# Supplementary material for: Controlling Antimicrobial Activity of Quinolones Using Visible/NIR Light-Activated BODIPY Photocages
Source: MDPI journal article supplement (doi:10.3390/pharmaceutics14051070), 2022-05-17
Supplement: s1 [file s1]

Supporting information:

## **Controlling Antimicrobial Activity of Quinolones Using Visible/NIR Light-Activated BODIPY Photocages**

Elena Contreras-García,<sup>[a]</sup> Carmen Lozano,<sup>[b]</sup> Cristina García-Iriepe,<sup>[c,d]</sup> Marco Marazzi,<sup>[c,d]</sup> Arthur H. Winter,<sup>[e]</sup> Carmen Torres,<sup>[b]</sup> and Diego Sampedro\*<sup>[a]</sup>

<sup>[a]</sup>Departamento de Química, Centro de Investigación en Síntesis Química (CISQ), Universidad de La Rioja, Madre de Dios 53, 26006 Logroño, Spain

<sup>[b]</sup>Área de Bioquímica y Biología Molecular, Universidad de La Rioja, Madre de Dios 53, 26006 Logroño, Spain

<sup>[c]</sup>Universidad de Alcalá, Departamento de Química Analítica, Química Física e Ingeniería Química, Grupo de Reactividad y Estructura Molecular (RESMOL), Alcalá de Henares, Madrid, Spain

<sup>[d]</sup>Universidad de Alcalá, Instituto de Investigación Química “Andrés M. del Río” (IQAR), Alcalá de Henares, Madrid, Spain

<sup>[e]</sup>Department of Chemistry, Iowa State University, Ames, Iowa 50014, United States

## **Contents**

|                                                                 |    |
|-----------------------------------------------------------------|----|
| 1. General information.....                                     | 2  |
| 2. Synthesis.....                                               | 3  |
| 3. HPLC Conditions .....                                        | 12 |
| 4. Photorelease studies.....                                    | 14 |
| 5. Quantum yield measurements.....                              | 20 |
| 6. Determination of minimal inhibitory concentration (MIC)..... | 22 |
| 7. Characterization data .....                                  | 23 |
| 8. Computational Results .....                                  | 31 |
| 9. Cartesian Coordinates .....                                  | 36 |
| 10. References.....                                             | 70 |

## 1. General information

All chemicals were obtained from commercial sources and used as received unless stated otherwise. Room temperature reactions were carried out between 22-25 °C. Thin-layer chromatography (TLC) was performed using silica gel 60 pre-coated aluminum plates (Macherey-Nagel 0.20 mm thickness) with a fluorescence indicator UV254. Solvents were ACS grade and used without further purification. For the detection of components, UV light at 254 nm was used. All chromatographic solvents were ACS grade and used without further purification. Column chromatography was performed on silica gel 60 (0.040-0.063 mm) and the indicated eluent in each case.

$^1\text{H}$  and  $^{13}\text{C}$  NMR spectra were recorded on a Bruker AVANCE III HD (300 MHz), or Bruker AVANCE NEO (400 MHz) spectrometers at 25 °C. Chemical shifts ( $\delta$ ) are reported in parts per million (ppm) with the solvent resonance as the internal standard ( $\delta_{\text{H}}$  7.26 for  $\text{CHCl}_3$ , and 2.50 for  $\text{DMSO-d}_6$ ;  $\delta_{\text{C}}$  77.16 for  $\text{CHCl}_3$ ). Coupling constants ( $J$ ) are reported in Hertz (Hz). The following abbreviations are used to indicate signal multiplicity: s (singlet), d (doublet), t (triplet), q (quartet), m (multiplet), dd (doublet of doublets), and quint (quintet).

Molecular absorption spectra were obtained by using a spectrometer provided with an Ocean Optics USB4000-UV-Vis detector and coupled to a deuterium/tungsten halogen lamp. Quartz cuvettes with 1 cm optical path length were used. Solutions were prepared in a concentration range of  $5 \times 10^{-5}$  M approximately.

High-resolution electrospray mass spectra (HR ESI-MS) were recorded on a Bruker MicroTOF-Q spectrometer. Accurate mass measurements were achieved by using sodium formate as an external reference. HR ESI-MS performed at Iowa State University were recorded on an Agilent QTOF 6540 spectrometer.

## 2. Synthesis

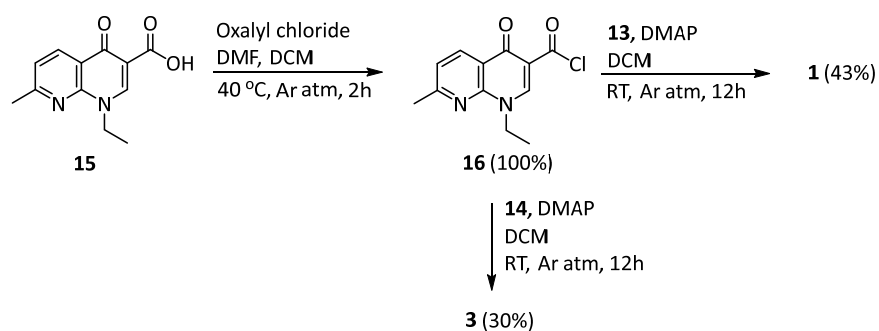

**Figure S1.** Synthetic route of compounds **1** and **3**, photoreleasable derivatives of naldixic acid.

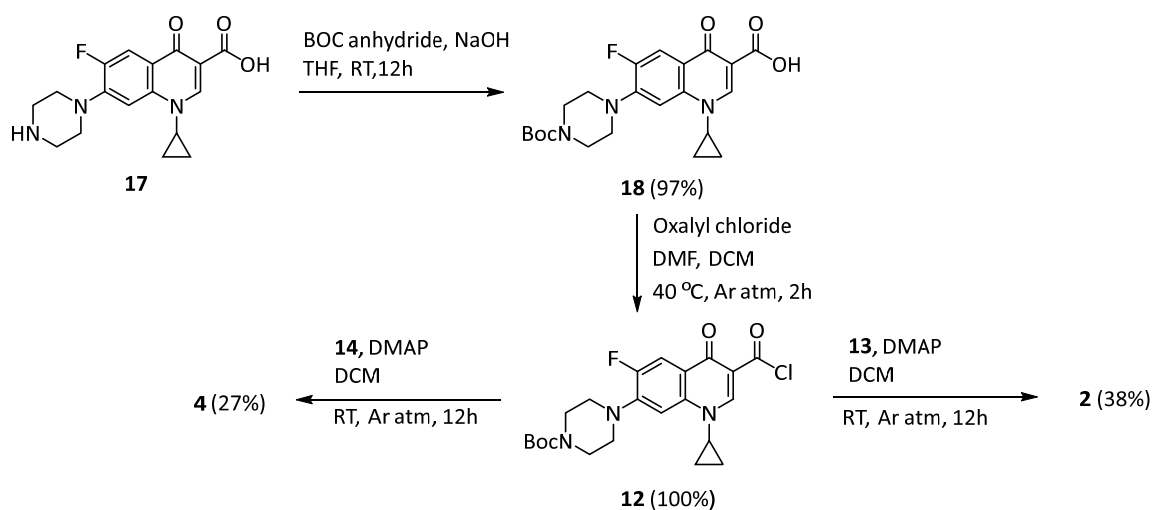

**Figure S2.** Synthetic route of compounds **2** and **4**, photoreleasable derivatives of Boc-ciprofloxacin.

**(5,5-difluoro-1,3,7,9-tetramethyl-5*H*-4l4,5l4-dipyrrolo[1,2-*c*:2',1'-*f*][1,3,2]diazaborinin-10-yl) methanol (13):**

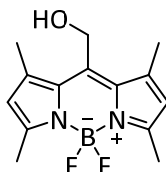

Compound prepared according to a previously described procedure (75% yield).<sup>1</sup>

<sup>1</sup>H-NMR (300 MHz, CDCl<sub>3</sub>): δ 6.09 (s, 2H), 4.91 (s, 2H), 2.53 (s, 6H), 2.51 (s, 6H).

<sup>1</sup>H-NMR spectrum in agreement with published data.<sup>1</sup>

**(3,7-bis(4-(dimethylamino)styryl)-5,5-difluoro-1,9-dimethyl-5*H*-4l4,5l4- dipyrrolo[1,2-*c*:2',1'-*f*][1,3,2]diazaborinin-10-yl)methanol (14):**

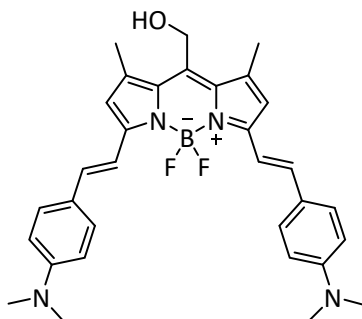

Compound prepared according to a previously described procedure (92% yield).<sup>2</sup>

<sup>1</sup>H-NMR (300 MHz, DMSO-*d*<sub>6</sub>): δ 7.48-7.43 (m, 6H), 7.27 (d, *J* = 16 Hz, 2H), 6.94 (s, 2H), 6.79 (d, *J* = 8.9 Hz, 4H), 5.45 (t, *J* = 4.9 Hz, 1H), 4.74 (d, *J* = 4.8 Hz, 2H), 3.00 (s, 12H), 2.54 (s, 6H).

<sup>1</sup>H-NMR spectrum in agreement with published data.<sup>2</sup>

**1-ethyl-7-methyl-4-oxo-1,4-dihydro-1,8-naphthyridine-3-carbonyl chloride (16):**

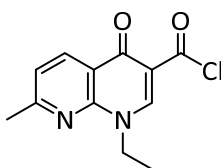

To a solution of nalidixic acid (0.43 mmol, 0.1 g) in dry DCM (4 ml) under argon atmosphere was added oxalyl chloride (1.29 mmol, 0.11 ml) and one drop of DMF. The resulting mixture was stirred for 2 hours at 40 °C. After that time, the solvent was evaporated *in vacuo* to give 0.11 g of a dark blue solid that was immediately used in the next step.

**(5,5-difluoro-1,3,7,9-tetramethyl-5*H*-4*l*4,5*l*4-dipyrrolo[1,2-*c*:2',1'-*f*][1,3,2]diazaborinin-10-yl) methyl 1-ethyl-7-methyl-4-oxo-1,4-dihydro-1,8-naphthyridine-3-carboxylate (1):**

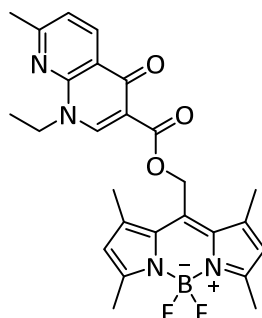

Compound **13** (80 mg, 0.29 mmol) was dissolved in dry DCM (4 ml) under argon atmosphere and 4-(dimethylamino)pyridine (70 mg, 0.58 mmol) was added. This mixture was added over a solution containing compound **16** (111 mg, 0.43 mmol) in dry DCM (3 ml) under argon atmosphere. The reaction mixture was stirred in the dark for 12 hours at room temperature. After that time, the solvent was evaporated *in vacuo*, and the resulting residue was purified by column chromatography (DCM:EtOAc 5:2) to obtain 61 mg (43%) of a red solid.

$^1\text{H-NMR}$  (400 MHz,  $\text{CDCl}_3$ ):  $\delta$  8.63 (d,  $J = 8.1$  Hz, 1H), 8.55 (s, 1H), 7.24 (d,  $J = 8.1$  Hz, 1H), 6.08 (s, 2H), 5.51 (s, 2H), 4.46 (q,  $J = 7.1$  Hz, 2H), 2.65 (s, 3H), 2.54 (s, 6H), 2.44 (s, 6H), 1.47 (t,  $J = 7.1$  Hz, 3H).

$^{13}\text{C-NMR}$  (100 MHz,  $\text{CDCl}_3$ ):  $\delta$  174.8, 164.2, 163.0, 156.6, 148.7, 142.1, 137.0, 134.0, 133.1, 122.4, 121.6, 121.5, 110.6, 58.1, 47.0, 25.2, 15.9, 15.4, 14.8.

HR-MS (ESI,  $[\text{M}+\text{H}]^+$ ): Calcd. for  $\text{C}_{26}\text{H}_{27}\text{BF}_2\text{N}_4\text{O}_3 + \text{H}$ : 493.2217; Found: 493.2226

**(3,7-bis(4-(dimethylamino)styryl)-5,5-difluoro-1,9-dimethyl-5*H*-4*l*4,5*l*4-dipyrrolo[1,2-*c*:2',1'-*f*][1,3,2]diazaborinin-10-yl)methyl 1-ethyl-7-methyl-4-oxo-1,4-dihydro-1,8-naphthyridine-3-carboxylate (3):**

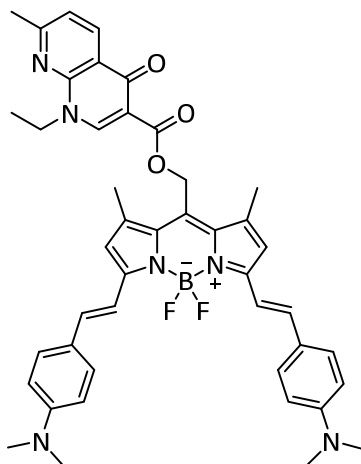

Compound **14** (83 mg, 0.15 mmol) was dissolved in dry DCM (4 ml) under argon atmosphere and 4-(dimethylamino)pyridine (37 mg, 0.30 mmol) was added. This mixture was added over a solution containing compound **16** (56 mg, 0.23 mmol) in dry DCM (3 ml) under argon atmosphere. The reaction mixture was stirred in the dark for 12 hours at room temperature. After that time, the solvent was evaporated *in vacuo*, and the resulting residue was purified by column chromatography (DCM:EtOAc:Toluene 2:3:1) to obtain 34 mg (30%) of a dark green solid.

<sup>1</sup>H-NMR (300 MHz, CDCl<sub>3</sub>): δ 8.64 (d, *J* = 8.1 Hz, 1H), 8.57 (s, 1H), 7.53 (d, *J* = 8.9 Hz, 6H), 7.25-7.15 (m, 3H), 6.71 (d, *J* = 8.9 Hz, 6H), 5.53 (s, 2H), 4.45 (q, *J* = 7.1 Hz, 2H), 3.04 (s, 12H), 2.64 (s, 3H), 2.46 (s, 6H), 1.45 (t, *J* = 7.1 Hz, 3H).

<sup>13</sup>C-NMR (75 MHz, CDCl<sub>3</sub>): δ 175.0, 163.7, 162.9, 153.4, 151.1, 148.7, 148.6, 139.5, 137.2, 137.0, 129.4, 129.3, 125.2, 121.5, 121.4, 118.4, 115.0, 112.2, 110.6, 58.4, 46.9, 40.4, 25.2, 16.1, 15.4.

HR-MS (ESI, [M+Na]<sup>+</sup>): Calcd. for C<sub>44</sub>H<sub>45</sub>BF<sub>2</sub>N<sub>6</sub>O<sub>3</sub> +Na: 777.3514; Found: 777.3497

**7-(4-(*tert*-butoxycarbonyl)piperazin-1-yl)-1-cyclopropyl-6-fluoro-4-oxo-1,4-dihydroquinoline-3-carboxylic acid (18):**

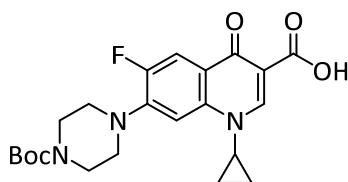

Ciprofloxacin (2 g, 6.0 mmol) and di-*tert*-butyl decarbonate (1.4 g, 6.6 mmol) were dissolved in THF (60 ml). Next, a solution of sodium hydroxide (0.48 g, 12.0 mmol) in water (12 ml) was added, and the mixture was stirred overnight at room temperature. After that time, the solvent was removed *in vacuo*, and the residue was taken into aqueous saturated ammonium chloride (200 ml). The aqueous phase was extracted with DCM (200 ml) three times. The organic layer was washed with brine (400 ml) and dried over anhydrous MgSO<sub>4</sub>. The solvent was evaporated *in vacuo* to obtain 2.51 g (97%) of white solid.

<sup>1</sup>H-NMR (300 MHz, CDCl<sub>3</sub>): δ 14.94 (s, 1H), 8.71 (s, 1H), 7.96 (d, *J* = 12.9 Hz, 1H), 7.35 (d, *J* = 7.1 Hz, 1H), 3.72 – 3.61 (m, 4H), 3.59-3.50 (m, 1H), 3.34 – 3.21 (m, 4H), 1.49 (s, 9H), 1.41- 1.35 (m, 2H), 1.26 – 1.15 (m, 2H).

***Tert*-butyl 4-(3-(chlorocarbonyl)-1-cyclopropyl-6-fluoro-4-oxo-1,4-dihydroquinolin-7-yl)piperazine-1-carboxylate (12):**

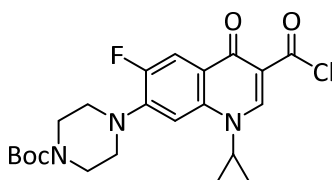

To a solution of compound **18** (0.15 g, 0.35 mmol) in dry DCM (5 ml) under argon atmosphere, oxalyl chloride (88 μl, 1.05 mmol) and one drop of DMF were added. The reaction was stirred for 2 hours at 40 °C. After that time, the solvent was removed *in vacuo* to give 0.16 g (100%) of an orange solid that was immediately used in the next step.

**(5,5-difluoro-1,3,7,9-tetramethyl-5H-4l4,5l4-dipyrrolo[1,2-c:2',1'-f][1,3,2] diazaborinin-10-yl) methyl 7-(4-(tert-butoxycarbonyl)piperazin-1-yl)-1-cyclopropyl-6-fluoro-4-oxo-1,4-dihydroquinoline-3-carboxylate (2):**

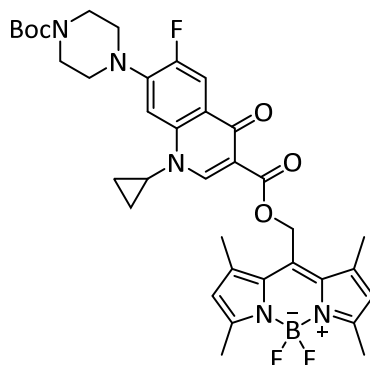

Compound **13** (67 mg, 0.24 mmol) was dissolved in dry DCM (4 ml) under argon atmosphere and 4-(dimethylamino)pyridine (57 mg, 0.47 mmol) was added. This mixture was added over a solution containing compound **12** (160 mg, 0.36 mmol) in dry DCM (3 ml) under argon atmosphere. The reaction mixture was stirred in the dark for 12 hours at room temperature. After that time, the solvent was evaporated *in vacuo*, and the resulting residue was purified by column chromatography (DCM:EtOAc 5:2) to obtain 63 mg (38%) of a red solid.

$^1\text{H-NMR}$  (300 MHz,  $\text{CDCl}_3$ ):  $\delta$  8.45 (s, 1H), 8.05 (d,  $J = 13.1$  Hz, 1H), 7.24 (d, 1H), 6.08 (s, 2H), 5.51 (s, 2H), 3.68 – 3.60 (m, 4H), 3.45 – 3.33 (m, 1H), 3.24 – 3.16 (m, 4H), 2.53 (s, 6H), 2.45 (s, 6H), 1.49 (s, 9H), 1.34 – 1.26 (m, 2H), 1.12 – 1.02 (m, 2H).

$^{13}\text{C-NMR}$  (75 MHz,  $\text{CDCl}_3$ ):  $\delta$  173.1, 164.6, 156.5, 155.2, 154.7, 151.9, 148.2, 144.8, 142.1, 138.1, 134.1, 133.1, 122.4, 113.8, 109.3, 105.1, 80.4, 58.1, 50.1, 43.6, 34.7, 28.6, 15.9, 14.8, 8.5.

HR-MS (ESI,  $[\text{M}+\text{H}]^+$ ): Calcd. for  $\text{C}_{36}\text{H}_{41}\text{BF}_3\text{N}_5\text{O}_5 + \text{H}$ : 692.3225; Found: 692.3235

**(3,7-bis(4-(dimethylamino)styryl)-5,5-difluoro-1,9-dimethyl-5H-4l4,5l4-dipyrrolo[1,2-c:2',1'-f][1,3,2]diazaborinin-10-yl)methyl 7-(4-(tert-butoxycarbonyl)piperazin-1-yl)-1-cyclopropyl-6-fluoro-4-oxo-1,4-dihydroquinoline-3-carboxylate (4):**

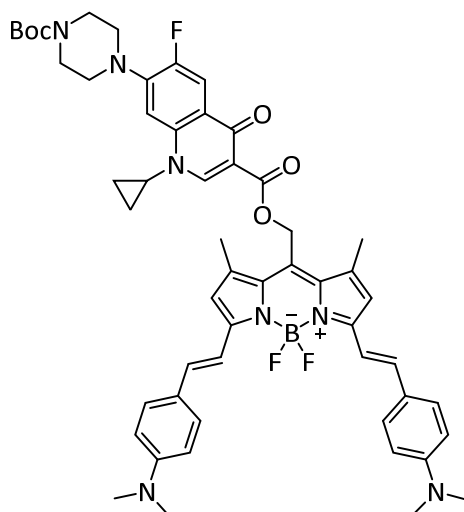

Compound **14** (83 mg, 0.15 mmol) was dissolved in dry DCM (4 ml) under argon atmosphere and 4-(dimethylamino)pyridine (37 mg, 0.30 mmol) was added. This mixture was added over a solution

containing compound **12** (103 mg, 0.23 mmol) in dry DCM (3 ml) under argon atmosphere. The reaction mixture was stirred in the dark for 12 hours at room temperature. After that time, the solvent was evaporated *in vacuo*, and the resulting residue was purified by column chromatography (DCM:EtOAc:Toluene 2:3:1) to obtain 34 mg (30%) of a dark green solid.

$^1\text{H-NMR}$  (300 MHz,  $\text{CDCl}_3$ ):  $\delta$  8.45 (s, 1H), 8.07 (d,  $J$  = 13.1 Hz, 1H), 7.53 (d,  $J$  = 8.9 Hz, 6H), 7.25 – 7.17 (m, 3H), 6.71 (d,  $J$  = 8.7 Hz, 6H), 5.54 (s, 2H), 3.66 – 3.59 (m, 4H), 3.42 – 3.32 (m, 1H), 3.22 – 3.16 (m, 4H), 3.03 (s, 12H), 2.48 (s, 6H), 1.49 (s, 9H), 1.26 – 1.21 (m, 2H), 1.09 – 1.02 (m, 2H).

$^{13}\text{C-NMR}$  (75 MHz,  $\text{CDCl}_3$ ):  $\delta$  173.3, 164.1, 154.8, 153.4, 151.1, 148.0, 144.7, 144.6, 139.6, 138.1, 137.1, 134.8, 129.4, 129.3, 127.9, 125.2, 123.3, 118.4, 115.0, 113.9, 113.6, 112.2, 109.4, 105.2, 80.3, 58.4, 50.1, 43.6, 40.4, 34.7, 28.6, 16.1, 8.6.

HR-MS (ESI,  $[\text{M}+\text{H}]^+$ ): Calcd. for  $\text{C}_{54}\text{H}_{59}\text{BF}_3\text{N}_7\text{O}_5 + \text{H}$ : 954.4704; Found: 954.4659

**6-(2-(2-(2-methoxyethoxy)ethoxy)ethoxy)-3,4-dihydronaphthalen-1(2H)-one (7):**

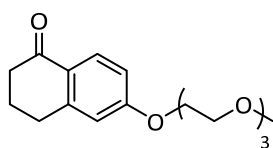

To a solution of 6-hydroxy-1-tetralone **6** (1 g, 6.2 mmol) in anhydrous DMF (15 ml) under argon atmosphere was added sodium carbonate (1.3 g, 12.3 mmol), 1-chloro-2-[2-(2-methoxyethoxy)ethoxy]ethane (1.2 g, 6.7 mmol), and sodium iodide as a catalyst. The resulting mixture was stirred for 16 hours at 100 °C. After that time, the solvent was removed *in vacuo*, and the resulting product was neutralized with 1M HCl. Then, it was extracted with DCM (60 ml) twice, and the organic layers were washed with brine (60 ml). Next, the organic layer was dried over anhydrous  $\text{MgSO}_4$ , and the solvent was evaporated *in vacuo* to give 1.8 g (95%) of a clear oil.

$^1\text{H-NMR}$  (400 MHz,  $\text{CDCl}_3$ ):  $\delta$  7.99 (d,  $J$  = 8.7 Hz, 1H), 6.83 (dd,  $J$  = 8.8, 2.5 Hz, 1H), 6.71 (d,  $J$  = 2.5 Hz, 1H), 4.20 – 4.15 (m, 2H), 3.88-3.84 (m, 2H), 3.75-3.72 (m, 2H), 3.70 – 3.61 (m, 4H), 3.56-3.53 (m, 2H), 3.37 (s, 3H), 2.92-2.89 (m, 2H), 2.62-2.58 (m, 2H), 2.10 (quint,  $J$  = 6.4 Hz, 2H).

$^{13}\text{C-NMR}$  (100 MHz,  $\text{CDCl}_3$ ):  $\delta$  197.3, 162.9, 147.0, 129.7, 126.6, 113.6, 113.4, 72.1, 71.0, 70.8, 70.7, 69.7, 67.7, 59.2, 39.0, 30.3, 23.5.

HR-MS (ESI,  $[\text{M}+\text{H}]^+$ ): Calcd. for  $\text{C}_{17}\text{H}_{24}\text{O}_5 + \text{H}$ : 309.1697; Found: 309.1701

**6-(2-(2-(2-methoxyethoxy)ethoxy)ethoxy)-3,4-dihydronaphthalen-1(2H)-one oxime (8):**

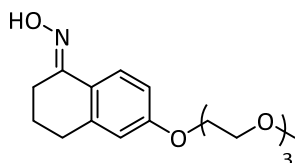

Sodium acetate (0.29 g, 3.6 mmol) was dissolved in water (3 ml) and added over a solution of hydroxylamine hydrochloride (0.25 g, 3.6 mmol) in water (3 ml). The resulting mixture was added over a solution of compound **7** (1 g, 3.2 mmol) in methanol (10 ml) and heated at 35 °C. Next, the sample was stirred for 2 hours at 80 °C. After that time, the reaction was cooled at room temperature, and the solvent was removed *in vacuo*. Next, water (30 ml) was added to the residue, and the aqueous phase was extracted with DCM (50 ml) twice. The combined organic layers were washed with brine (50 ml) and dried over anhydrous  $\text{MgSO}_4$ . Then, the solvent was evaporated *in vacuo* to result in 0.99 g (94%) of a clear oil.



$^1\text{H-NMR}$  (400 MHz,  $\text{CDCl}_3$ ):  $\delta$  7.77 (d,  $J$  = 8.7 Hz, 1H), 6.76 (dd,  $J$  = 8.8, 2.7 Hz, 1H), 6.66 (d,  $J$  = 2.6 Hz, 1H), 4.16 – 4.09 (m, 2H), 3.87 – 3.82 (m, 2H), 3.75 – 3.71 (m, 2H), 3.70 – 3.62 (m, 4H), 3.58 – 3.52 (m, 2H), 3.37 (s, 3H), 2.79 (t,  $J$  = 6.6 Hz, 2H), 2.70 (t,  $J$  = 6.1 Hz, 2H), 1.85 (quint,  $J$  = 6.5 Hz, 2H).

$^{13}\text{C-NMR}$  (100 MHz,  $\text{CDCl}_3$ ):  $\delta$  159.6, 155.2, 141.6, 125.7, 123.5, 113.8, 113.6, 72.0, 70.9, 70.8, 70.7, 69.8, 67.4, 59.1, 30.2, 23.9, 21.5.

HR-MS (ESI,  $[\text{M}+\text{H}]^+$ ): Calcd. for  $\text{C}_{17}\text{H}_{25}\text{NO}_5 + \text{H}$ : 324.1805; Found: 324.1811

**7-(2-(2-(2-methoxyethoxy)ethoxy)ethoxy)-4,5-dihydro-1H-benzo[g]indole (9):**

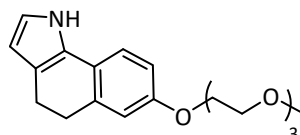

In a three-neck flask, under argon atmosphere, compound **8** (1 g, 3.1 mmol) was dissolved in DMSO (25 ml). Next, lithium hydroxide monohydrate (0.7 g, 16.7 mmol) was added, and a light flow of acetylene was passed through the reaction mixture. The mixture was heated at 135 °C while keeping the acetylene flow for 6 hours. After that time, the reaction mixture was allowed to reach room temperature, and distilled water (60 ml) was added. Then, the aqueous phase was extracted with diethyl ether (100 ml) five times. The combined organic layers were extracted with water (100 ml) once. Finally, the organic layer was dried over anhydrous  $\text{MgSO}_4$  and the solvent was removed *in vacuo*. The obtained residue was purified by column chromatography (DCM:EtOAc 5:1) to give 0.31 g (30%) of a clear oil.

$^1\text{H-NMR}$  (400 MHz,  $\text{CDCl}_3$ ):  $\delta$  8.34 (s, 1H), 7.06 (d,  $J$  = 8.3 Hz, 1H), 6.80 (d,  $J$  = 2.5 Hz, 1H), 6.72 (d,  $J$  = 2.7 Hz, 1H), 6.71 (t,  $J$  = 2.7 Hz, 1H), 6.10 (t,  $J$  = 2.5 Hz, 1H), 4.14 – 4.07 (m, 2H), 3.86 – 3.82 (m, 2H), 3.76 – 3.72 (m, 2H), 3.71–3.64 (m, 4H), 3.59 – 3.52 (m, 2H), 3.38 (s, 3H), 2.89 (t,  $J$  = 7.5 Hz, 2H), 2.72 (t,  $J$  = 7.3 Hz, 2H).

$^{13}\text{C-NMR}$  (100 MHz,  $\text{CDCl}_3$ ):  $\delta$  156.6, 136.8, 127.8, 123.1, 119.3, 118.5, 117.4, 115.6, 112.1, 108.0, 72.1, 70.9, 70.8, 70.7, 69.9, 67.6, 59.2, 30.6, 21.9.

HR-MS (ESI,  $[\text{M}+\text{H}]^+$ ): Calcd. for  $\text{C}_{19}\text{H}_{25}\text{NO}_4 + \text{H}$ : 332.1856; Found: 332.1855

**8-((acetyloxy)methyl)-17,17-difluoro-3,13-bis(2-(2-(2-methoxyethoxy)ethoxy)ethoxy)-5,10,11,17-tetrahydro-6H benzo[g]benzo[6',7']indolo[1',2':3,4] [1,3,2] diazaborinino[1,6-a]indol-16-ium (10):**

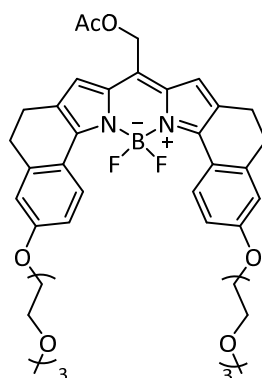

To a solution of compound **9** (0.94 mmol, 0.31 g) in dry DCM (10 ml) under argon atmosphere, was added acetoxyacetyl chloride (0.56 mmol, 60  $\mu\text{l}$ ) and the mixture was stirred in the dark at 40 °C for 2 hours. Then, TEA (1.7 mmol, 0.23 ml) was added. The resulting mixture was allowed to stir for 15

minutes. Next, boron trifluoride diethyl etherate (1.7 mmol, 0.21 ml) was added. After 1 hour of stirring, another portion of TEA (1.7 mmol, 0.23 ml) and boron trifluoride diethyl etherate (1.7 mmol, 0.21 ml) were added, and the stirring continued for one more hour. After that time, the solvent was evaporated *in vacuo*, and the obtained residue was purified by column chromatography (DCM:MeOH 32:1) to give 85 mg (23%) of a deep blue-green solid.

$^1\text{H-NMR}$  (400 MHz,  $\text{CDCl}_3$ ):  $\delta$  8.68 (d,  $J = 9.0$  Hz, 2H), 6.98 (s, 2H), 6.95 (dd,  $J = 8.9, 2.7$  Hz, 2H), 6.82 (d,  $J = 2.7$  Hz, 2H), 5.25 (s, 2H), 4.24 – 4.19 (m, 4H), 3.91 – 3.86 (m, 4H), 3.78 – 3.73 (m, 4H), 3.72 – 3.65 (m, 8H), 3.58 – 3.53 (m, 4H), 3.38 (s, 6H), 2.88 (t,  $J = 7.0$  Hz, 4H), 2.73 (t,  $J = 6.4$  Hz, 4H), 2.10 (s, 3H).

$^{13}\text{C-NMR}$  (100 MHz,  $\text{CDCl}_3$ ):  $\delta$  170.7, 160.2, 152.6, 143.1, 136.2, 132.6, 130.4, 128.3, 122.1, 121.6, 115.1, 113.1, 72.1, 71.0, 70.8, 70.7, 69.7, 67.5, 59.9, 59.2, 31.0, 22.5, 21.1.

HR-MS (ESI,  $[\text{M}+\text{H}]^+$ ): Calcd. for  $\text{C}_{42}\text{H}_{51}\text{BF}_2\text{N}_2\text{O}_{10} + \text{H}$ : 790.3568; Found: 790.3562

**17,17-difluoro-8-(hydroxymethyl)-3,13-bis(2-(2-(2-methoxyethoxy)ethoxy)ethoxy)-5,10,11,17-tetrahydro-6H-benzo[g]benzo[6',7']indolo[1',2':3,4] [1,3,2]diazaborinino [1,6-a]indol-16-ium (11):**

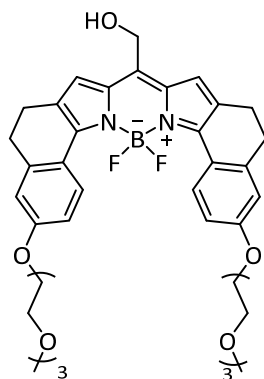

To a solution of compound **10** (0.11 mmol, 85 mg) in a mixture of DCM (25 ml) and MeOH (10 ml) was added a solution of potassium carbonate (0.39 mmol, 53 mg) in water (1 ml). The reaction mixture was stirred in the dark at room temperature for 3 hours. After that time, the organic solvent was removed *in vacuo*, and the residue was extracted with DCM (40 ml) twice. Next, the combined organic layers were washed with 1M HCl (10 ml) and brine (20 ml). The organic layer was dried over anhydrous  $\text{MgSO}_4$ , and the solvent was removed *in vacuo*. The resulting residue was purified by column chromatography (DCM:MeOH 40:1) to obtain 48 mg (58%) of a dark green solid.

$^1\text{H-NMR}$  (400 MHz,  $\text{CDCl}_3$ ):  $\delta$  8.68 (d,  $J = 9.0$  Hz, 2H), 7.04 (s, 2H), 6.96 (dd,  $J = 8.9, 2.7$  Hz, 2H), 6.82 (d,  $J = 2.7$  Hz, 2H), 4.81 (s, 2H), 4.28 – 4.14 (m, 4H), 3.93 – 3.84 (m, 4H), 3.80 – 3.72 (m, 4H), 3.72 – 3.64 (m, 8H), 3.59 – 3.52 (m, 4H), 3.38 (s, 6H), 2.88 (t,  $J = 7.0$  Hz, 4H), 2.73 (t,  $J = 7.0$  Hz, 4H).

$^{13}\text{C-NMR}$  (100 MHz,  $\text{CDCl}_3$ ):  $\delta$  160.1, 152.4, 143.0, 135.5, 133.5, 132.4, 121.8, 121.8, 121.7, 115.1, 113.1, 72.1, 71.0, 70.8, 70.7, 69.8, 67.6, 59.9, 59.2, 31.0, 22.6.

HR-MS (ESI,  $[\text{M}+\text{H}]^+$ ): Calcd. for  $\text{C}_{40}\text{H}_{49}\text{BF}_2\text{N}_2\text{O}_9 + \text{H}$ : 790.3568; Found: 790.3562

8-(((7-(4-(*tert*-butoxycarbonyl)piperazin-1-yl)-1-cyclopropyl-6-fluoro-4-oxo-1,4-dihydroquinolin-3-yl)carbonyl)oxy)methyl)-17,17-difluoro-3,13-bis(2-(2-(2-methoxyethoxy)ethoxy)ethoxy)-5,10,11,17-tetrahydro-6H benzo[g]benzo [6',7'] indolo [1',2':3,4][1,3,2]diazaborinino[1,6-a]indol-16-ium (5):

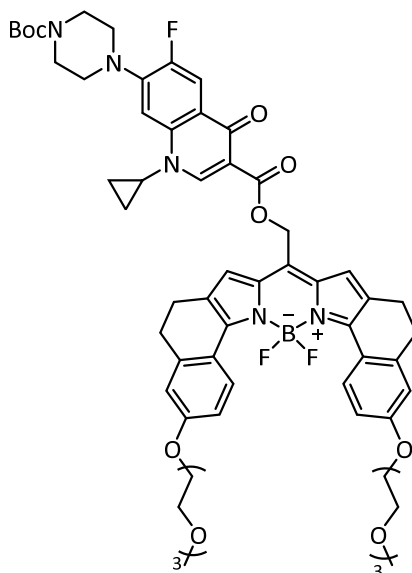

Compound **11** (48 mg, 0.06 mmol) was dissolved in dry DCM (3 ml) under argon atmosphere and 4-(dimethylamino)pyridine (16 mg, 0.13 mmol) was added. This mixture was added over a solution containing compound **12** (39 mg, 0.09 mmol) in dry DCM (2 ml) under argon atmosphere. The reaction mixture was stirred in the dark for 12 hours at room temperature. After that time, the solvent was evaporated *in vacuo*, and the resulting residue was purified by column chromatography (DCM:MeOH 40:1) to obtain 21 mg (28%) of a dark green solid.

$^1\text{H-NMR}$  (400 MHz,  $\text{CDCl}_3$ ):  $\delta$  8.68 (d,  $J$  = 9.0 Hz, 2H), 8.46 (s, 1H), 8.07 (d,  $J$  = 13.1 Hz, 1H), 7.24 (d,  $J$  = 7.0 Hz, 1H), 7.18 (s, 2H), 6.95 (dd,  $J$  = 8.9, 2.7 Hz, 2H), 6.82 (d,  $J$  = 2.7 Hz, 2H), 5.49 (s, 2H), 4.25 – 4.16 (m, 4H), 3.91 – 3.81 (m, 4H), 3.79 – 3.73 (m, 4H), 3.72 – 3.61 (m, 12H), 3.59 – 3.52 (m, 4H), 3.38 (s, 6H), 3.45–3.33 (m, 1H), 3.20 (m, 4H), 2.88 (t,  $J$  = 6.2 Hz, 4H), 2.74 (t,  $J$  = 7.1 Hz, 4H), 1.49 (s, 9H), 1.31 – 1.26 (m, 2H), 1.10–1.05 (m, 2H).

$^{13}\text{C-NMR}$  (100 MHz,  $\text{CDCl}_3$ ):  $\delta$  173.2, 164.3, 160.1, 154.8, 154.7, 152.4, 152.3, 148.5, 144.6, 143.1, 138.1, 136.2, 132.6, 130.3, 129.3, 122.6, 121.7, 115.1, 113.8, 113.6, 113.1, 109.5, 105.3, 80.4, 72.1, 71.0, 70.8, 70.7, 69.8, 67.5, 60.1, 59.2, 53.6, 50.1, 34.8, 31.0, 29.8, 28.5, 22.6, 8.4.

HR-MS (ESI,  $[\text{M}+\text{H}]^+$ ): Calcd. for  $\text{C}_{62}\text{H}_{73}\text{BF}_3\text{N}_5\text{O}_{13} + \text{H}$ : 1163.5359; Found: 1163.5340

### 3. HPLC Conditions

A Phenomenex C18 column (250 mm x 4.6 mm x 5  $\mu$ m) was employed as the stationary phase. The mobile phase consisted of different mixtures of acetonitrile and water containing 0.1% of trifluoroacetic acid. The flow in all cases was 1 ml/minute, and the injection volume was 20  $\mu$ l, previously filtered through a 0.45  $\mu$ m PTFE membrane filter. The gradient methods used for each compound are described next.

**Table S1.** HPLC method A, used for the analysis of compounds **1** and **2**.

| Time (min) | Mobile phase composition (%) |                  |
|------------|------------------------------|------------------|
|            | Acetonitrile                 | Water (0.1% TFA) |
| 0          | 80                           | 20               |
| 5          | 40                           | 60               |
| 7          | 40                           | 60               |
| 14         | 10                           | 90               |
| 15         | 10                           | 90               |

For compounds **1** and **2**, the detection was carried out in dual-mode at 254 or 282, and 520 nm to monitor the release of the antibiotic as well as the remaining protected compound. Retention times are indicated next:  $t_{R1}$  = 12.8 min,  $t_{R2}$  = 14.7 min,  $t_{RNalidixic\ acid}$  = 8.0 min,  $t_{RBoc-ciprofloxacin}$  = 11.3 min.

**Table S2.** HPLC method B, used for the analysis of compounds **3**, **4**, and **5**.

| Time (min) | Mobile phase composition (%) |                  |
|------------|------------------------------|------------------|
|            | Acetonitrile                 | Water (0.1% TFA) |
| 0          | 80                           | 20               |
| 5          | 40                           | 60               |
| 7          | 40                           | 60               |
| 14         | 10                           | 90               |
| 20         | 10                           | 90               |

For compounds **3** and **4**, the detection was carried out in dual-mode at 254 or 282, and 730 nm in order to monitor the release of the antibiotic and the remaining protected compound. For compound **5**, the selected wavelengths in dual-mode were 282 and 675 nm. Retention times are indicated next:  $t_{R3}$  = 15.8 min,  $t_{R4}$  = 16.8 min,  $t_{R5}$  = 15.9 min,  $t_{RNalidixic\ acid}$  = 8.0 min,  $t_{RBoc-ciprofloxacin}$  = 11.3 min.

The following data correspond to the minimum purity of the samples as measured by HPLC:

- Compound 1: purity > 92%
- Compound 2: purity > 92%
- Compound 3: purity > 95%
- Compound 4: purity > 95%
- Compound 5: purity > 95%

#### 4. Photorelease studies

All compounds (**1-5**) were irradiated at a concentration of 256 mg/L in mixtures of DMSO/H<sub>2</sub>O with the LED lamp indicated in table 3. The release process was followed by HPLC (**1-4**) employing method A or B as indicated in HPLC conditions section, or <sup>1</sup>H-NMR (**5**).

**Table S3.** Irradiation conditions of photoreleasable quinolones

| Compound | DMSO/H <sub>2</sub> O | Volume (ml) | LED lamp                    |
|----------|-----------------------|-------------|-----------------------------|
| <b>1</b> | 60:40                 | 1           | Green ( $\lambda$ = 520 nm) |
| <b>2</b> | 60:40                 | 1           | Green ( $\lambda$ = 520 nm) |
| <b>3</b> | 80:20                 | 1           | NIR ( $\lambda$ = 730 nm)   |
| <b>4</b> | 80:20                 | 1           | NIR ( $\lambda$ = 730 nm)   |
| <b>5</b> | 60:40                 | 1           | Red ( $\lambda$ = 625 nm)   |

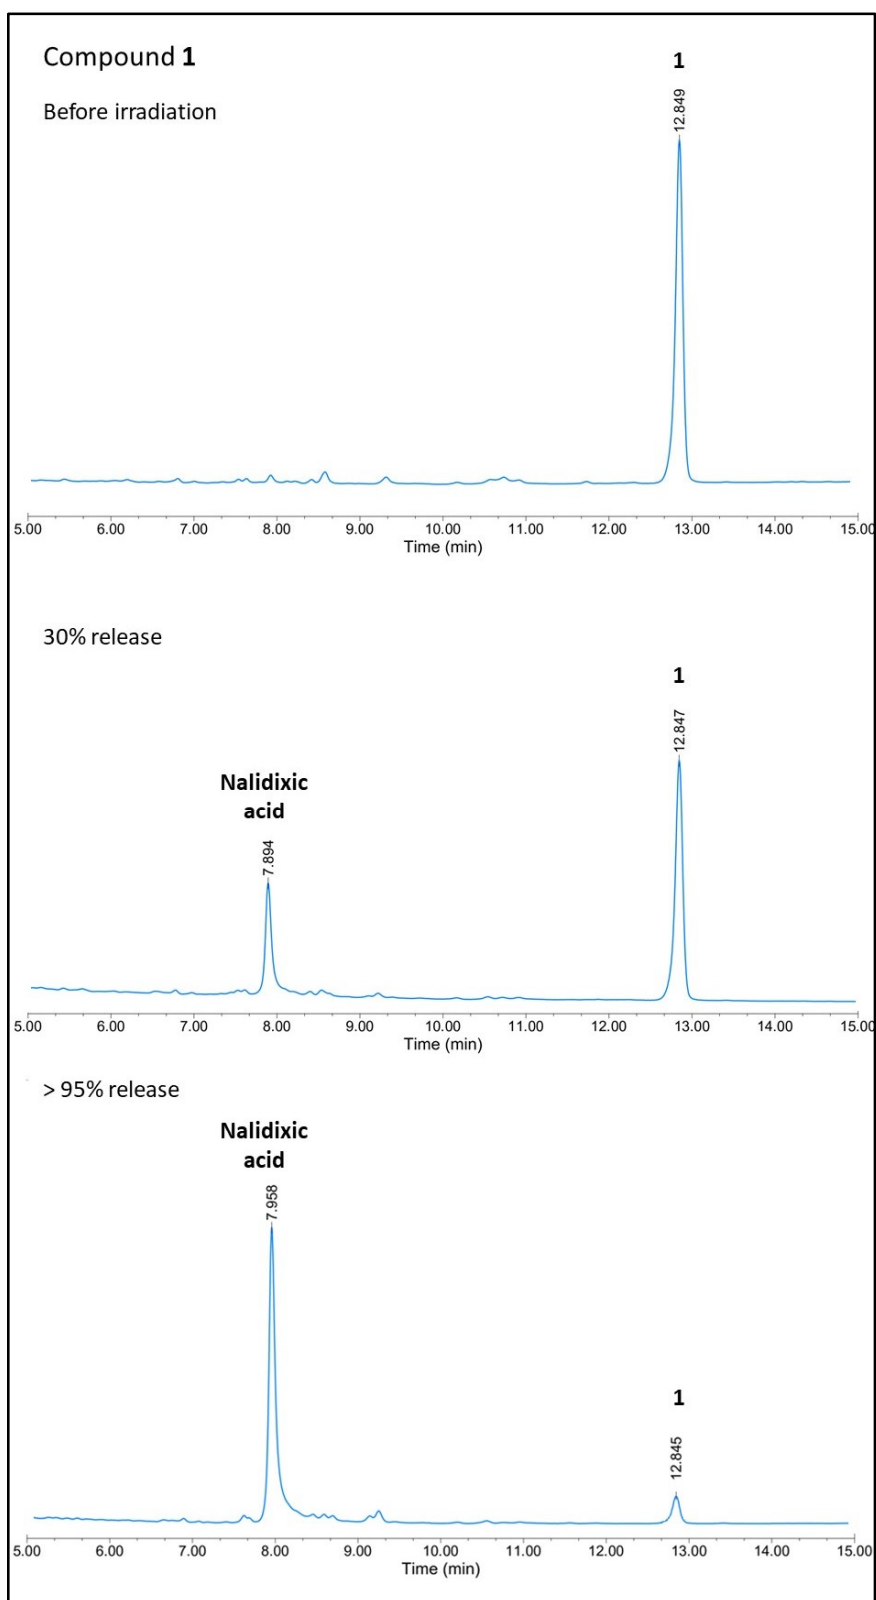

**Figure S3.** Release process of compound **1** upon irradiation with green light. The peak corresponding to compound **1** decreases while the peak of nalidixic acid grows. Release yield > 95%.

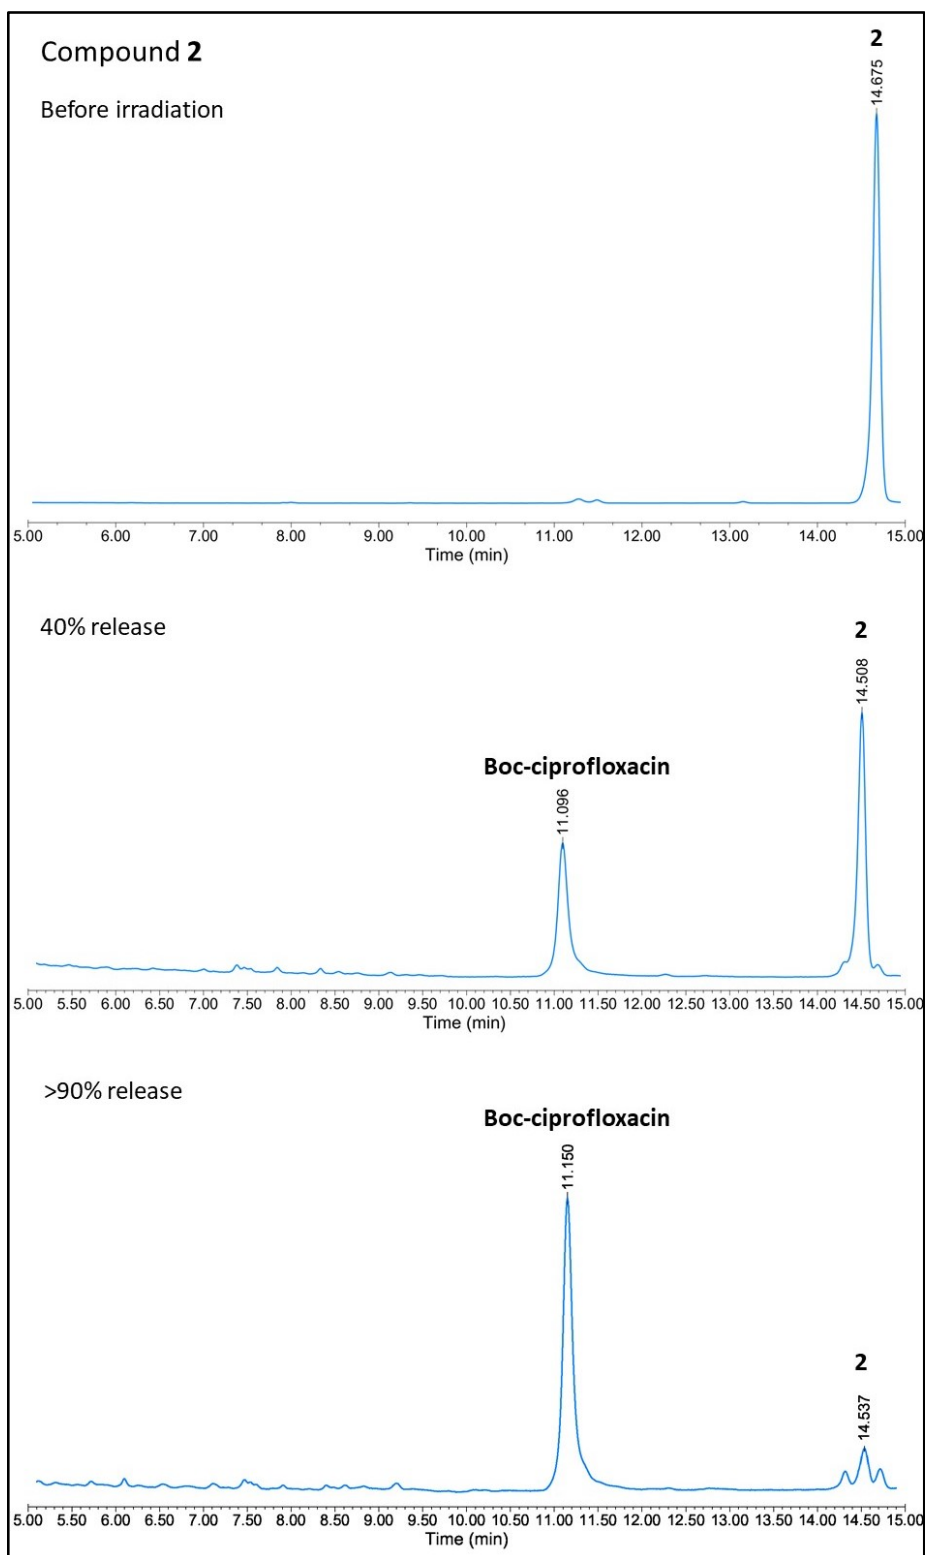

**Figure S4.** Release process of compound **2** upon irradiation with green light. The peak corresponding to compound **2** decreases while the peak of Boc-ciprofloxacin grows. Release yield > 90%.



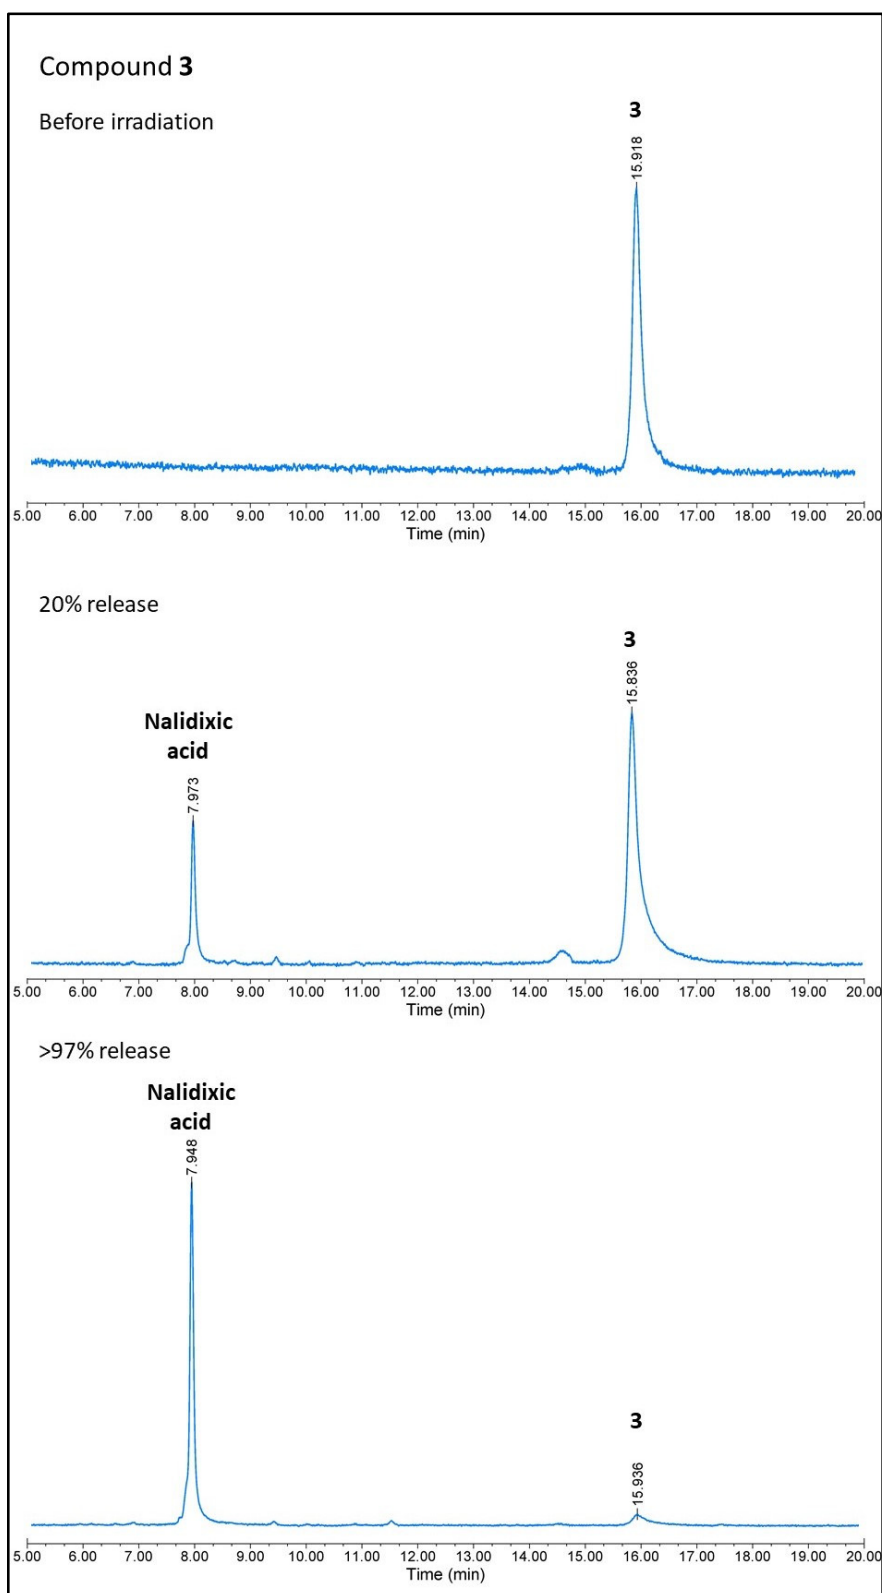

**Figure S5.** Release process of compound **3** upon irradiation with NIR light. The peak corresponding to compound **3** decreases while the peak of nalidixic acid grows. Release yield > 97%.

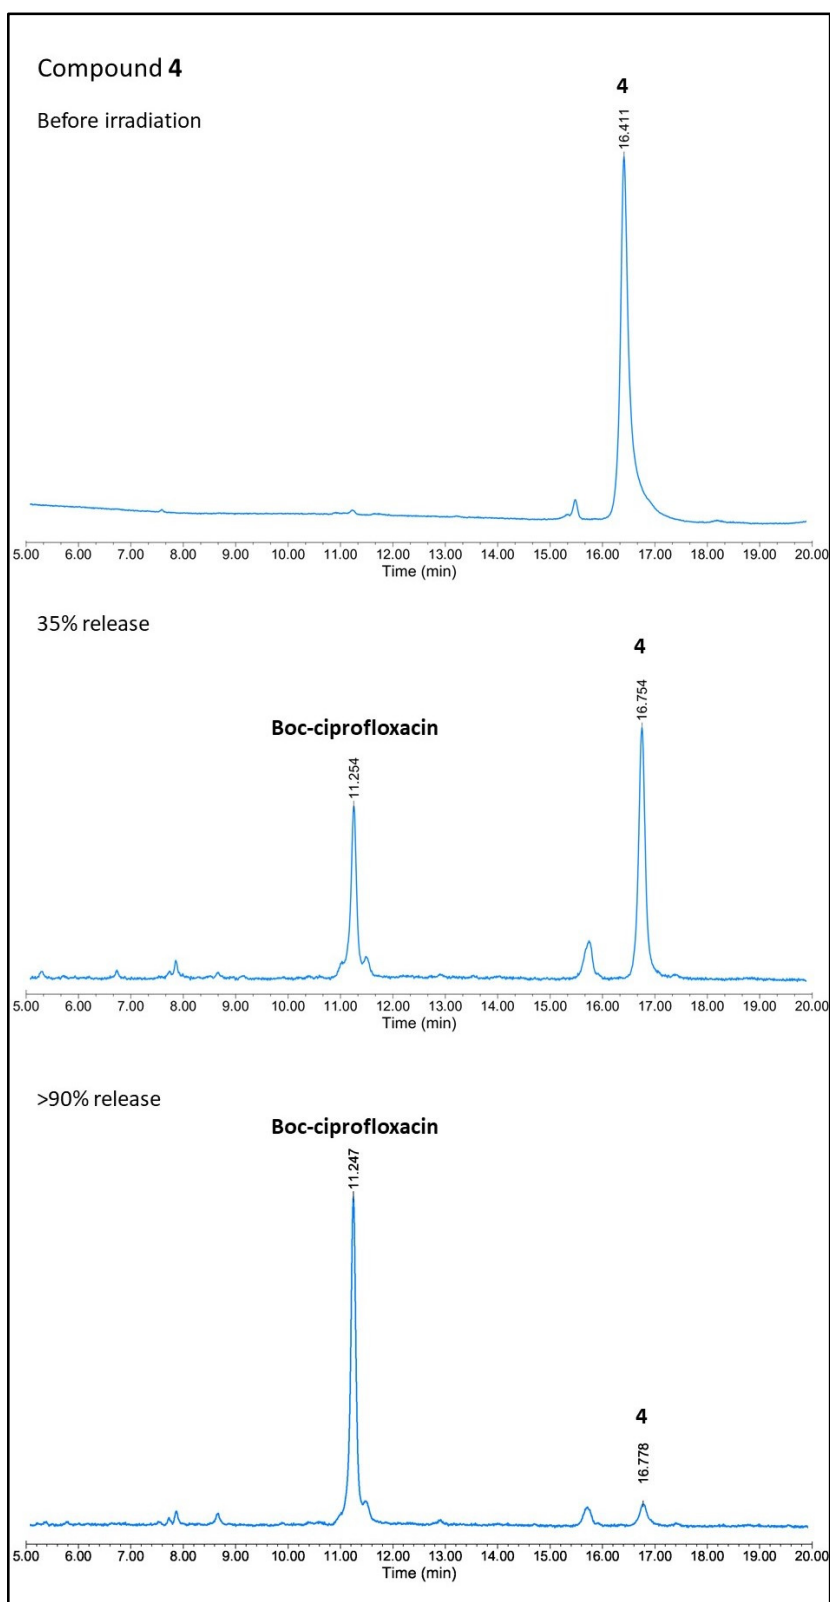

**Figure S6.** Release process of compound 4 upon irradiation with NIR light. The peak corresponding to compound 4 decreases while the peak of Boc-ciprofloxacin grows. Release yield > 90%.

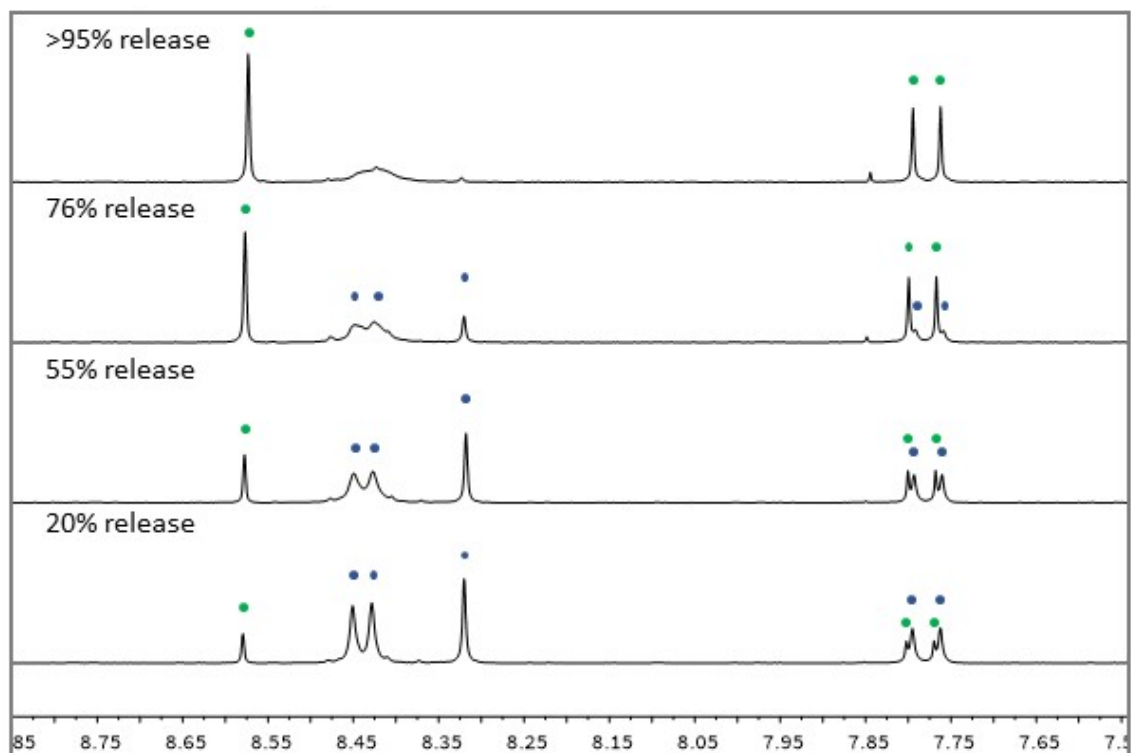

**Figure S7.** Release process of compound **5** upon irradiation with red light. The peaks corresponding to compound **5** (in blue) gradually disappear while the peaks of Boc-ciprofloxacin (in green) grow. Release yield > 95%.

## 5. Quantum yield measurements

The adequate light source was selected according to the sample under study. Compounds **1** and **2** were irradiated with green light using a 30W RGB LED. Compounds **3** and **4** were irradiated using a 515mW far-red LED. Compound **15** was irradiated with a 30W RGB LED in red light mode. The LED of choice was incorporated in the setup represented in Figure S8. Samples were prepared in a concentration close to  $5 \times 10^{-5}$  M and dissolved in different mixtures of DMSO and water according to their solubility (see Table S3). All samples were equipped with a magnetic stirrer to ensure homogeneous irradiation of the total volume. Prior to the irradiation process, the sample was analyzed by HPLC to check that the protected form of the antibiotic was being irradiated. The HPLC conditions for each compound can be found in the previous section.

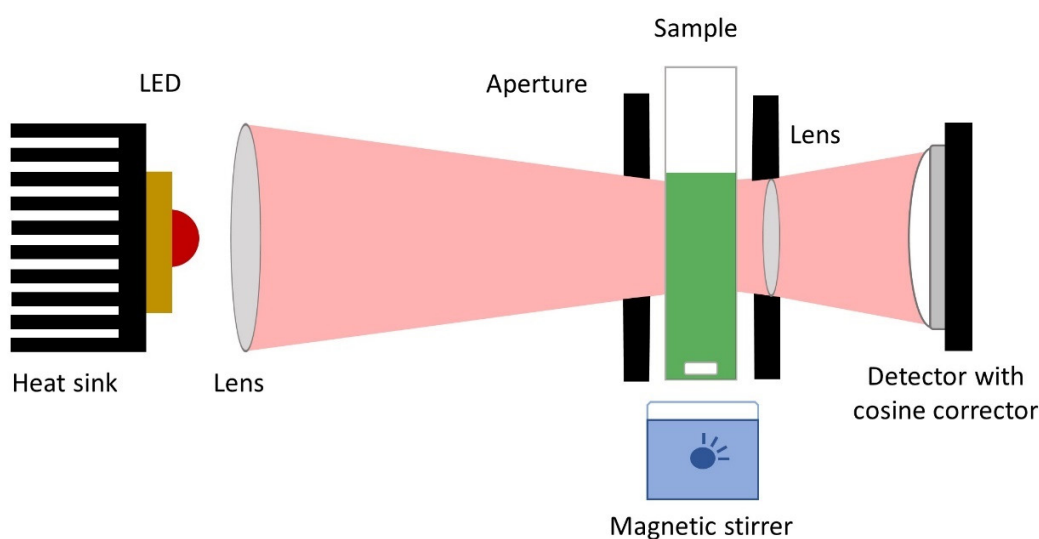

**Figure S8.** Schematic representation of the instrumental setup used to measure the quantum yield.<sup>3</sup> The light emitted by the LED is focused through a lens and imaged into the sample equipped with a magnetic stirrer. The radiation not absorbed by the sample is collected by a cosine corrector.

Once the LED was placed in the setup, the light was blocked with a laser dimming paper in front of the lens. This allowed the determination of the ambient light, which was later substrated from subsequent measurements. Next, the paper was removed, and a reference cuvette containing the solvent used to dissolve the samples was inserted. The light not absorbed by the sample was collected by a cosine corrector coupled to an Ocean Optics USB4000-UV-Vis detector. The transmitted radiant flux ( $P_{\text{ref}}$ ), was obtained in moles of photons·s<sup>-1</sup>·m<sup>-2</sup>.

Then, the reference was exchanged by a cuvette containing the sample that was irradiated for a determined time. During that time, the light not absorbed by the sample ( $P_{\text{sample}}$ ) was monitored by continuous acquisition of the transmitted radiant flux in moles of photons·s<sup>-1</sup>·m<sup>-2</sup>. Note that upon irradiation, the conversion from the protected antibiotic to the released form should be below 10% to avoid competitive absorption between the initial product and the byproduct of the photocage. After irradiation, the sample's conversion was quantified by HPLC, which allowed the calculation of the number of antibiotic molecules released.

The light absorbed by the sample can be calculated as the difference between the light not absorbed by the reference and the light not absorbed by the sample, as expressed in equation 1:

$$P_{\text{abs}} = P_{\text{ref}} - P_{\text{sample}}$$

**Equation 1.** Equation expressing the moles of photons·s<sup>-1</sup>·m<sup>-2</sup> absorbed by the sample.  $P_{\text{ref}}$  corresponds with the transmitted radiant flux measured for the reference with solvent,  $P_{\text{sample}}$  refers to the transmitted radiant flux recorded when the sample was inserted in the setup.

To conclude the experiment, the number of photons absorbed by the sample, as well as the number of molecules of antibiotic released, were introduced in equation 1 to obtain the quantum yield.

## 6. Determination of minimal inhibitory concentration (MIC)

The minimal inhibitory concentration (MIC) was determined by the microdilution method in cation adjusted Mueller-Hinton broth (Becton Dickinson).<sup>4</sup> *Escherichia coli* ATCC 25922 strain was cultured in Brain-Heart Infusion (BHI) agar (Becton Dickinson) for 24h at 37 °C. Overnight colonies of a pure culture on agar were used to prepare an inoculum adjusted to the turbidity of a 0.5 McFarland in sterile saline solution ( $1 \times 10^8$  CFU/ml). This suspension was diluted in cation adjusted Mueller-Hinton broth until a density of  $5 \times 10^5$  CFU/mL and exposed to a serial twofold dilution of each compound tested (0.03-32 mg/L) with a final volume of 0.1 mL in a 96 well microdilution tray. The MIC value was determined as the lowest concentration of compound where no visible growth was apparent. Positive (with bacteria and cation adjusted Mueller-Hinton broth) and negative (only with cation adjusted Mueller-Hinton broth) control wells were included in all assays. Moreover, control tests of solvents (mixtures of water and DMSO 40:60 or 20:80) were included to check the survival of the bacterium in these concentrations.

In the experiments in which the compounds were activated in presence of the bacteria, for the irradiation of the plates, we used a 100W RGB LED in green mode and a 50W RGB LED in red mode. The plates were placed on top of each LED and inside an incubator at a controlled temperature of 37 °C (Figure S9). The irradiation of the plates took place for an hour. After that time, the LEDS were switched off and the plates were kept in the incubator for a total time of 24 hours.

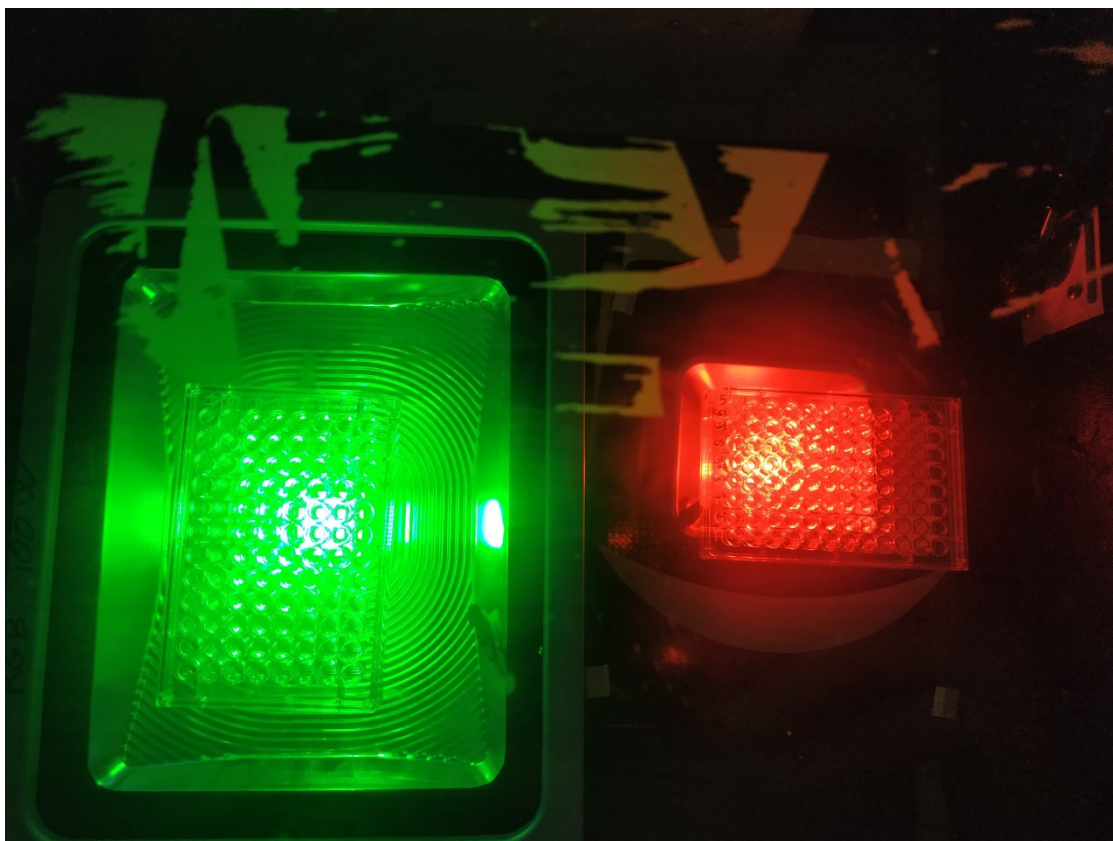

**Figure S9** . Irradiation of the photoreleasable quinolones in a biological environment. On the left, compound **2** irradiated with green light. On the right, compound **5** irradiated with red light.

## 7. Characterization data

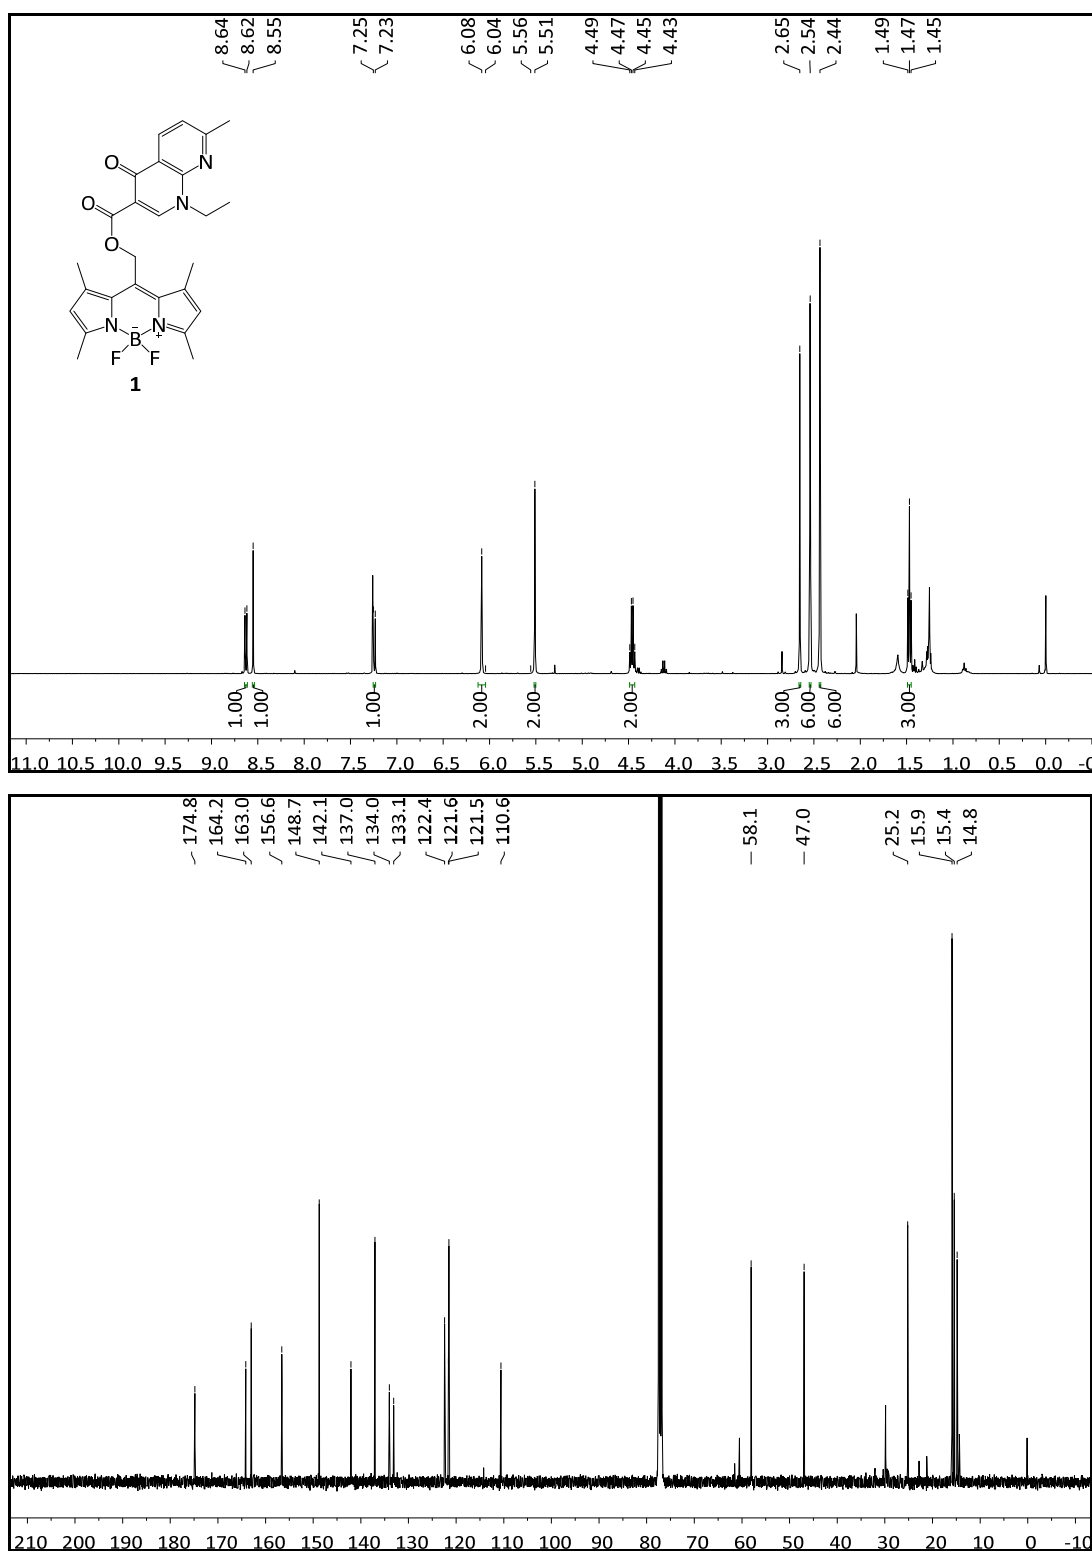

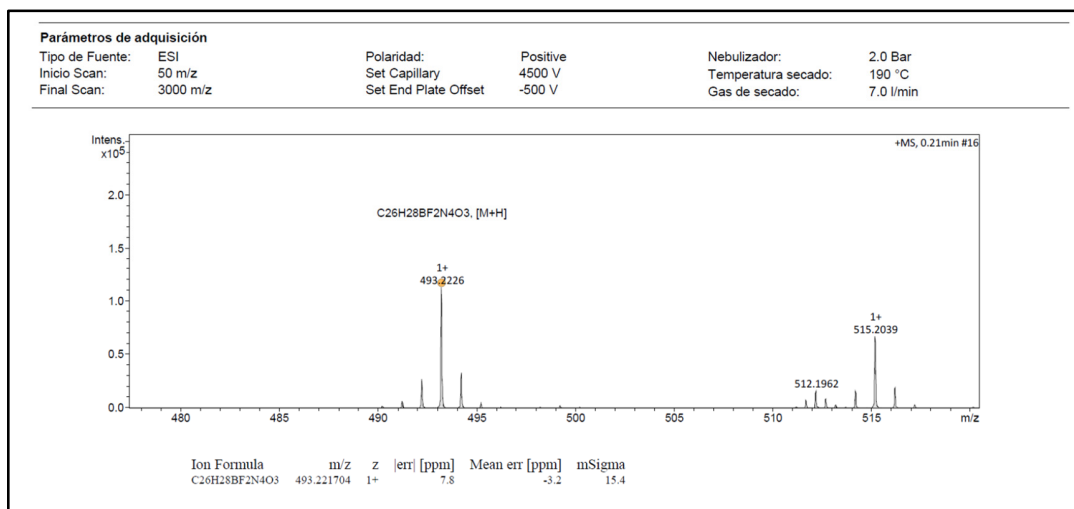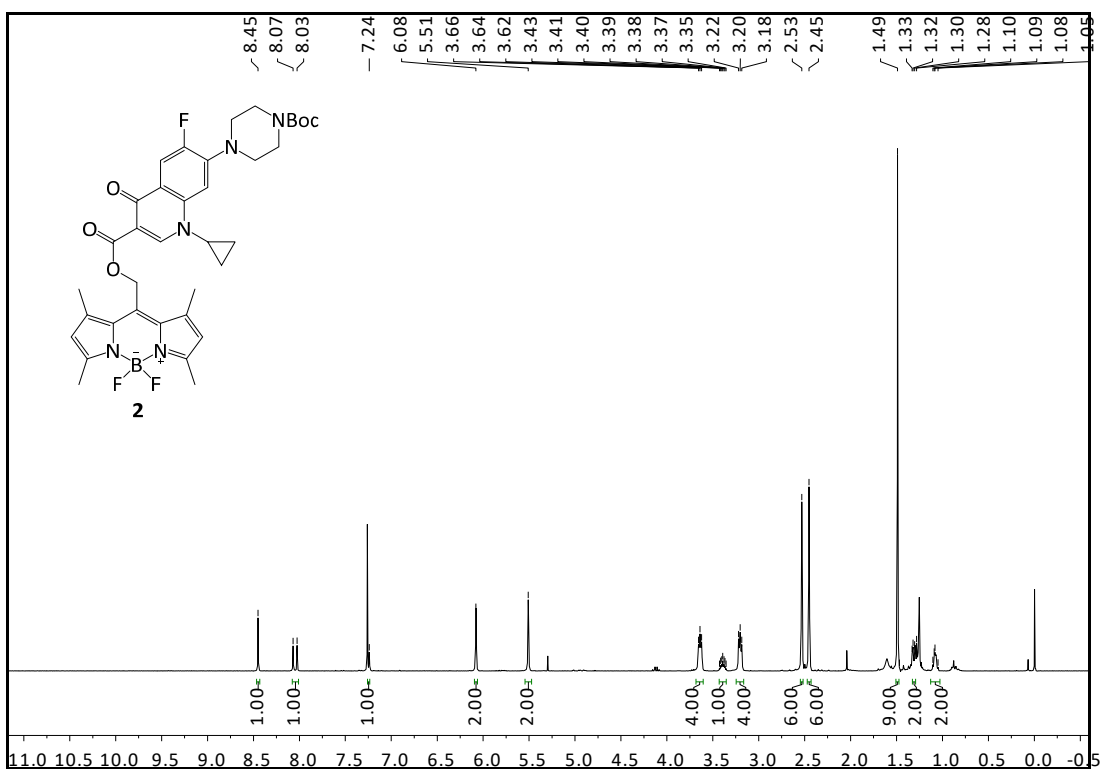



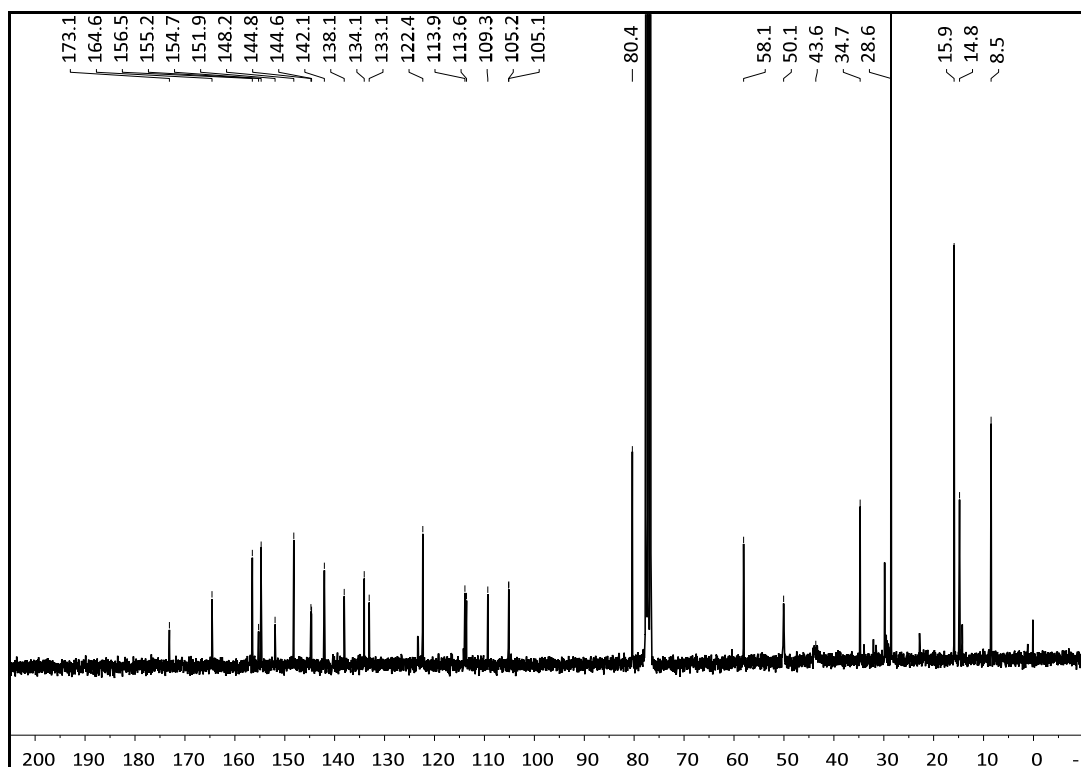

#### Parámetros de adquisición

Tipo de Fuente: ESI  
 Inicio Scan: 50 m/z  
 Final Scan: 3000 m/z

Polaridad: Positive  
 Set Capillary: 4500 V  
 Set End Plate Offset: -500 V

Nebulizador: 2.0 Bar  
 Temperatura secado: 190 °C  
 Gas de secado: 7.0 l/min

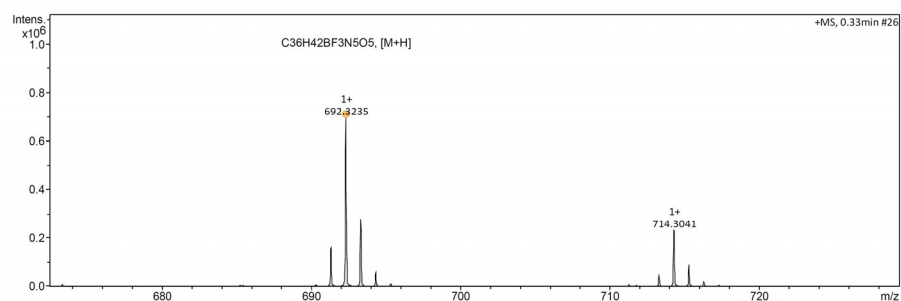

| Ion Formula                                                                   | m/z        | z  | [err] [ppm] | Mean err [ppm] | mSigma |
|-------------------------------------------------------------------------------|------------|----|-------------|----------------|--------|
| C <sub>36</sub> H <sub>42</sub> BF <sub>3</sub> N <sub>5</sub> O <sub>5</sub> | 692.322561 | 1+ | 0.4         | 1.2            | 4.7    |

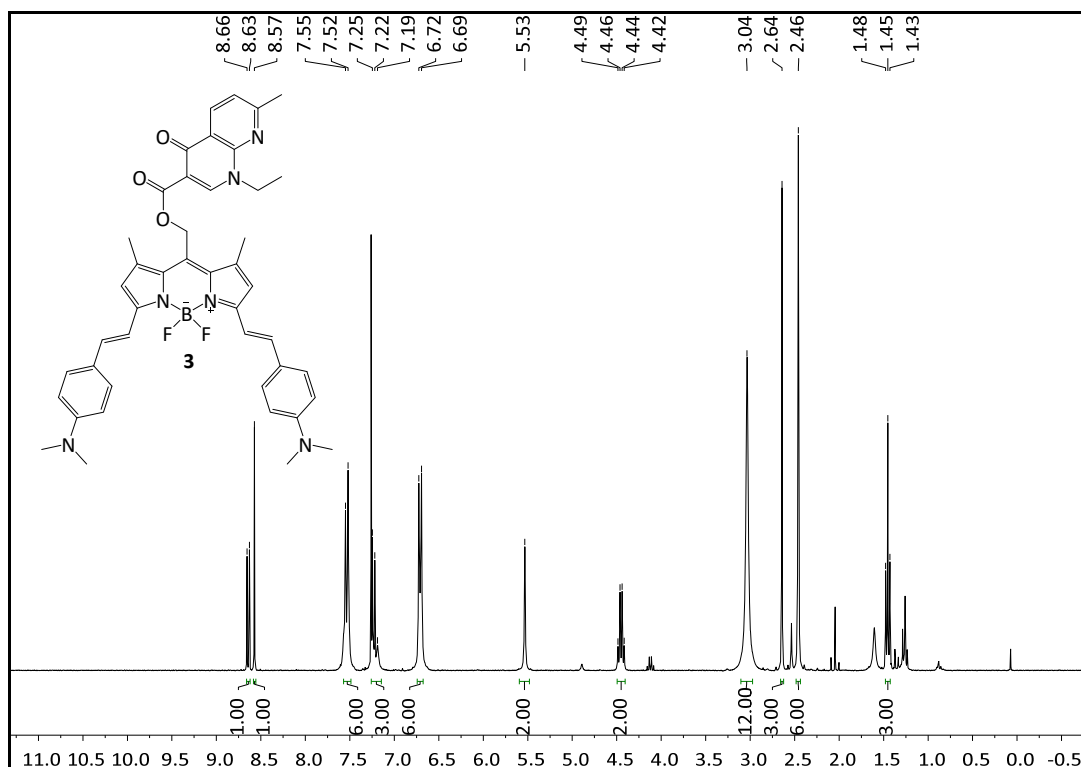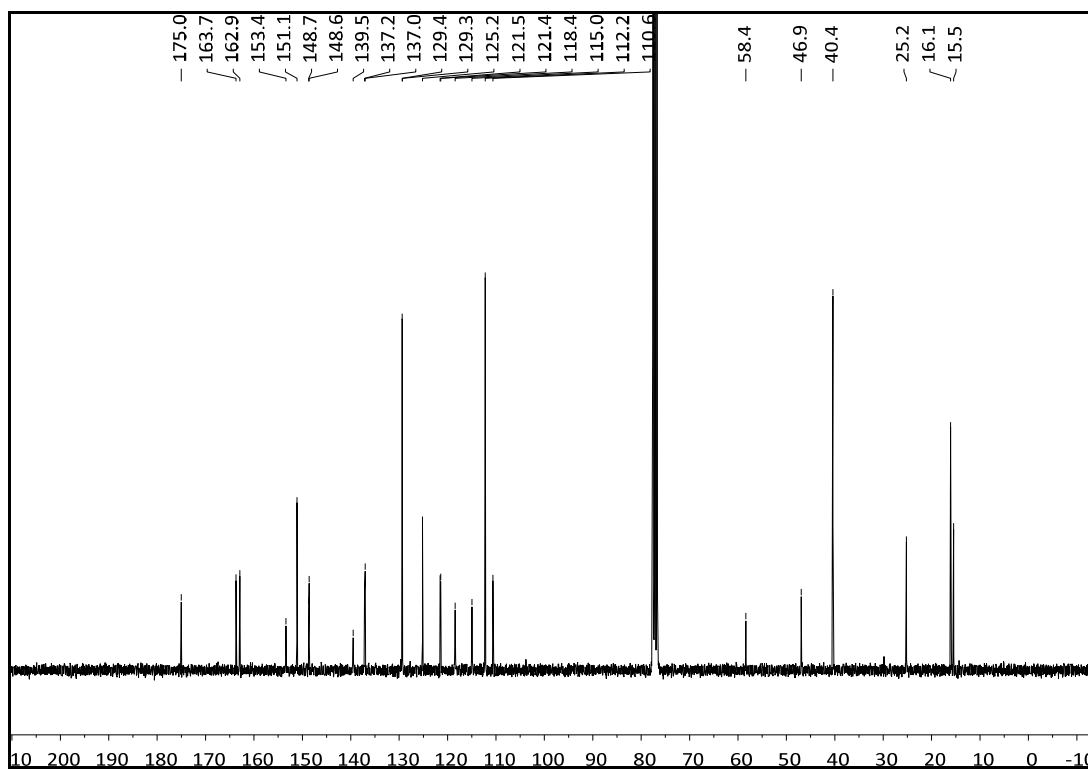

**Parámetros de adquisición**

Tipo de Fuente: ESI  
 Inicio Scan: 50 m/z  
 Final Scan: 3000 m/z

Polaridad: Positive  
 Set Capillary: 4500 V  
 Set End Plate Offset: -500 V

Nebulizador: 2.0 Bar  
 Temperatura secado: 190 °C  
 Gas de secado: 7.0 l/min

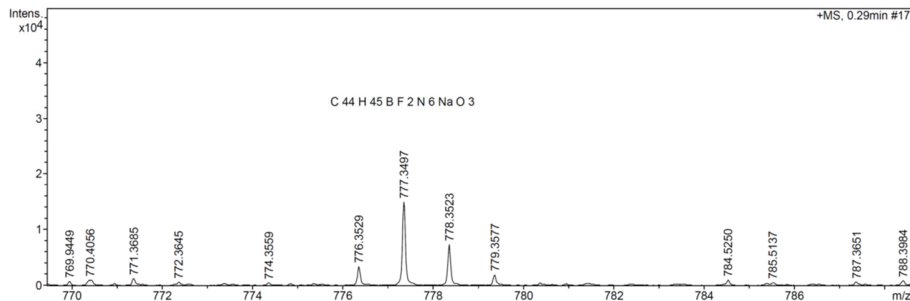

| Formula                                                                         | m/z      | z  | err  [ppm] | Mean err [ppm] | mSigma |
|---------------------------------------------------------------------------------|----------|----|------------|----------------|--------|
| C <sub>44</sub> H <sub>45</sub> BF <sub>2</sub> N <sub>6</sub> NaO <sub>3</sub> | 777.3514 | 1+ | 1.2        | 1.5            | 10.2   |

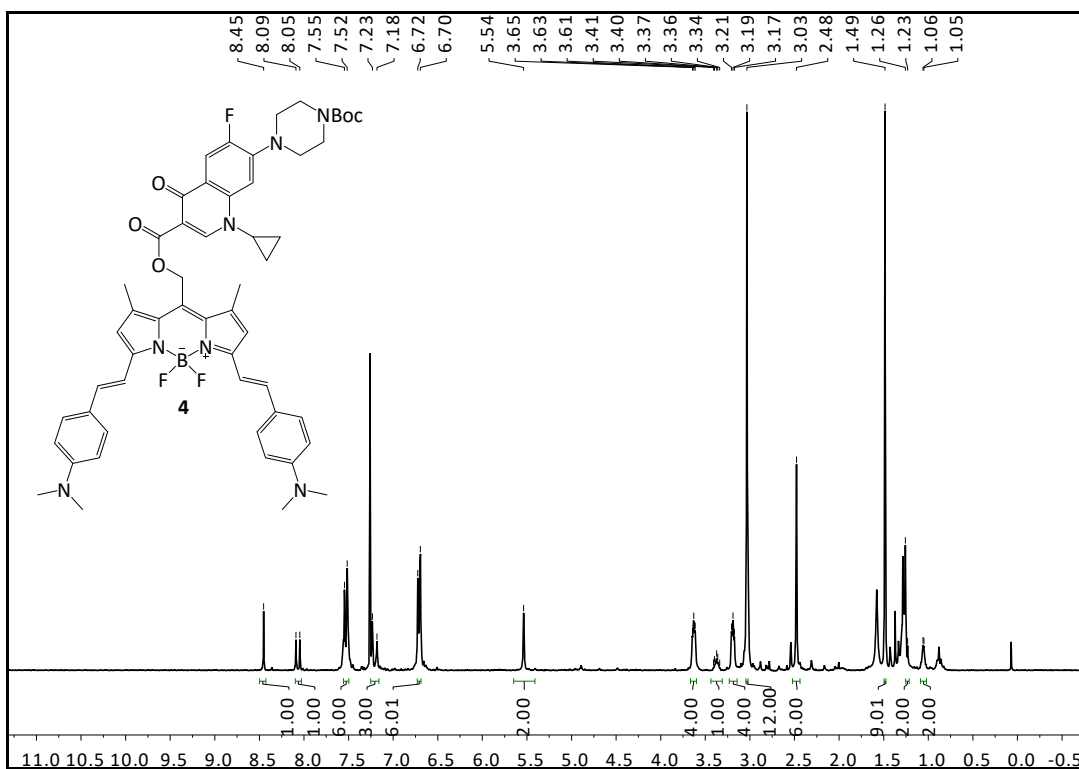

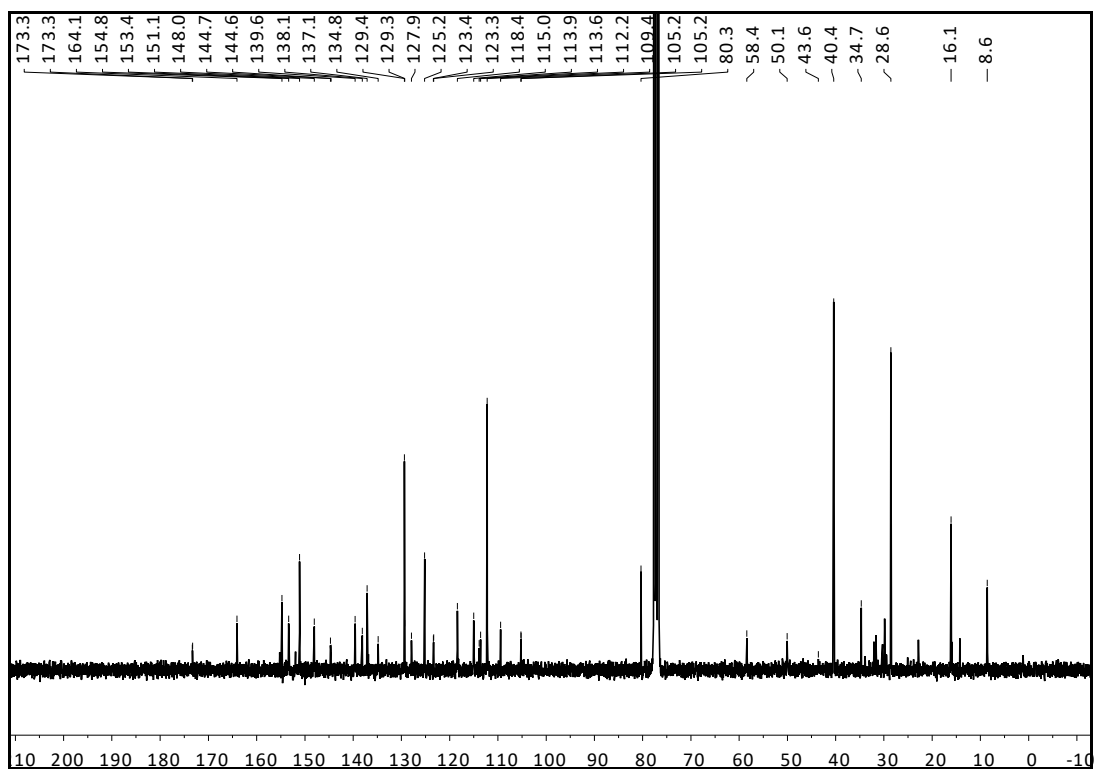

#### Parámetros de adquisición

Tipo de Fuente: ESI  
 Inicio Scan: 50 m/z  
 Final Scan: 3000 m/z

Polaridad: Positive  
 Set Capillary: 4500 V  
 Set End Plate Offset: -500 V

Nebulizador: 2.0 Bar  
 Temperatura secado: 190 °C  
 Gas de secado: 7.0 l/min

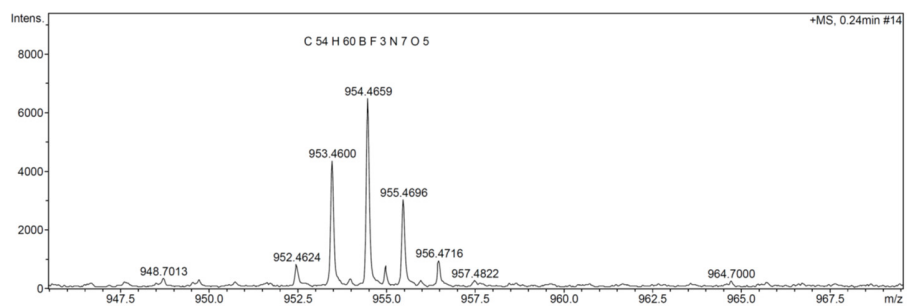

Formula: C54H60BF3N7O5  
 m/z: 954.4704  
 z: 1+  
 |err| [ppm]: 3.8  
 Mean err [ppm]: 7.0  
 mSigma: 193.0

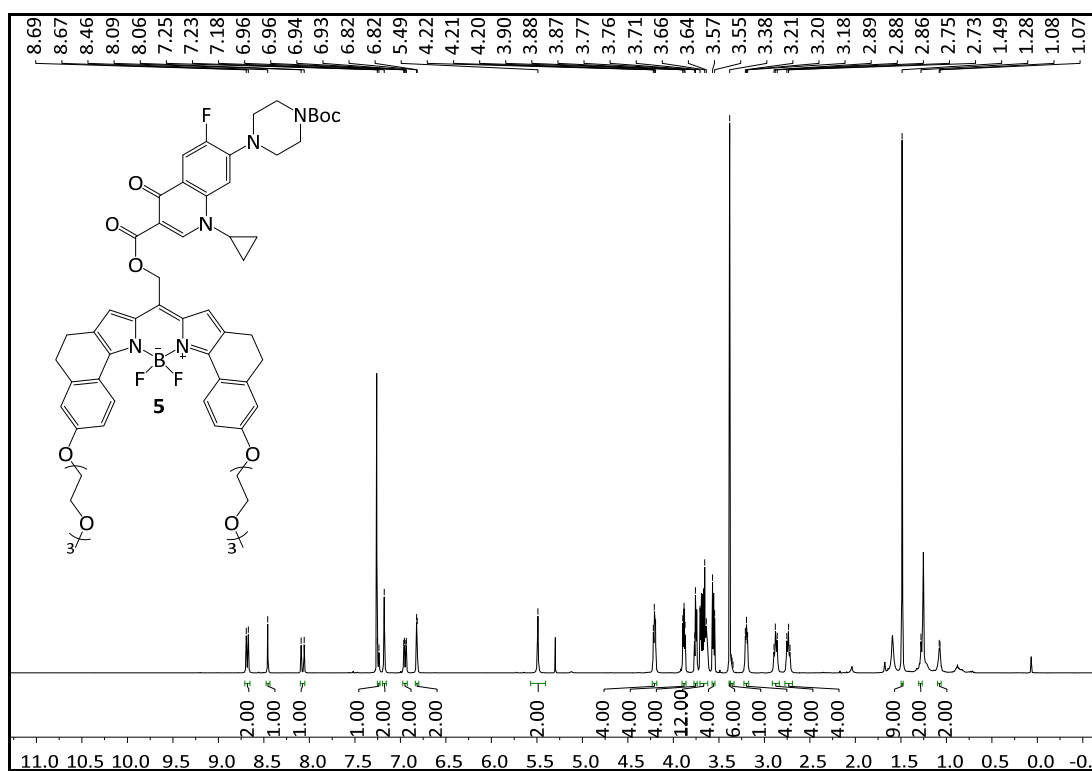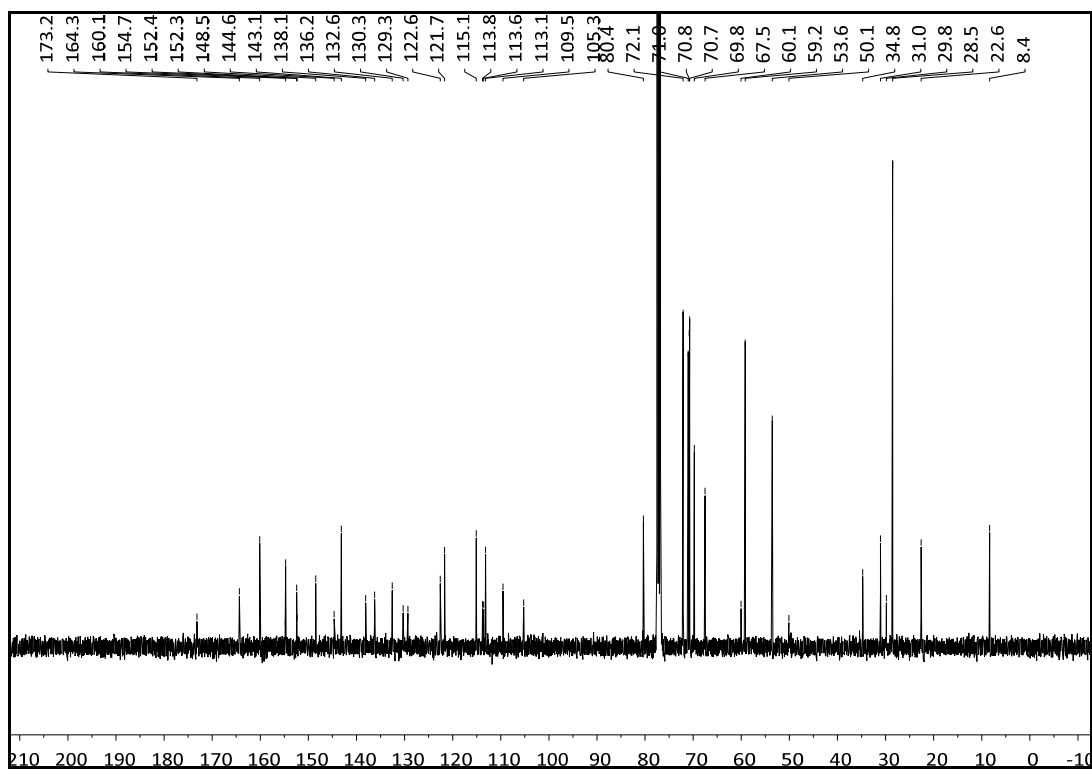

Sample Name  
User Name  
Sample Type  
ACQ Method

18  
CIF-PC\admin  
Sample  
ESI3.m

Position  
Inj Vol  
IRM Calibration Status  
Comment

Vial 1  
1  
Success

Instrument Name  
InjPosition  
Data Filename  
Acquired Time

QTOF  
QTOF1918585.d  
11/19/2019 2:49:37 PM

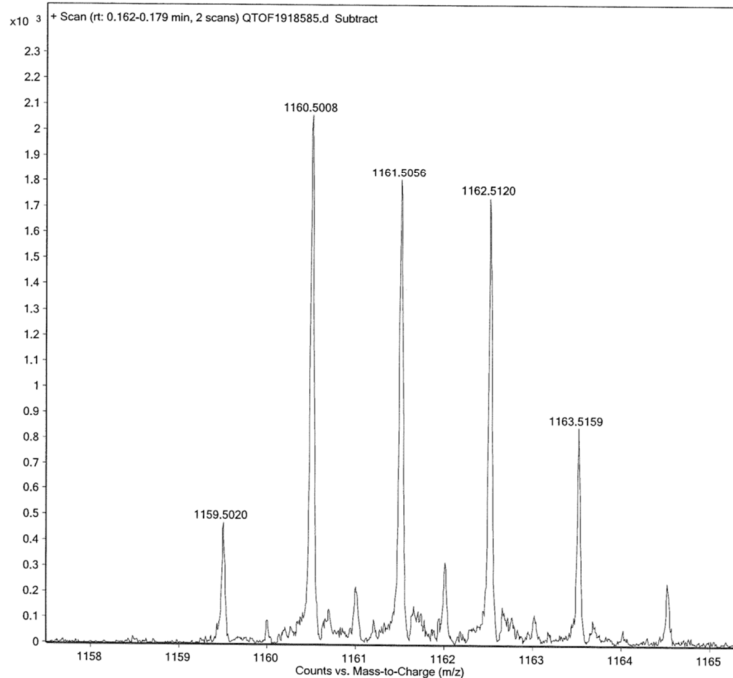

| Formula (M)         | m/z      | m/z (Calc) | Diff (ppm) |
|---------------------|----------|------------|------------|
| C62 H69 B F3 N5 O13 | 1159.502 | 1159.5046  | 2.25       |

## 8. Computational Results

### Computational Methods

The geometries have been optimized in the ground state ( $S_0$ ) at the B3LYP<sup>5,6</sup>/6-31+g(d) level of theory. A single point calculation in the  $S_0$  minimum has been performed at the CAM-B3LYP<sup>7</sup>/6-31+g(d) level of theory to compute the excitation energies and evaluate the electronic nature of the  $S_0 \rightarrow S_1$  transition. To analyze the photorelease path, both optimizations and relaxed scans along the photorelease coordinate (C-O distance) have been performed in  $S_1$  and  $T_1$ . Calculations in the ground state ( $S_0$ ) and first triplet state ( $T_1$ ) have been performed with the B3LYP functional whereas the ones performed in the first singlet excited state ( $S_1$ ) were performed with the CAM-B3LYP functional. In all cases, the 6-31+g(d) has been selected as the basis set. Moreover, we have also evaluated the solvent effect considering it in two different ways: on one hand implicitly (dichloromethane, DMSO and water) by applying the polarizable continuum model through the integral equation formalism variant (IEF-PCM<sup>8</sup>); on the other hand, two water molecules were explicitly included while keeping the IEF-PCM implicit water description for the surroundings. Frequency calculations have been performed to verify the minimum or transition state character of the optimized stationary points and to get the free energies. The density functional theory (DFT) and its time-dependent version (TD-DFT) were applied for ground and excited states, respectively, as implemented in Gaussian 16 software.<sup>9</sup> It should be remarked that for **5**, the tetraoxaundecane chain present in the synthetic analogue has been simplified with a methoxy group, to decrease the computational time. This simplification should not influence the absorption energy neither the mechanism, as the chain does not contribute to the electronic conjugation extent of the chromophore. The spin-orbit coupling values were computed at the CAM-B3LYP/def2-SVPD level of theory, including water as implicit solvent by the conductor-like polarizable continuum model, CPCM, as implemented in Orca 4.2.1.<sup>12</sup>

The electronic nature of the vertical transition has been analyzed for the three compounds studied from a computational point of view, compounds **2**, **4** and **5**. In all cases the first singlet excited state is optically bright (large oscillation strength value,  $f$ , in Table S4) and corresponds to a  $\pi, \pi^*$  electronic transition (Figure S10). As experimentally observed, the computed absorption energy of **4** is smaller (that is the wavelength is longer) compared to **5**, whereas the one computed for compound **2** is the largest (shorter wavelength).

**Table S4.** Experimental and computed absorption ( $S_0 \rightarrow S_1$ ) energies in eV (nm) and the corresponding oscillator strength ( $f$ ), considering dichloromethane as the solvent.

| Compound                              | <b>2</b>   | <b>4</b>   | <b>5</b>   |
|---------------------------------------|------------|------------|------------|
| Experimental $\lambda_{\max}$ eV (nm) | 2.38 (520) | 1.67 (744) | 1.85 (671) |
| Computed Excitation energy eV (nm)    | 2.74 (452) | 1.87 (663) | 2.09 (592) |
| $f$                                   | 0.628      | 1.197      | 0.904      |

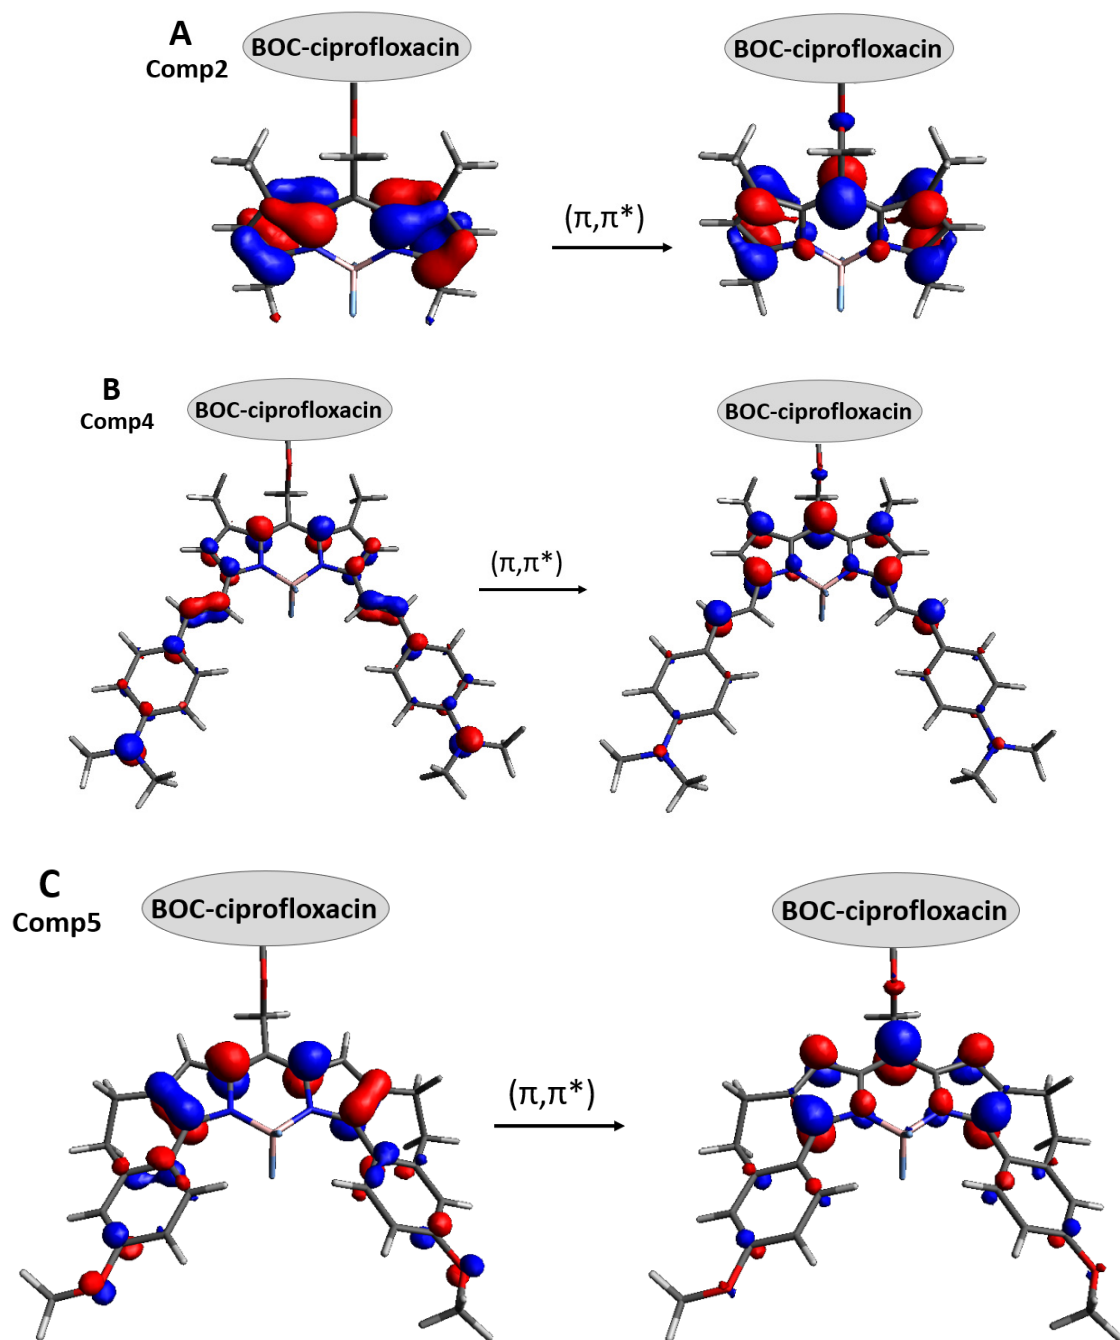

**Figure S10.** Molecular orbitals involved in the  $S_0 \rightarrow S_1$  vertical transition of compound A) 2, B) 4 and C) 5.



In addition, relaxed scans have been performed from the  $S_1$  and  $T_1$  minima (Figures S11 and S12, respectively), considering diverse solvents. In particular, the solvents tested are implicit dichloromethane, DMSO and water and explicit water.

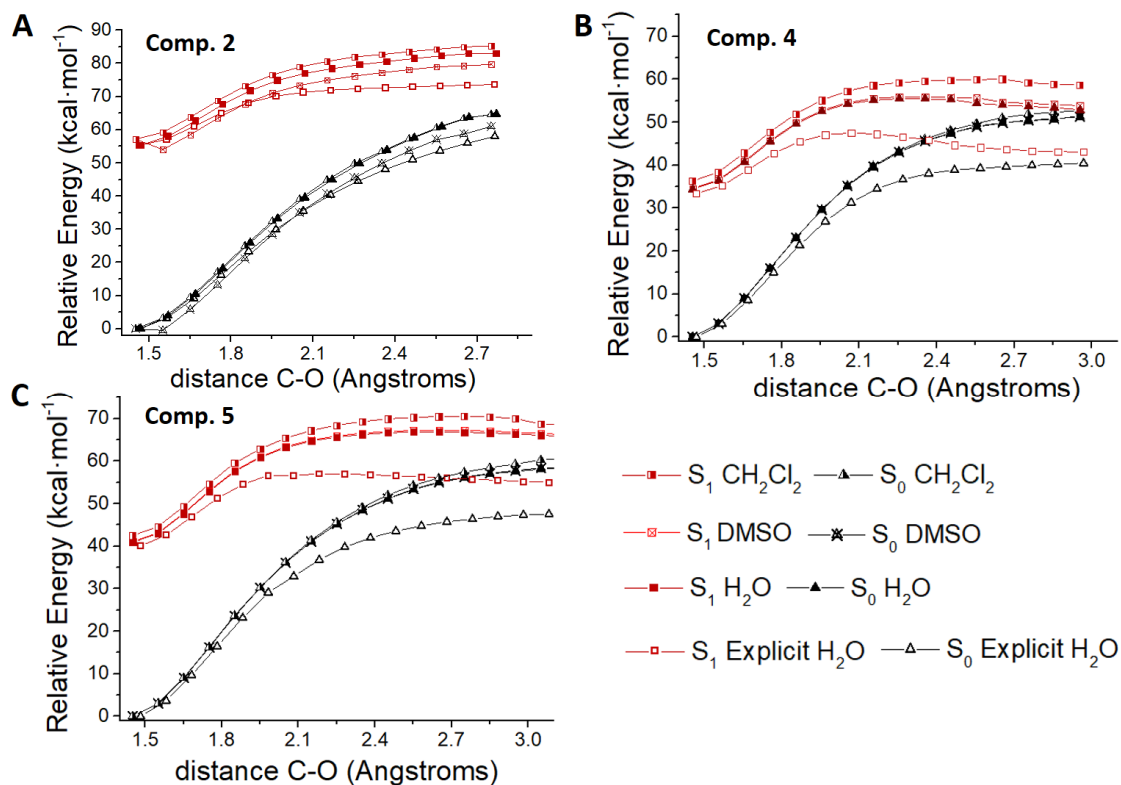

**Figure S11.** Relaxed scan along the photorelease coordinate (distance C-O) in  $S_1$  considering diverse solvents for A) compound **2**, B) **4** and C) **5**.

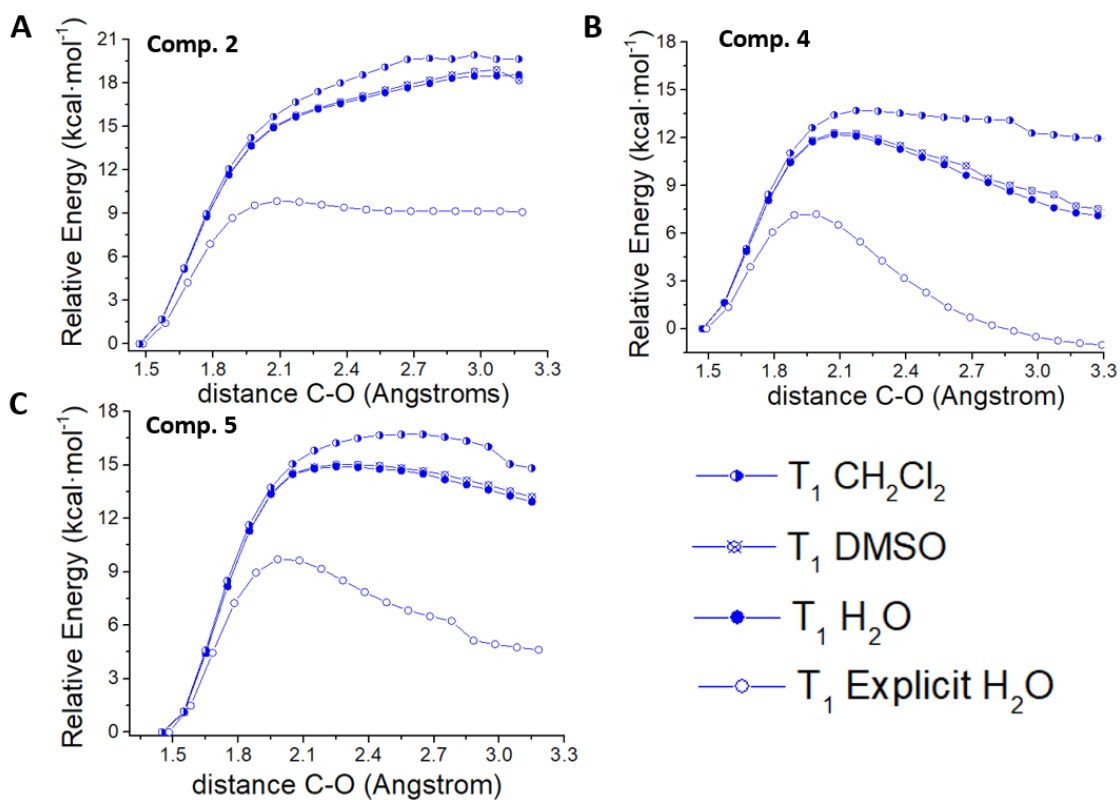

**Figure S12.** Relaxed scan along the photorelease coordinate (distance C-O) in  $T_1$  considering diverse solvents for A) compound **2**, B) **4** and C) **5**.

**Table S5.** Energy of the first triplet ( $T_1$ ) and singlet excited state ( $S_1$ ) relative to the ground state ( $S_0$ ) computed at the  $S_1$  minimum. The results shown have been computed considering explicit water as the solvent.

| Comp.    | Solvent        | Relative $S_0$<br>energy<br>(kcal/mol) | Relative $S_1$<br>energy<br>(kcal/mol) | Relative $T_1$<br>energy<br>(kcal/mol) | $\Delta E_{S_1-T_1}$<br>(kcal/mol) |
|----------|----------------|----------------------------------------|----------------------------------------|----------------------------------------|------------------------------------|
| <b>2</b> | Explicit water | 0                                      | 55.3                                   | 29.7                                   | 25.6                               |
|          | Implicit water | 0                                      | 55.5                                   | 30.5                                   | 25.0                               |
| <b>4</b> | Explicit water | 0                                      | 33.4                                   | 16.7                                   | 16.7                               |
|          | Implicit water | 0                                      | 34.4                                   | 17.7                                   | 16.7                               |
| <b>5</b> | Explicit water | 0                                      | 45.9                                   | 21.7                                   | 24.2                               |
|          | Implicit water | 0                                      | 46.5                                   | 22.6                                   | 23.9                               |

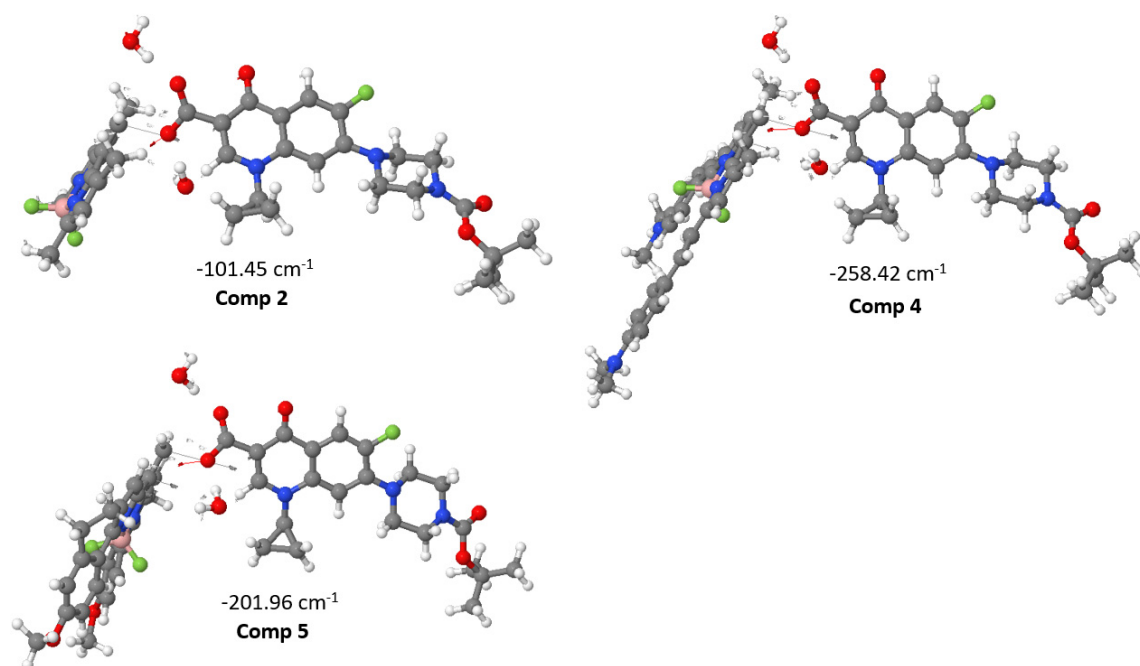

**Figure S13.** Transition state structures optimized in  $T_1$  considering explicit water molecules as the solvent. The vector of the negative frequency corresponds to the photorelease process.

**Table S6.** Charge analysis for the ciprofloxacin, PPG and, when applying, the water molecules computed for the minimum, transition state and products in  $T_1$ . The charge of each moiety is computed as the sum of the Mulliken charges of each atom included in the moiety.

|   |                      | Min $T_1$      |                | TS $T_1$       |                | Products $T_1$ |                |
|---|----------------------|----------------|----------------|----------------|----------------|----------------|----------------|
|   |                      | Implicit water | Explicit water | Implicit water | Explicit water | Implicit water | Explicit water |
| 2 | <i>Ciprofloxacin</i> | -0.59          | -0.45          | -              | -0.87          | -0.97          | -0.97          |
|   | <i>PPG</i>           | 0.59           | 0.25           | -              | 0.76           | 0.97           | 1.00           |
|   | <i>WAT1</i>          |                | 0.16           |                | 0.09           |                | -0.006         |
|   | <i>WAT2</i>          |                | 0.04           |                | 0.02           |                | -0.03          |
| 4 | <i>Ciprofloxacin</i> | -0.71          | -0.47          | -0.85          | -0.81          | -1.0           | -0.98          |
|   | <i>PPG</i>           | 0.71           | 0.26           | 0.85           | 0.64           | 1.0            | 1.00           |
|   | <i>WAT1</i>          | -              | 0.17           | -              | 0.14           |                | 0.00           |
|   | <i>WAT2</i>          | -              | 0.04           | -              | 0.03           |                | -0.02          |
| 5 | <i>Ciprofloxacin</i> | -0.49          | -0.43          | -0.87          | -0.81          | -0.95          | -0.94          |
|   | <i>PPG</i>           | 0.49           | 0.24           | 0.87           | 0.68           | 0.95           | 0.99           |
|   | <i>WAT1</i>          | -              | 0.16           | -              | 0.11           | -              | -0.01          |
|   | <i>WAT2</i>          | -              | 0.03           | -              | 0.02           | -              | -0.04          |

**Table S7.**  $S_1$ -  $T_1$  spin-orbit coupling values (in  $\text{cm}^{-1}$ ) calculated at the CAM-B3LYP/def2-SVPD level of theory, including water as implicit solvent, without (implicit) or with (micro-solvation) two explicit water molecules.

| Solvation method | Compound 2 | Compound 4 | Compound 5 |
|------------------|------------|------------|------------|
| Micro-solvation  | 0.118      | 0.024      | 0.037      |
| Implicit         | 0.118      | 0.022      | 0.051      |

## 9. Cartesian Coordinates

| Compound 2                 |           |          |           |  |  |                            |           |          |           |  |  |
|----------------------------|-----------|----------|-----------|--|--|----------------------------|-----------|----------|-----------|--|--|
| Min $S_0$ (implicit water) |           |          |           |  |  | Min $S_1$ (implicit water) |           |          |           |  |  |
| 6                          | -1.948701 | 0.940695 | -0.221898 |  |  | 6                          | -2.192738 | 0.949198 | -0.294893 |  |  |
| 6                          | -2.556749 | 2.120571 | 0.248514  |  |  | 6                          | -2.696932 | 2.179861 | 0.177083  |  |  |
| 6                          | -2.500179 | 3.083773 | -0.755056 |  |  | 6                          | -2.501460 | 3.146427 | -0.793010 |  |  |
| 7                          | -1.511791 | 1.147623 | -1.486180 |  |  | 7                          | -1.685472 | 1.135118 | -1.537707 |  |  |
| 6                          | -1.833667 | 2.461177 | -1.866237 |  |  | 6                          | -1.862971 | 2.472378 | -1.900543 |  |  |
| 1                          | -2.988178 | 2.247429 | 1.233678  |  |  | 1                          | -3.150449 | 2.327058 | 1.149402  |  |  |
| 6                          | -3.039562 | 4.477490 | -0.601256 |  |  | 6                          | -2.874019 | 4.588524 | -0.657052 |  |  |
| 1                          | -3.357468 | 4.632197 | 0.434215  |  |  | 1                          | -3.119680 | 4.804772 | 0.386081  |  |  |
| 1                          | -3.914867 | 4.656546 | -1.238505 |  |  | 1                          | -3.754217 | 4.851362 | -1.256555 |  |  |
| 1                          | -2.293508 | 5.243376 | -0.837279 |  |  | 1                          | -2.059744 | 5.255993 | -0.955006 |  |  |
| 5                          | -0.798782 | 0.109968 | -2.380905 |  |  | 5                          | -1.062326 | 0.046956 | -2.419141 |  |  |
| 7                          | -0.425213 | 0.811826 | -3.704715 |  |  | 7                          | -0.501427 | 0.739374 | -3.666234 |  |  |
| 6                          | -1.477890 | 2.935858 | -3.140604 |  |  | 6                          | -1.438218 | 2.944427 | -3.167046 |  |  |
| 6                          | -0.766136 | 2.130829 | -4.046897 |  |  | 6                          | -0.687539 | 2.082040 | -4.003710 |  |  |
| 6                          | -1.868398 | 4.337648 | -3.545115 |  |  | 6                          | -1.764866 | 4.331723 | -3.607130 |  |  |
| 6                          | 0.258970  | 0.258287 | -4.733387 |  |  | 6                          | 0.226128  | 0.141492 | -4.640792 |  |  |
| 6                          | -0.245847 | 2.386841 | -5.362101 |  |  | 6                          | -0.005737 | 2.318391 | -5.255808 |  |  |
| 6                          | 0.383966  | 1.211446 | -5.762278 |  |  | 6                          | 0.540095  | 1.102271 | -5.625457 |  |  |
| 6                          | -0.298164 | 3.630815 | -6.202459 |  |  | 6                          | 0.136575  | 3.593552 | -6.024261 |  |  |
| 1                          | 0.894320  | 1.047342 | -6.703179 |  |  | 1                          | 1.125724  | 0.903963 | -6.514535 |  |  |
| 1                          | -1.313510 | 3.849396 | -6.557041 |  |  | 1                          | -0.788876 | 3.875933 | -6.541029 |  |  |
| 1                          | 0.331178  | 3.498553 | -7.087706 |  |  | 1                          | 0.908027  | 3.473416 | -6.789599 |  |  |
| 1                          | 0.064084  | 4.513294 | -5.665388 |  |  | 1                          | 0.426837  | 4.432267 | -5.384233 |  |  |
| 8                          | -0.777804 | 5.215829 | -3.173539 |  |  | 8                          | -0.707969 | 5.227135 | -3.175656 |  |  |
| 1                          | -2.778472 | 4.661810 | -3.045843 |  |  | 1                          | -2.704854 | 4.676939 | -3.181358 |  |  |
| 1                          | -2.040386 | 4.412427 | -4.616611 |  |  | 1                          | -1.853492 | 4.399320 | -4.689441 |  |  |
| 6                          | -0.951197 | 6.540392 | -3.462479 |  |  | 6                          | -0.865823 | 6.532236 | -3.498112 |  |  |
| 6                          | 0.186824  | 7.361544 | -3.002821 |  |  | 6                          | 0.240524  | 7.369898 | -2.999135 |  |  |
| 8                          | -1.952385 | 6.942615 | -4.031755 |  |  | 8                          | -1.831464 | 6.918593 | -4.128001 |  |  |
| 6                          | 0.362453  | 8.743632 | -3.442136 |  |  | 6                          | 0.333806  | 8.786986 | -3.313231 |  |  |
| 6                          | 1.100170  | 6.798022 | -2.130427 |  |  | 6                          | 1.205432  | 6.783827 | -2.212325 |  |  |
| 7                          | 2.158941  | 7.441447 | -1.601568 |  |  | 7                          | 2.252611  | 7.424716 | -1.673181 |  |  |
| 1                          | 0.987048  | 5.770140 | -1.814947 |  |  | 1                          | 1.147753  | 5.728901 | -1.983290 |  |  |
| 6                          | 1.557127  | 9.407863 | -2.882861 |  |  | 6                          | 1.519633  | 9.454842 | -2.747073 |  |  |
| 8                          | -0.387498 | 9.341365 | -4.235658 |  |  | 8                          | -0.475537 | 9.419882 | -4.003367 |  |  |
| 6                          | 2.435518  | 8.765000 | -1.984847 |  |  | 6                          | 2.456677  | 8.781608 | -1.952439 |  |  |
| 6                          | 3.070644  | 6.722767 | -0.718664 |  |  | 6                          | 3.225955  | 6.681420 | -0.893031 |  |  |
| 6                          | 2.525213  | 5.781336 | 0.321483  |  |  | 6                          | 2.754756  | 5.657890 | 0.095057  |  |  |

|                                     |           |           |           |                                          |           |           |           |
|-------------------------------------|-----------|-----------|-----------|------------------------------------------|-----------|-----------|-----------|
| 6                                   | 3.148916  | 7.088897  | 0.742785  | 6                                        | 3.353169  | 6.947578  | 0.578958  |
| 1                                   | 3.994524  | 6.439093  | -1.217218 | 1                                        | 4.133958  | 6.465633  | -1.449193 |
| 1                                   | 2.475967  | 7.864150  | 1.098119  | 1                                        | 2.673527  | 7.675694  | 1.010368  |
| 1                                   | 4.131652  | 7.086267  | 1.205520  | 1                                        | 4.352235  | 6.944546  | 1.002587  |
| 1                                   | 3.073984  | 4.857669  | 0.478700  | 1                                        | 3.336102  | 4.745127  | 0.168425  |
| 1                                   | 1.448432  | 5.690226  | 0.427918  | 1                                        | 1.686796  | 5.525307  | 0.233505  |
| 6                                   | 1.844288  | 10.735682 | -3.253251 | 6                                        | 1.726893  | 10.817445 | -3.010027 |
| 6                                   | 2.952292  | 11.369952 | -2.755309 | 6                                        | 2.823099  | 11.453735 | -2.506484 |
| 6                                   | 3.874842  | 10.745128 | -1.875437 | 6                                        | 3.806717  | 10.798496 | -1.730830 |
| 6                                   | 3.580420  | 9.426105  | -1.505800 | 6                                        | 3.591290  | 9.448521  | -1.467168 |
| 1                                   | 1.167566  | 11.258963 | -3.919934 | 1                                        | 0.997694  | 11.361984 | -3.598642 |
| 1                                   | 4.257210  | 8.900428  | -0.848735 | 1                                        | 4.318941  | 8.900266  | -0.888438 |
| 9                                   | 3.154348  | 12.676790 | -3.093686 | 9                                        | 2.958297  | 12.786110 | -2.731615 |
| 7                                   | 4.972488  | 11.452257 | -1.373241 | 7                                        | 4.895142  | 11.512216 | -1.225612 |
| 6                                   | 5.919393  | 12.020832 | -2.354845 | 6                                        | 5.761845  | 12.178611 | -2.208122 |
| 6                                   | 5.679101  | 10.887980 | -0.219409 | 6                                        | 5.681865  | 10.883107 | -0.170184 |
| 6                                   | 6.786528  | 13.097616 | -1.708333 | 6                                        | 6.626841  | 13.229319 | -1.531753 |
| 1                                   | 5.370447  | 12.459885 | -3.186881 | 1                                        | 5.153741  | 12.658020 | -2.973018 |
| 1                                   | 6.562195  | 11.217052 | -2.751517 | 1                                        | 6.405812  | 11.430618 | -2.697812 |
| 6                                   | 6.544021  | 11.957139 | 0.451713  | 6                                        | 6.547820  | 11.920374 | 0.533633  |
| 1                                   | 6.314438  | 10.035773 | -0.516113 | 1                                        | 6.324124  | 10.082731 | -0.573115 |
| 1                                   | 4.946396  | 10.533918 | 0.510647  | 1                                        | 5.006323  | 10.443699 | 0.567093  |
| 7                                   | 7.452233  | 12.569931 | -0.518398 | 7                                        | 7.372280  | 12.636545 | -0.430981 |
| 1                                   | 7.122431  | 11.501648 | 1.253255  | 1                                        | 7.187479  | 11.426196 | 1.261080  |
| 1                                   | 5.894861  | 12.731811 | 0.886752  | 1                                        | 5.902588  | 12.633944 | 1.064528  |
| 1                                   | 6.160515  | 13.959150 | -1.430621 | 1                                        | 5.991687  | 14.042160 | -1.152479 |
| 1                                   | 7.545747  | 13.434839 | -2.414022 | 1                                        | 7.333312  | 13.647148 | -2.247305 |
| 6                                   | 8.738329  | 12.947801 | -0.240673 | 6                                        | 8.655505  | 13.028643 | -0.200834 |
| 8                                   | 9.438824  | 13.596789 | -1.018977 | 8                                        | 9.287596  | 13.757254 | -0.959622 |
| 8                                   | 9.135396  | 12.505189 | 0.972133  | 8                                        | 9.139073  | 12.509510 | 0.938534  |
| 6                                   | 10.507289 | 12.724058 | 1.487511  | 6                                        | 10.522102 | 12.736216 | 1.378545  |
| 6                                   | 10.456407 | 12.034386 | 2.853839  | 6                                        | 10.586365 | 11.948260 | 2.681868  |
| 6                                   | 10.776297 | 14.223186 | 1.650790  | 6                                        | 10.754529 | 14.220659 | 1.639703  |
| 6                                   | 11.529212 | 12.037933 | 0.575935  | 6                                        | 11.498737 | 12.161821 | 0.357823  |
| 1                                   | 11.271746 | 10.981502 | 0.438388  | 1                                        | 11.263769 | 11.112144 | 0.154107  |
| 1                                   | 12.519249 | 12.087260 | 1.043466  | 1                                        | 12.513630 | 12.209340 | 0.764861  |
| 1                                   | 11.582592 | 12.520689 | -0.401836 | 1                                        | 11.472810 | 12.719862 | -0.578814 |
| 1                                   | 9.991323  | 14.689056 | 2.257454  | 1                                        | 9.998692  | 14.608911 | 2.329972  |
| 1                                   | 10.825595 | 14.729438 | 0.684858  | 1                                        | 10.721969 | 14.798848 | 0.715797  |
| 1                                   | 11.732403 | 14.363468 | 2.167936  | 1                                        | 11.737404 | 14.354812 | 2.102321  |
| 1                                   | 9.696035  | 12.494742 | 3.494032  | 1                                        | 9.856233  | 12.330705 | 3.401441  |
| 1                                   | 11.427891 | 12.125151 | 3.351139  | 1                                        | 11.584237 | 12.037318 | 3.120822  |
| 1                                   | 10.222594 | 10.969875 | 2.743855  | 1                                        | 10.379594 | 10.888630 | 2.504179  |
| 9                                   | 0.364519  | -0.372352 | -1.737569 | 9                                        | -0.033218 | -0.617684 | -1.723086 |
| 9                                   | -1.655887 | -0.989256 | -2.634426 | 9                                        | -2.032288 | -0.915231 | -2.779738 |
| 6                                   | -1.781977 | -0.347633 | 0.516405  | 6                                        | -2.184241 | -0.359118 | 0.404704  |
| 1                                   | -2.190151 | -1.190068 | -0.052263 | 1                                        | -2.640475 | -1.142475 | -0.211200 |
| 1                                   | -0.723165 | -0.563922 | 0.700317  | 1                                        | -1.159325 | -0.685277 | 0.619309  |
| 1                                   | -2.296204 | -0.292559 | 1.479269  | 1                                        | -2.731791 | -0.284189 | 1.346032  |
| 6                                   | 0.781690  | -1.141507 | -4.728052 | 6                                        | 0.604993  | -1.292715 | -4.615515 |
| 1                                   | 1.531022  | -1.281654 | -3.940617 | 1                                        | 1.279108  | -1.508071 | -3.777655 |
| 1                                   | -0.019413 | -1.865964 | -4.544596 | 1                                        | -0.273947 | -1.934102 | -4.484084 |
| 1                                   | 1.244314  | -1.368379 | -5.691947 | 1                                        | 1.105901  | -1.564314 | -5.546531 |
| Min T <sub>1</sub> (implicit water) |           |           |           | Products T <sub>1</sub> (implicit water) |           |           |           |
| 6                                   | -1.970151 | 0.875856  | -0.219058 | 6                                        | -1.730941 | 0.065024  | -0.725867 |
| 6                                   | -2.494678 | 2.078312  | 0.286860  | 6                                        | -2.081808 | 1.306839  | -0.128203 |
| 6                                   | -2.408651 | 3.057337  | -0.692045 | 6                                        | -2.375708 | 2.211016  | -1.121626 |
| 7                                   | -1.547988 | 1.096818  | -1.522510 | 7                                        | -1.792077 | 0.198972  | -2.086243 |

|   |           |           |           |   |           |           |           |
|---|-----------|-----------|-----------|---|-----------|-----------|-----------|
| 6 | -1.802696 | 2.409070  | -1.859537 | 6 | -2.191631 | 1.481234  | -2.380546 |
| 1 | -2.890152 | 2.207092  | 1.286798  | 1 | -2.102377 | 1.490538  | 0.937874  |
| 6 | -2.845515 | 4.480112  | -0.519683 | 6 | -2.755765 | 3.639283  | -0.909110 |
| 1 | -3.081740 | 4.664619  | 0.532821  | 1 | -2.679218 | 3.878624  | 0.155197  |
| 1 | -3.748325 | 4.712768  | -1.100042 | 1 | -3.792536 | 3.831877  | -1.214244 |
| 1 | -2.068936 | 5.192554  | -0.819353 | 1 | -2.101930 | 4.325896  | -1.466304 |
| 5 | -0.918151 | 0.040161  | -2.445161 | 5 | -1.506357 | -0.931868 | -3.113413 |
| 7 | -0.525135 | 0.752166  | -3.750105 | 7 | -1.498798 | -0.258486 | -4.516008 |
| 6 | -1.480009 | 2.918943  | -3.148238 | 6 | -2.351225 | 1.914212  | -3.752136 |
| 6 | -0.790363 | 2.069161  | -4.058116 | 6 | -1.895450 | 1.027737  | -4.800805 |
| 6 | -1.842464 | 4.315414  | -3.532241 | 6 | -2.943075 | 3.125194  | -4.052085 |
| 6 | 0.143091  | 0.165547  | -4.815936 | 6 | -1.130462 | -0.867644 | -5.682193 |
| 6 | -0.241743 | 2.332173  | -5.392443 | 6 | -1.745262 | 1.250443  | -6.241425 |
| 6 | 0.316439  | 1.135975  | -5.818484 | 6 | -1.274197 | 0.064587  | -6.749916 |
| 6 | -0.231799 | 3.608446  | -6.177102 | 6 | -2.001535 | 2.489339  | -7.038366 |
| 1 | 0.817248  | 0.965223  | -6.763339 | 1 | -1.037043 | -0.146908 | -7.784098 |
| 1 | -1.228256 | 3.873579  | -6.554956 | 1 | -3.071081 | 2.728765  | -7.086797 |
| 1 | 0.424152  | 3.497451  | -7.046066 | 1 | -1.650422 | 2.342813  | -8.062954 |
| 1 | 0.132201  | 4.456037  | -5.586127 | 1 | -1.480838 | 3.358959  | -6.621791 |
| 8 | -0.738625 | 5.219629  | -3.179008 | 8 | -0.537142 | 5.717409  | -2.449048 |
| 1 | -2.737600 | 4.663120  | -3.020761 | 1 | -3.303457 | 3.788295  | -3.281318 |
| 1 | -2.024112 | 4.413063  | -4.600633 | 1 | -3.095623 | 3.446746  | -5.070724 |
| 6 | -0.926077 | 6.538362  | -3.450743 | 6 | -0.690769 | 6.973452  | -2.529310 |
| 6 | 0.213926  | 7.369474  | -3.000291 | 6 | 0.539409  | 7.830164  | -2.236077 |
| 8 | -1.939103 | 6.948804  | -3.997751 | 8 | -1.767798 | 7.579717  | -2.784464 |
| 6 | 0.397815  | 8.743463  | -3.459581 | 6 | 0.966652  | 8.929447  | -3.082423 |
| 6 | 1.119661  | 6.817852  | -2.113773 | 6 | 1.262587  | 7.527076  | -1.111031 |
| 7 | 2.175907  | 7.467024  | -1.583773 | 7 | 2.336790  | 8.231424  | -0.650542 |
| 1 | 1.001827  | 5.794227  | -1.786159 | 1 | 0.986366  | 6.673985  | -0.503462 |
| 6 | 1.587281  | 9.415107  | -2.897352 | 6 | 2.158376  | 9.652814  | -2.598810 |
| 8 | -0.339746 | 9.330680  | -4.273250 | 8 | 0.422884  | 9.244784  | -4.166774 |
| 6 | 2.456649  | 8.784500  | -1.981882 | 6 | 2.826667  | 9.299903  | -1.402896 |
| 6 | 3.079854  | 6.758896  | -0.685163 | 6 | 3.032174  | 7.783638  | 0.545379  |
| 6 | 2.525766  | 5.830554  | 0.362143  | 6 | 2.242268  | 7.327885  | 1.743837  |
| 6 | 3.147098  | 7.142788  | 0.772370  | 6 | 3.003113  | 8.629416  | 1.795849  |
| 1 | 4.007745  | 6.468315  | -1.172347 | 1 | 3.955562  | 7.250717  | 0.326182  |
| 1 | 2.471943  | 7.922851  | 1.112721  | 1 | 2.419280  | 9.544970  | 1.762145  |
| 1 | 4.126098  | 7.145105  | 1.243000  | 1 | 3.916171  | 8.688865  | 2.381612  |
| 1 | 3.072612  | 4.908548  | 0.535182  | 1 | 2.625868  | 6.469301  | 2.287013  |
| 1 | 1.448106  | 5.741456  | 0.460929  | 1 | 1.158857  | 7.388422  | 1.701910  |
| 6 | 1.878539  | 10.737872 | -3.282900 | 6 | 2.664155  | 10.738606 | -3.343464 |
| 6 | 2.981364  | 11.379001 | -2.782461 | 6 | 3.773955  | 11.417744 | -2.916707 |
| 6 | 3.895049  | 10.766164 | -1.885130 | 6 | 4.491505  | 11.070162 | -1.741736 |
| 6 | 3.597141  | 9.452406  | -1.500706 | 6 | 3.986343  | 9.996683  | -1.002037 |
| 1 | 1.208552  | 11.251846 | -3.963490 | 1 | 2.150665  | 11.044893 | -4.248469 |
| 1 | 4.267294  | 8.935771  | -0.829781 | 1 | 4.503492  | 9.683703  | -0.106853 |
| 9 | 3.186974  | 12.681489 | -3.136234 | 9 | 4.188641  | 12.503547 | -3.638546 |
| 7 | 4.987841  | 11.480709 | -1.381756 | 7 | 5.606975  | 11.822786 | -1.342423 |
| 6 | 5.945120  | 12.033036 | -2.362528 | 6 | 6.736915  | 11.893761 | -2.290932 |
| 6 | 5.682581  | 10.932081 | -0.213322 | 6 | 6.084190  | 11.649057 | 0.031991  |
| 6 | 6.808069  | 13.117731 | -1.723645 | 6 | 7.674006  | 13.042675 | -1.928749 |
| 1 | 5.404814  | 12.460877 | -3.206019 | 1 | 6.360766  | 12.049152 | -3.301645 |
| 1 | 6.590230  | 11.222494 | -2.741419 | 1 | 7.294838  | 10.941845 | -2.273305 |
| 6 | 6.542987  | 12.009438 | 0.450445  | 6 | 7.013266  | 12.799853 | 0.424081  |
| 1 | 6.319380  | 10.074702 | -0.491575 | 1 | 6.618530  | 10.690759 | 0.154616  |
| 1 | 4.942414  | 10.589558 | 0.514744  | 1 | 5.227399  | 11.653677 | 0.711188  |
| 7 | 7.461486  | 12.606443 | -0.519825 | 7 | 8.109586  | 12.927790 | -0.537555 |
| 1 | 7.112937  | 11.564775 | 1.264031  | 1 | 7.420752  | 12.613333 | 1.415966  |
| 1 | 5.891162  | 12.791539 | 0.867844  | 1 | 6.439879  | 13.738588 | 0.453277  |

|                                     |           |           |           |                                     |           |           |           |
|-------------------------------------|-----------|-----------|-----------|-------------------------------------|-----------|-----------|-----------|
| 1                                   | 6.180948  | 13.984182 | -1.464375 | 1                                   | 7.155629  | 14.002410 | -2.075544 |
| 1                                   | 7.574553  | 13.443489 | -2.426862 | 1                                   | 8.552750  | 13.021958 | -2.573194 |
| 6                                   | 8.746288  | 12.984200 | -0.236364 | 6                                   | 9.394889  | 13.259139 | -0.203990 |
| 8                                   | 9.455947  | 13.619098 | -1.018015 | 8                                   | 10.270421 | 13.507688 | -1.034586 |
| 8                                   | 9.131106  | 12.558599 | 0.986478  | 8                                   | 9.576876  | 13.259670 | 1.134702  |
| 6                                   | 10.499374 | 12.779918 | 1.510288  | 6                                   | 10.896969 | 13.515074 | 1.756790  |
| 6                                   | 10.433965 | 12.111151 | 2.886354  | 6                                   | 10.583540 | 13.388409 | 3.250440  |
| 6                                   | 10.773049 | 14.280277 | 1.653341  | 6                                   | 11.372177 | 14.933143 | 1.425275  |
| 6                                   | 11.526159 | 12.076103 | 0.617849  | 6                                   | 11.900299 | 12.441447 | 1.324494  |
| 1                                   | 11.265421 | 11.018793 | 0.493875  | 1                                   | 11.501710 | 11.440735 | 1.526904  |
| 1                                   | 12.512440 | 12.128330 | 1.092934  | 1                                   | 12.825577 | 12.560314 | 1.899788  |
| 1                                   | 11.589792 | 12.543978 | -0.366526 | 1                                   | 12.139591 | 12.520123 | 0.262157  |
| 1                                   | 9.984778  | 14.758272 | 2.246136  | 1                                   | 10.603446 | 15.666924 | 1.693351  |
| 1                                   | 10.832640 | 14.771741 | 0.680379  | 1                                   | 11.609498 | 15.039348 | 0.365067  |
| 1                                   | 11.725229 | 14.424641 | 2.176593  | 1                                   | 12.272491 | 15.156901 | 2.008939  |
| 1                                   | 9.669791  | 12.583961 | 3.512806  | 1                                   | 9.833444  | 14.126619 | 3.554368  |
| 1                                   | 11.401392 | 12.205799 | 3.390787  | 1                                   | 11.493143 | 13.558913 | 3.835966  |
| 1                                   | 10.197007 | 11.045984 | 2.790373  | 1                                   | 10.203985 | 12.387921 | 3.484838  |
| 9                                   | 0.224435  | -0.532205 | -1.832477 | 9                                   | -0.259045 | -1.507107 | -2.855908 |
| 9                                   | -1.841207 | -1.006170 | -2.706639 | 9                                   | -2.509860 | -1.908610 | -3.051727 |
| 6                                   | -1.852031 | -0.438922 | 0.467385  | 6                                   | -1.346020 | -1.191874 | -0.039470 |
| 1                                   | -2.354167 | -1.232340 | -0.099526 | 1                                   | -1.869401 | -2.054970 | -0.463554 |
| 1                                   | -0.802269 | -0.740099 | 0.572558  | 1                                   | -0.270688 | -1.376820 | -0.163342 |
| 1                                   | -2.300042 | -0.380620 | 1.462514  | 1                                   | -1.565290 | -1.120444 | 1.027604  |
| 6                                   | 0.577357  | -1.257481 | -4.825776 | 6                                   | -0.652838 | -2.268596 | -5.766236 |
| 1                                   | 1.303654  | -1.457523 | -4.028214 | 1                                   | 0.357813  | -2.348690 | -5.343993 |
| 1                                   | -0.269515 | -1.934741 | -4.660412 | 1                                   | -1.293899 | -2.944473 | -5.191145 |
| 1                                   | 1.037831  | -1.499399 | -5.786971 | 1                                   | -0.620299 | -2.593061 | -6.808100 |
| Min S <sub>0</sub> (explicit water) |           |           |           | Min S <sub>1</sub> (explicit water) |           |           |           |
| 6                                   | -1.577312 | 0.872572  | -0.174316 | 6                                   | -1.494839 | 0.777540  | -0.253079 |
| 6                                   | -2.125918 | 2.044323  | 0.383440  | 6                                   | -1.941193 | 1.957863  | 0.378883  |
| 6                                   | -2.198233 | 3.019518  | -0.605948 | 6                                   | -2.009920 | 2.970965  | -0.559520 |
| 7                                   | -1.306156 | 1.095435  | -1.481066 | 7                                   | -1.284484 | 1.040634  | -1.565704 |
| 6                                   | -1.673510 | 2.413005  | -1.800569 | 6                                   | -1.592556 | 2.379886  | -1.811300 |
| 1                                   | -2.434266 | 2.156078  | 1.415423  | 1                                   | -2.180788 | 2.040282  | 1.431670  |
| 6                                   | -2.735793 | 4.402212  | -0.369741 | 6                                   | -2.434925 | 4.375406  | -0.270432 |
| 1                                   | -2.947606 | 4.531870  | 0.695744  | 1                                   | -2.504094 | 4.518750  | 0.811008  |
| 1                                   | -3.674455 | 4.579539  | -0.909796 | 1                                   | -3.421142 | 4.607585  | -0.690281 |
| 1                                   | -2.028744 | 5.184982  | -0.662744 | 1                                   | -1.727842 | 5.114865  | -0.658363 |
| 5                                   | -0.691657 | 0.075350  | -2.465327 | 5                                   | -0.813540 | 0.022498  | -2.610359 |
| 7                                   | -0.549407 | 0.774577  | -3.835733 | 7                                   | -0.639056 | 0.775947  | -3.934049 |
| 6                                   | -1.490185 | 2.899380  | -3.105647 | 6                                   | -1.465568 | 2.927347  | -3.112962 |
| 6                                   | -0.932348 | 2.096287  | -4.116926 | 6                                   | -0.940442 | 2.121590  | -4.154752 |
| 6                                   | -1.887884 | 4.317885  | -3.430667 | 6                                   | -1.859089 | 4.338699  | -3.380564 |
| 6                                   | -0.041785 | 0.219229  | -4.960790 | 6                                   | -0.169687 | 0.238501  | -5.086003 |
| 6                                   | -0.633961 | 2.349922  | -5.501474 | 6                                   | -0.615413 | 2.423452  | -5.531818 |
| 6                                   | -0.082017 | 1.172264  | -5.996915 | 6                                   | -0.148340 | 1.242229  | -6.077746 |
| 6                                   | -0.835088 | 3.584554  | -6.334373 | 6                                   | -0.719680 | 3.720862  | -6.269396 |
| 1                                   | 0.264453  | 1.004879  | -7.009054 | 1                                   | 0.190135  | 1.094991  | -7.095704 |
| 1                                   | -1.897728 | 3.805739  | -6.495328 | 1                                   | -1.759200 | 4.005906  | -6.471785 |
| 1                                   | -0.383938 | 3.434015  | -7.319636 | 1                                   | -0.217540 | 3.628819  | -7.235994 |
| 1                                   | -0.372466 | 4.474043  | -5.894012 | 1                                   | -0.247869 | 4.548905  | -5.730371 |
| 8                                   | -0.730838 | 5.167370  | -3.170095 | 8                                   | -0.715629 | 5.208348  | -3.098859 |
| 1                                   | -2.717036 | 4.658902  | -2.816071 | 1                                   | -2.685011 | 4.661600  | -2.750611 |
| 1                                   | -2.177810 | 4.426139  | -4.471842 | 1                                   | -2.150874 | 4.486121  | -4.415573 |
| 6                                   | -0.902074 | 6.502039  | -3.415625 | 6                                   | -0.872373 | 6.521316  | -3.388427 |
| 6                                   | 0.243825  | 7.312798  | -2.975300 | 6                                   | 0.257983  | 7.347817  | -2.944428 |
| 8                                   | -1.920515 | 6.929373  | -3.938190 | 8                                   | -1.869979 | 6.935581  | -3.951642 |

|   |           |           |           |   |           |           |           |
|---|-----------|-----------|-----------|---|-----------|-----------|-----------|
| 6 | 0.521110  | 8.617509  | -3.572195 | 6 | 0.551744  | 8.625784  | -3.573820 |
| 6 | 1.047305  | 6.833455  | -1.957254 | 6 | 1.028406  | 6.906537  | -1.894303 |
| 7 | 2.086639  | 7.502205  | -1.423625 | 7 | 2.050042  | 7.588468  | -1.358658 |
| 1 | 0.852792  | 5.867370  | -1.511874 | 1 | 0.824050  | 5.955312  | -1.422836 |
| 6 | 1.694955  | 9.303122  | -3.000496 | 6 | 1.711800  | 9.326329  | -2.999312 |
| 8 | -0.130606 | 9.121042  | -4.504671 | 8 | -0.071663 | 9.099943  | -4.531706 |
| 6 | 2.462038  | 8.750074  | -1.952582 | 6 | 2.443709  | 8.809344  | -1.921511 |
| 6 | 2.878598  | 6.879097  | -0.368580 | 6 | 2.803991  | 7.006936  | -0.262111 |
| 6 | 2.196122  | 6.114768  | 0.733870  | 6 | 2.075735  | 6.319815  | 0.853067  |
| 6 | 2.846625  | 7.443492  | 1.029933  | 6 | 2.743004  | 7.643150  | 1.096105  |
| 1 | 3.826301  | 6.492132  | -0.735488 | 1 | 3.751658  | 6.583359  | -0.582434 |
| 1 | 2.185483  | 8.286177  | 1.211212  | 1 | 2.096928  | 8.508083  | 1.208481  |
| 1 | 3.783465  | 7.468229  | 1.579100  | 1 | 3.661497  | 7.678164  | 1.672913  |
| 1 | 2.680925  | 5.201626  | 1.065614  | 1 | 2.529236  | 5.417858  | 1.249631  |
| 1 | 1.110878  | 6.080934  | 0.751194  | 1 | 0.990750  | 6.309001  | 0.834716  |
| 6 | 2.078760  | 10.557612 | -3.512050 | 6 | 2.110646  | 10.555261 | -3.546840 |
| 6 | 3.173627  | 11.206765 | -3.004743 | 6 | 3.192311  | 11.212573 | -3.038835 |
| 6 | 3.989889  | 10.665870 | -1.976185 | 6 | 3.975037  | 10.704428 | -1.976669 |
| 6 | 3.597101  | 9.421100  | -1.465516 | 6 | 3.567815  | 9.489518  | -1.431740 |
| 1 | 1.486770  | 11.015424 | -4.297034 | 1 | 1.540655  | 10.984973 | -4.362470 |
| 1 | 4.189766  | 8.959462  | -0.689859 | 1 | 4.137546  | 9.053966  | -0.625203 |
| 9 | 3.467757  | 12.448658 | -3.487559 | 9 | 3.512684  | 12.426669 | -3.554872 |
| 7 | 5.080446  | 11.384746 | -1.478559 | 7 | 5.060557  | 11.434247 | -1.489769 |
| 6 | 6.125449  | 11.790206 | -2.441762 | 6 | 6.125745  | 11.752981 | -2.451951 |
| 6 | 5.668564  | 10.945309 | -0.209499 | 6 | 5.616269  | 11.032602 | -0.201575 |
| 6 | 6.989712  | 12.906838 | -1.862837 | 6 | 7.015510  | 12.862818 | -1.916681 |
| 1 | 5.663485  | 12.140855 | -3.363590 | 1 | 5.688226  | 12.072659 | -3.395927 |
| 1 | 6.758329  | 10.919657 | -2.682411 | 1 | 6.732435  | 10.852755 | -2.639813 |
| 6 | 6.530965  | 12.056681 | 0.393027  | 6 | 6.501951  | 12.136963 | 0.361262  |
| 1 | 6.281438  | 10.037789 | -0.345462 | 1 | 6.203249  | 10.103862 | -0.292011 |
| 1 | 4.865816  | 10.716771 | 0.496467  | 1 | 4.799519  | 10.856470 | 0.501926  |
| 7 | 7.538153  | 12.507533 | -0.567890 | 7 | 7.529823  | 12.507096 | -0.602514 |
| 1 | 7.024315  | 11.683804 | 1.288611  | 1 | 6.972168  | 11.792217 | 1.279161  |
| 1 | 5.888757  | 12.904235 | 0.675724  | 1 | 5.885457  | 13.016101 | 0.594235  |
| 1 | 6.384862  | 13.818445 | -1.743013 | 1 | 6.439988  | 13.796574 | -1.847329 |
| 1 | 7.814895  | 13.125496 | -2.540547 | 1 | 7.856300  | 13.023474 | -2.589693 |
| 6 | 8.817379  | 12.864986 | -0.236757 | 6 | 8.814363  | 12.816404 | -0.275184 |
| 8 | 9.605399  | 13.381541 | -1.030355 | 8 | 9.630172  | 13.259832 | -1.077718 |
| 8 | 9.100473  | 12.563702 | 1.049139  | 8 | 9.074590  | 12.562456 | 1.016915  |
| 6 | 10.439794 | 12.789810 | 1.641331  | 6 | 10.407890 | 12.757568 | 1.601528  |
| 6 | 10.252783 | 12.281800 | 3.073854  | 6 | 10.199078 | 12.326982 | 3.048800  |
| 6 | 10.771391 | 14.285307 | 1.639985  | 6 | 10.801389 | 14.229430 | 1.533773  |
| 6 | 11.489964 | 11.951872 | 0.905604  | 6 | 11.420655 | 11.848124 | 0.913877  |
| 1 | 11.188743 | 10.898416 | 0.878051  | 1 | 11.074714 | 10.809610 | 0.932990  |
| 1 | 12.443659 | 12.017400 | 1.441719  | 1 | 12.372821 | 11.898123 | 1.451382  |
| 1 | 11.641180 | 12.304538 | -0.116549 | 1 | 11.588636 | 12.147487 | -0.121264 |
| 1 | 9.969338  | 14.855380 | 2.122642  | 1 | 10.022274 | 14.852875 | 1.984088  |
| 1 | 10.914962 | 14.663820 | 0.626206  | 1 | 10.964382 | 14.552822 | 0.505303  |
| 1 | 11.693811 | 14.450467 | 2.208419  | 1 | 11.726155 | 14.381074 | 2.099323  |
| 1 | 9.470587  | 12.850048 | 3.588850  | 1 | 9.440132  | 12.949724 | 3.531853  |
| 1 | 11.187613 | 12.396064 | 3.632759  | 1 | 11.135315 | 12.428449 | 3.605150  |
| 1 | 9.974951  | 11.222203 | 3.077967  | 1 | 9.877709  | 11.282329 | 3.099343  |
| 8 | 2.156616  | 4.029446  | -3.444461 | 8 | 1.984632  | 3.974771  | -2.740420 |
| 1 | 2.179994  | 3.105246  | -3.740033 | 1 | 2.039942  | 3.015088  | -2.860340 |
| 1 | 1.211317  | 4.261439  | -3.431966 | 1 | 1.067053  | 4.209261  | -2.961665 |
| 8 | -4.499641 | 6.544676  | -5.147497 | 8 | -4.253792 | 6.136222  | -5.248272 |
| 1 | -4.739799 | 7.420078  | -5.488940 | 1 | -4.519784 | 6.860254  | -5.833162 |
| 1 | -3.619641 | 6.663363  | -4.739141 | 1 | -3.437042 | 6.440692  | -4.807152 |
| 9 | 0.574778  | -0.349292 | -2.000120 | 9 | 0.407686  | -0.558137 | -2.212813 |



|                                     |           |           |           |                                    |           |           |           |
|-------------------------------------|-----------|-----------|-----------|------------------------------------|-----------|-----------|-----------|
| 9                                   | -1.529260 | -1.058874 | -2.580512 | 9                                  | -1.760764 | -1.013987 | -2.752747 |
| 6                                   | -1.315558 | -0.423382 | 0.521047  | 6                                  | -1.269140 | -0.553910 | 0.360023  |
| 1                                   | -1.844888 | -1.249840 | 0.034172  | 1                                  | -1.838717 | -1.332220 | -0.160742 |
| 1                                   | -0.248058 | -0.671142 | 0.508747  | 1                                  | -0.213003 | -0.842746 | 0.297325  |
| 1                                   | -1.646413 | -0.360262 | 1.560697  | 1                                  | -1.566965 | -0.539126 | 1.409954  |
| 6                                   | 0.469324  | -1.182255 | -5.040242 | 6                                  | 0.244993  | -1.179451 | -5.217102 |
| 1                                   | 1.309295  | -1.337936 | -4.353865 | 1                                  | 1.098514  | -1.402511 | -4.565613 |
| 1                                   | -0.308322 | -1.904825 | -4.768943 | 1                                  | -0.562764 | -1.857927 | -4.919347 |
| 1                                   | 0.806172  | -1.396819 | -6.057492 | 1                                  | 0.526034  | -1.394413 | -6.249623 |
| Min T <sub>1</sub> (explicit water) |           |           |           | TS T <sub>1</sub> (explicit water) |           |           |           |
| 6                                   | -1.584850 | 0.679536  | -0.276388 | 6                                  | -1.537996 | 0.597141  | -0.244902 |
| 6                                   | -2.062422 | 1.845161  | 0.348858  | 6                                  | -1.921365 | 1.796887  | 0.401517  |
| 6                                   | -2.109180 | 2.871525  | -0.581993 | 6                                  | -2.077204 | 2.784768  | -0.549340 |
| 7                                   | -1.325954 | 0.972675  | -1.608070 | 7                                  | -1.448500 | 0.838178  | -1.594916 |
| 6                                   | -1.632628 | 2.294413  | -1.843462 | 6                                  | -1.776505 | 2.152747  | -1.832239 |
| 1                                   | -2.341233 | 1.916231  | 1.392788  | 1                                  | -2.058294 | 1.904965  | 1.469678  |
| 6                                   | -2.566599 | 4.267723  | -0.289759 | 6                                  | -2.464519 | 4.200739  | -0.260661 |
| 1                                   | -2.701709 | 4.388935  | 0.789295  | 1                                  | -2.475429 | 4.363985  | 0.820530  |
| 1                                   | -3.529746 | 4.497031  | -0.764829 | 1                                  | -3.468287 | 4.434822  | -0.638454 |
| 1                                   | -1.846621 | 5.022712  | -0.623334 | 1                                  | -1.765974 | 4.915798  | -0.707759 |
| 5                                   | -0.804281 | -0.029431 | -2.652107 | 5                                  | -1.079739 | -0.216263 | -2.666808 |
| 7                                   | -0.620710 | 0.741347  | -3.970575 | 7                                  | -0.954886 | 0.538417  | -4.012588 |
| 6                                   | -1.467643 | 2.874618  | -3.134467 | 6                                  | -1.783451 | 2.690049  | -3.170272 |
| 6                                   | -0.928242 | 2.068459  | -4.178264 | 6                                  | -1.283829 | 1.855018  | -4.234640 |
| 6                                   | -1.853431 | 4.290660  | -3.389508 | 6                                  | -2.229798 | 3.989618  | -3.426282 |
| 6                                   | -0.123468 | 0.203512  | -5.148994 | 6                                  | -0.520414 | -0.013715 | -5.193813 |
| 6                                   | -0.593208 | 2.389061  | -5.570095 | 6                                  | -1.024020 | 2.158023  | -5.640871 |
| 6                                   | -0.106736 | 1.215377  | -6.125270 | 6                                  | -0.558127 | 0.984184  | -6.197289 |
| 6                                   | -0.709725 | 3.691933  | -6.301153 | 6                                  | -1.188564 | 3.451730  | -6.374259 |
| 1                                   | 0.240888  | 1.086155  | -7.142636 | 1                                  | -0.258613 | 0.834176  | -7.226426 |
| 1                                   | -1.754373 | 3.977278  | -6.482479 | 1                                  | -2.245664 | 3.722044  | -6.493332 |
| 1                                   | -0.224677 | 3.604946  | -7.278160 | 1                                  | -0.758081 | 3.361670  | -7.375490 |
| 1                                   | -0.229936 | 4.518224  | -5.764371 | 1                                  | -0.691136 | 4.280500  | -5.858944 |
| 8                                   | -0.704578 | 5.182154  | -3.086376 | 8                                  | -0.540547 | 5.243218  | -3.243617 |
| 1                                   | -2.682894 | 4.616542  | -2.766089 | 1                                  | -2.751899 | 4.549705  | -2.668861 |
| 1                                   | -2.130205 | 4.460972  | -4.425593 | 1                                  | -2.404566 | 4.320105  | -4.435794 |
| 6                                   | -0.875611 | 6.502436  | -3.362061 | 6                                  | -0.757958 | 6.517721  | -3.299239 |
| 6                                   | 0.258259  | 7.337517  | -2.920974 | 6                                  | 0.399088  | 7.385405  | -2.878634 |
| 8                                   | -1.883023 | 6.924069  | -3.915800 | 8                                  | -1.839575 | 7.043454  | -3.635506 |
| 6                                   | 0.569226  | 8.603510  | -3.580283 | 6                                  | 0.736478  | 8.623817  | -3.563909 |
| 6                                   | 1.015245  | 6.916437  | -1.845087 | 6                                  | 1.149421  | 6.973845  | -1.802622 |
| 7                                   | 2.040204  | 7.609390  | -1.310286 | 7                                  | 2.178092  | 7.672231  | -1.259314 |
| 1                                   | 0.795066  | 5.980692  | -1.349718 | 1                                  | 0.926931  | 6.035901  | -1.310031 |
| 6                                   | 1.734751  | 9.307472  | -3.013190 | 6                                  | 1.891986  | 9.340203  | -2.991027 |
| 8                                   | -0.046036 | 9.061347  | -4.560635 | 8                                  | 0.151205  | 9.055630  | -4.579178 |
| 6                                   | 2.456316  | 8.812326  | -1.905655 | 6                                  | 2.597291  | 8.864102  | -1.862808 |
| 6                                   | 2.773685  | 7.050836  | -0.180324 | 6                                  | 2.908583  | 7.116062  | -0.129302 |
| 6                                   | 2.026235  | 6.389202  | 0.946544  | 6                                  | 2.157761  | 6.457946  | 0.997755  |
| 6                                   | 2.698303  | 7.721426  | 1.168796  | 6                                  | 2.833399  | 7.788346  | 1.219841  |
| 1                                   | 3.725440  | 6.615432  | -0.475441 | 1                                  | 3.861215  | 6.677201  | -0.418190 |
| 1                                   | 2.052748  | 8.590721  | 1.256151  | 1                                  | 2.190886  | 8.660204  | 1.304678  |
| 1                                   | 3.611595  | 7.766815  | 1.755042  | 1                                  | 3.745204  | 7.830985  | 1.808805  |
| 1                                   | 2.472512  | 5.493547  | 1.367978  | 1                                  | 2.600267  | 5.562079  | 1.422930  |
| 1                                   | 0.940611  | 6.382122  | 0.917953  | 1                                  | 1.072308  | 6.453611  | 0.964976  |
| 6                                   | 2.159119  | 10.518713 | -3.592862 | 6                                  | 2.324322  | 10.543210 | -3.584283 |
| 6                                   | 3.250885  | 11.179696 | -3.094492 | 6                                  | 3.404537  | 11.216594 | -3.078896 |
| 6                                   | 4.024139  | 10.692946 | -2.007350 | 6                                  | 4.159900  | 10.750794 | -1.970326 |
| 6                                   | 3.589112  | 9.494116  | -1.426797 | 6                                  | 3.722160  | 9.560476  | -1.378446 |

|                                          |           |           |           |   |           |           |           |
|------------------------------------------|-----------|-----------|-----------|---|-----------|-----------|-----------|
| 1                                        | 1.601697  | 10.933556 | -4.425588 | 1 | 1.779756  | 10.941032 | -4.433779 |
| 1                                        | 4.147549  | 9.074146  | -0.603467 | 1 | 4.269451  | 9.156567  | -0.539492 |
| 9                                        | 3.586760  | 12.380483 | -3.649512 | 9 | 3.748133  | 12.410210 | -3.648668 |
| 7                                        | 5.117868  | 11.421296 | -1.528555 | 7 | 5.242846  | 11.496275 | -1.485574 |
| 6                                        | 6.199134  | 11.727123 | -2.488798 | 6 | 6.345266  | 11.767933 | -2.431028 |
| 6                                        | 5.660401  | 11.055842 | -0.216405 | 6 | 5.758730  | 11.160902 | -0.155373 |
| 6                                        | 7.082797  | 12.856257 | -1.966005 | 6 | 7.223926  | 12.907479 | -1.922735 |
| 1                                        | 5.771479  | 12.024865 | -3.445211 | 1 | 5.938699  | 12.040934 | -3.404133 |
| 1                                        | 6.810899  | 10.823805 | -2.650494 | 1 | 6.955793  | 10.857503 | -2.555366 |
| 6                                        | 6.541318  | 12.181684 | 0.330238  | 6 | 6.632169  | 12.297453 | 0.380618  |
| 1                                        | 6.249246  | 10.124193 | -0.272145 | 1 | 6.346482  | 10.226844 | -0.176478 |
| 1                                        | 4.833577  | 10.900053 | 0.481613  | 1 | 4.918056  | 11.023110 | 0.529935  |
| 7                                        | 7.585826  | 12.533106 | -0.632179 | 7 | 7.697404  | 12.621547 | -0.569302 |
| 1                                        | 6.999932  | 11.859467 | 1.263158  | 1 | 7.071409  | 11.997715 | 1.330266  |
| 1                                        | 5.919015  | 13.065740 | 0.534607  | 1 | 6.008793  | 13.188160 | 0.550322  |
| 1                                        | 6.503705  | 13.791249 | -1.926115 | 1 | 6.648934  | 13.845926 | -1.922630 |
| 1                                        | 7.931061  | 13.002639 | -2.634579 | 1 | 8.086936  | 13.030572 | -2.577021 |
| 6                                        | 8.872758  | 12.855996 | -0.296791 | 6 | 8.972016  | 12.969691 | -0.212399 |
| 8                                        | 9.699278  | 13.281737 | -1.105195 | 8 | 9.813705  | 13.380801 | -1.012759 |
| 8                                        | 9.115809  | 12.632713 | 1.013165  | 8 | 9.185398  | 12.787862 | 1.109162  |
| 6                                        | 10.453295 | 12.834336 | 1.618002  | 6 | 10.504032 | 13.027381 | 1.740819  |
| 6                                        | 10.215093 | 12.435470 | 3.077176  | 6 | 10.235199 | 12.667093 | 3.204724  |
| 6                                        | 10.858714 | 14.308447 | 1.522871  | 6 | 10.889626 | 14.504311 | 1.612610  |
| 6                                        | 11.473876 | 11.898046 | 0.963798  | 6 | 11.555114 | 12.088846 | 1.140288  |
| 1                                        | 11.121790 | 10.860825 | 1.002539  | 1 | 11.216764 | 11.047950 | 1.198113  |
| 1                                        | 12.420144 | 11.955220 | 1.513824  | 1 | 12.485048 | 12.175001 | 1.713874  |
| 1                                        | 11.659769 | 12.170969 | -0.076846 | 1 | 11.765725 | 12.336096 | 0.097998  |
| 1                                        | 10.077749 | 14.948307 | 1.949398  | 1 | 10.089147 | 15.143913 | 2.001716  |
| 1                                        | 11.038230 | 14.609407 | 0.489082  | 1 | 11.089524 | 14.778195 | 0.575000  |
| 1                                        | 11.778285 | 14.467100 | 2.097763  | 1 | 11.792623 | 14.693742 | 2.204215  |
| 1                                        | 9.452051  | 13.074112 | 3.535265  | 1 | 9.451483  | 13.306610 | 3.625106  |
| 1                                        | 11.143862 | 12.543752 | 3.647235  | 1 | 11.147666 | 12.806261 | 3.794087  |
| 1                                        | 9.886118  | 11.392959 | 3.147007  | 1 | 9.920185  | 11.622001 | 3.296830  |
| 8                                        | 2.052837  | 3.891893  | -2.871694 | 8 | 1.927464  | 3.893637  | -3.397791 |
| 1                                        | 2.018319  | 2.923500  | -2.822652 | 1 | 1.953129  | 3.473924  | -4.271322 |
| 1                                        | 1.125037  | 4.169534  | -2.981333 | 1 | 1.072396  | 4.380854  | -3.370918 |
| 8                                        | -4.485253 | 6.429596  | -4.995890 | 8 | -3.965957 | 6.346578  | -5.259670 |
| 1                                        | -4.771301 | 7.292402  | -5.333933 | 1 | -4.030564 | 7.071989  | -5.899636 |
| 1                                        | -3.591924 | 6.583244  | -4.627867 | 1 | -3.198769 | 6.577213  | -4.682710 |
| 9                                        | 0.428099  | -0.585562 | -2.229491 | 9 | 0.141980  | -0.828422 | -2.341776 |
| 9                                        | -1.727560 | -1.091925 | -2.823392 | 9 | -2.084676 | -1.199925 | -2.749809 |
| 6                                        | -1.367806 | -0.664754 | 0.322277  | 6 | -1.257249 | -0.723214 | 0.375766  |
| 1                                        | -1.938632 | -1.435188 | -0.210253 | 1 | -1.815898 | -1.523635 | -0.121906 |
| 1                                        | -0.312044 | -0.958366 | 0.268487  | 1 | -0.192573 | -0.974374 | 0.288233  |
| 1                                        | -1.676798 | -0.659852 | 1.370466  | 1 | -1.525258 | -0.703868 | 1.434325  |
| 6                                        | 0.306189  | -1.214315 | -5.283772 | 6 | -0.086972 | -1.428177 | -5.330653 |
| 1                                        | 1.139811  | -1.443168 | -4.608257 | 1 | 0.849908  | -1.601076 | -4.785918 |
| 1                                        | -0.507692 | -1.903735 | -5.028144 | 1 | -0.831021 | -2.114675 | -4.911855 |
| 1                                        | 0.623993  | -1.410974 | -6.310676 | 1 | 0.072302  | -1.670674 | -6.383590 |
| Products T <sub>1</sub> (explicit water) |           |           |           |   |           |           |           |
| 6                                        | -4.741481 | -2.002753 | -1.713004 |   |           |           |           |
| 6                                        | -4.591688 | -1.320346 | -0.471207 |   |           |           |           |
| 6                                        | -3.871577 | -0.169555 | -0.682975 |   |           |           |           |
| 7                                        | -4.102384 | -1.287198 | -2.686271 |   |           |           |           |
| 6                                        | -3.570241 | -0.153904 | -2.115669 |   |           |           |           |
| 1                                        | -4.982535 | -1.674295 | 0.473619  |   |           |           |           |
| 6                                        | -3.472931 | 0.810471  | 0.373472  |   |           |           |           |

|   |           |           |           |
|---|-----------|-----------|-----------|
| 1 | -3.713829 | 0.403590  | 1.358852  |
| 1 | -4.010025 | 1.761555  | 0.269084  |
| 1 | -2.399232 | 1.027140  | 0.347004  |
| 5 | -4.049504 | -1.662182 | -4.196637 |
| 7 | -3.020205 | -0.696128 | -4.849367 |
| 6 | -2.845947 | 0.808963  | -2.916416 |
| 6 | -2.479887 | 0.422828  | -4.262095 |
| 6 | -2.555363 | 2.068386  | -2.431371 |
| 6 | -2.514989 | -0.805403 | -6.116620 |
| 6 | -1.542583 | 1.038470  | -5.204462 |
| 6 | -1.596385 | 0.259257  | -6.336010 |
| 6 | -0.654781 | 2.220559  | -4.996922 |
| 1 | -1.030987 | 0.403205  | -7.247214 |
| 1 | -1.218252 | 3.158572  | -4.913431 |
| 1 | 0.035548  | 2.310988  | -5.839879 |
| 1 | -0.063231 | 2.117767  | -4.079037 |
| 8 | 1.152807  | 5.350546  | -2.296964 |
| 1 | -2.848772 | 2.363819  | -1.434776 |
| 1 | -2.092624 | 2.837165  | -3.035702 |
| 6 | 0.903443  | 6.534809  | -2.680928 |
| 6 | 1.951911  | 7.595001  | -2.400993 |
| 8 | -0.168842 | 6.905681  | -3.239323 |
| 6 | 2.376139  | 8.574383  | -3.385960 |
| 6 | 2.514999  | 7.604829  | -1.149581 |
| 7 | 3.416113  | 8.522370  | -0.702628 |
| 1 | 2.238634  | 6.850238  | -0.423475 |
| 6 | 3.389852  | 9.530627  | -2.901965 |
| 8 | 1.973038  | 8.610745  | -4.570418 |
| 6 | 3.897825  | 9.494914  | -1.582775 |
| 6 | 3.959304  | 8.401416  | 0.641447  |
| 6 | 3.045440  | 8.066826  | 1.790554  |
| 6 | 3.640990  | 9.448533  | 1.681225  |
| 1 | 4.958072  | 7.969679  | 0.657472  |
| 1 | 2.972603  | 10.252971 | 1.387323  |
| 1 | 4.438823  | 9.739234  | 2.358856  |
| 1 | 3.431117  | 7.382474  | 2.540342  |
| 1 | 1.982037  | 7.968510  | 1.593766  |
| 6 | 3.883341  | 10.521273 | -3.775348 |
| 6 | 4.832556  | 11.411989 | -3.350044 |
| 6 | 5.391888  | 11.384766 | -2.045084 |
| 6 | 4.896621  | 10.404696 | -1.178848 |
| 1 | 3.486775  | 10.583066 | -4.783044 |
| 1 | 5.298632  | 10.333409 | -0.178941 |
| 9 | 5.233692  | 12.394182 | -4.212950 |
| 7 | 6.344085  | 12.340198 | -1.660062 |
| 6 | 7.591274  | 12.394454 | -2.450134 |
| 6 | 6.620315  | 12.482172 | -0.227788 |
| 6 | 8.331884  | 13.705331 | -2.200108 |
| 1 | 7.359052  | 12.315864 | -3.511681 |
| 1 | 8.239688  | 11.545161 | -2.175012 |
| 6 | 7.350318  | 13.798452 | 0.047965  |
| 1 | 7.228267  | 11.641624 | 0.149842  |
| 1 | 5.673673  | 12.494488 | 0.319231  |
| 7 | 8.560684  | 13.897233 | -0.768887 |
| 1 | 7.618364  | 13.848837 | 1.101630  |
| 1 | 6.682665  | 14.642013 | -0.183094 |
| 1 | 7.740192  | 14.545088 | -2.595033 |
| 1 | 9.295168  | 13.690707 | -2.709897 |
| 6 | 9.741533  | 14.439535 | -0.339894 |

|   |           |           |           |
|---|-----------|-----------|-----------|
| 8 | 10.704253 | 14.645019 | -1.080926 |
| 8 | 9.717277  | 14.698142 | 0.985914  |
| 6 | 10.893994 | 15.228308 | 1.713325  |
| 6 | 10.372803 | 15.325095 | 3.150070  |
| 6 | 11.262476 | 16.616360 | 1.180369  |
| 6 | 12.057849 | 14.236062 | 1.628514  |
| 1 | 11.739725 | 13.242823 | 1.965477  |
| 1 | 12.867760 | 14.573318 | 2.285431  |
| 1 | 12.445706 | 14.158265 | 0.610918  |
| 1 | 10.389641 | 17.278869 | 1.202672  |
| 1 | 11.643293 | 16.565924 | 0.158567  |
| 1 | 12.036813 | 17.054273 | 1.820631  |
| 1 | 9.511544  | 15.999648 | 3.206555  |
| 1 | 11.159882 | 15.714213 | 3.804612  |
| 1 | 10.069919 | 14.340021 | 3.521330  |
| 8 | 3.570527  | 4.197608  | -1.751056 |
| 1 | 3.599291  | 3.436320  | -2.350577 |
| 1 | 2.712292  | 4.656457  | -1.953415 |
| 8 | -2.103140 | 5.063219  | -3.768697 |
| 1 | -2.768985 | 5.571239  | -4.257687 |
| 1 | -1.372418 | 5.712690  | -3.564207 |
| 9 | -3.618652 | -2.983396 | -4.341755 |
| 9 | -5.312619 | -1.498790 | -4.781072 |
| 6 | -5.451946 | -3.280596 | -1.959366 |
| 1 | -6.093739 | -3.217038 | -2.844074 |
| 1 | -4.728781 | -4.085741 | -2.145509 |
| 1 | -6.054285 | -3.549401 | -1.089454 |
| 6 | -2.888305 | -1.885723 | -7.061150 |
| 1 | -2.448004 | -2.838989 | -6.740083 |
| 1 | -3.973307 | -2.030105 | -7.093258 |
| 1 | -2.521584 | -1.652997 | -8.062703 |

| Compound 4                          |           |           |           |                                     |           |           |           |
|-------------------------------------|-----------|-----------|-----------|-------------------------------------|-----------|-----------|-----------|
| Min S <sub>0</sub> (implicit water) |           |           |           | Min S <sub>1</sub> (implicit water) |           |           |           |
| 6                                   | -1.795776 | -4.258962 | 3.928837  | 6                                   | -1.684993 | -4.295499 | 3.827375  |
| 6                                   | -2.453537 | -3.092802 | 4.406820  | 6                                   | -2.295195 | -3.128451 | 4.355116  |
| 6                                   | -2.540460 | -1.952551 | 3.621726  | 6                                   | -2.377956 | -1.974991 | 3.606157  |
| 6                                   | -1.238820 | -4.195100 | 2.618511  | 6                                   | -1.170794 | -4.216218 | 2.504412  |
| 6                                   | -1.336651 | -3.046936 | 1.850750  | 6                                   | -1.262728 | -3.055173 | 1.771601  |
| 6                                   | -1.989880 | -1.882814 | 2.321485  | 6                                   | -1.869014 | -1.886306 | 2.290337  |
| 1                                   | -2.897105 | -3.079652 | 5.395247  | 1                                   | -2.704044 | -3.131069 | 5.357412  |
| 1                                   | -3.052041 | -1.080738 | 4.024805  | 1                                   | -2.852085 | -1.100291 | 4.044318  |
| 1                                   | -0.893035 | -3.057388 | 0.858995  | 1                                   | -0.853285 | -3.052208 | 0.766498  |
| 6                                   | -2.119006 | -0.657237 | 1.559580  | 6                                   | -1.988773 | -0.654427 | 1.569816  |
| 7                                   | -1.700213 | -5.394528 | 4.691573  | 7                                   | -1.594853 | -5.442614 | 4.554837  |
| 1                                   | -0.726535 | -5.054232 | 2.201873  | 1                                   | -0.696349 | -5.078482 | 2.053490  |
| 6                                   | -2.286943 | -5.433511 | 6.026181  | 6                                   | -2.136977 | -5.499108 | 5.902139  |
| 6                                   | -1.019026 | -6.575920 | 4.173779  | 6                                   | -0.962488 | -6.623290 | 3.990016  |
| 1                                   | 0.032901  | -6.365011 | 3.939458  | 1                                   | 0.083795  | -6.430478 | 3.725354  |
| 1                                   | -1.505035 | -6.957760 | 3.265852  | 1                                   | -1.488453 | -6.971358 | 3.093028  |
| 1                                   | -1.046431 | -7.361644 | 4.928867  | 1                                   | -0.982870 | -7.424149 | 4.727372  |
| 1                                   | -3.371544 | -5.263012 | 5.995201  | 1                                   | -3.215179 | -5.299792 | 5.909564  |
| 1                                   | -1.838221 | -4.679189 | 6.686490  | 1                                   | -1.646333 | -4.774855 | 6.563279  |
| 1                                   | -2.110516 | -6.415922 | 6.464423  | 1                                   | -1.973699 | -6.495399 | 6.309847  |
| 6                                   | -1.651991 | -0.411043 | 0.300745  | 6                                   | -1.546602 | -0.401327 | 0.293668  |
| 1                                   | -2.653121 | 0.140640  | 2.074703  | 1                                   | -2.484592 | 0.149939  | 2.110122  |
| 6                                   | -1.822959 | 0.839971  | -0.384428 | 6                                   | -1.692296 | 0.838486  | -0.366242 |

|   |           |           |           |   |           |           |           |
|---|-----------|-----------|-----------|---|-----------|-----------|-----------|
| 1 | -1.116904 | -1.186120 | -0.236268 | 1 | -1.050821 | -1.188482 | -0.262471 |
| 6 | -2.467332 | 2.023014  | 0.064957  | 6 | -2.281874 | 2.043862  | 0.099940  |
| 6 | -2.399093 | 2.979884  | -0.933242 | 6 | -2.209604 | 2.994889  | -0.889412 |
| 7 | -1.354264 | 1.070636  | -1.649868 | 7 | -1.250785 | 1.068595  | -1.653667 |
| 6 | -1.689969 | 2.373307  | -2.031837 | 6 | -1.553263 | 2.366406  | -2.014215 |
| 1 | -2.930726 | 2.158809  | 1.033434  | 1 | -2.711048 | 2.192129  | 1.082339  |
| 6 | -2.967107 | 4.364867  | -0.794325 | 6 | -2.711421 | 4.400064  | -0.746892 |
| 1 | -3.311868 | 4.515258  | 0.233436  | 1 | -2.982250 | 4.584869  | 0.296245  |
| 1 | -3.830157 | 4.528896  | -1.451858 | 1 | -3.606718 | 4.588222  | -1.350583 |
| 1 | -2.229101 | 5.143425  | -1.013787 | 1 | -1.957997 | 5.141115  | -1.030491 |
| 5 | -0.582519 | 0.064653  | -2.525402 | 5 | -0.539569 | 0.049922  | -2.541074 |
| 7 | -0.214871 | 0.763803  | -3.848302 | 7 | -0.172848 | 0.741193  | -3.851994 |
| 6 | -1.315806 | 2.865537  | -3.296353 | 6 | -1.211904 | 2.865562  | -3.290106 |
| 6 | -0.567844 | 2.073589  | -4.187768 | 6 | -0.485185 | 2.045136  | -4.180317 |
| 6 | -1.725630 | 4.257411  | -3.703248 | 6 | -1.614405 | 4.244624  | -3.693552 |
| 6 | 0.504727  | 0.213435  | -4.874782 | 6 | 0.528909  | 0.164944  | -4.891740 |
| 6 | -0.023510 | 2.346405  | -5.494223 | 6 | 0.062789  | 2.313096  | -5.491357 |
| 6 | 0.630089  | 1.193525  | -5.894834 | 6 | 0.673748  | 1.152763  | -5.902263 |
| 6 | -0.079995 | 3.598753  | -6.323985 | 6 | 0.036622  | 3.581131  | -6.290201 |
| 6 | 1.006849  | -1.132224 | -4.847697 | 6 | 0.980143  | -1.172877 | -4.874393 |
| 1 | 1.157370  | 1.064807  | -6.831098 | 1 | 1.192675  | 1.016296  | -6.842163 |
| 1 | -1.090305 | 3.803518  | -6.700235 | 1 | -0.959979 | 3.805138  | -6.687679 |
| 1 | 0.571994  | 3.487046  | -7.195906 | 1 | 0.710118  | 3.484787  | -7.146262 |
| 1 | 0.254205  | 4.482368  | -5.770451 | 1 | 0.363347  | 4.446775  | -5.706138 |
| 6 | 1.712681  | -1.701042 | -5.868226 | 6 | 1.663651  | -1.772246 | -5.904749 |
| 1 | 0.796429  | -1.707385 | -3.953070 | 1 | 0.758634  | -1.744959 | -3.980866 |
| 6 | 2.248786  | -3.046009 | -5.922804 | 6 | 2.142279  | -3.121438 | -5.944880 |
| 1 | 1.909226  | -1.099687 | -6.755317 | 1 | 1.873297  | -1.181048 | -6.794295 |
| 6 | 2.109102  | -3.999879 | -4.886456 | 6 | 1.976564  | -4.054916 | -4.894173 |
| 6 | 2.959884  | -3.463904 | -7.070950 | 6 | 2.826678  | -3.583489 | -7.092182 |
| 6 | 2.638927  | -5.275226 | -4.986249 | 6 | 2.453495  | -5.342748 | -4.980368 |
| 6 | 3.356031  | -5.690098 | -6.145943 | 6 | 3.140626  | -5.798337 | -6.138510 |
| 6 | 3.498400  | -4.736653 | -7.190849 | 6 | 3.311142  | -4.869045 | -7.196971 |
| 1 | 1.571774  | -3.740374 | -3.978464 | 1 | 1.459533  | -3.761465 | -3.986153 |
| 1 | 2.497783  | -5.960612 | -4.158953 | 1 | 2.296112  | -6.011684 | -4.143887 |
| 7 | 3.883641  | -6.951855 | -6.246365 | 7 | 3.613942  | -7.071705 | -6.226010 |
| 1 | 3.090903  | -2.763627 | -7.893515 | 1 | 2.975951  | -2.899345 | -7.923694 |
| 1 | 4.031511  | -4.993144 | -8.098634 | 1 | 3.826011  | -5.161129 | -8.103341 |
| 6 | 3.708938  | -7.912812 | -5.162912 | 6 | 3.421926  | -8.004225 | -5.127663 |
| 6 | 4.604264  | -7.352251 | -7.449386 | 6 | 4.309612  | -7.513036 | -7.423307 |
| 1 | 5.482516  | -6.716221 | -7.622792 | 1 | 5.211474  | -6.916833 | -7.605894 |
| 1 | 3.962739  | -7.304412 | -8.339822 | 1 | 3.666082  | -7.447676 | -8.308728 |
| 1 | 4.948114  | -8.380186 | -7.333336 | 1 | 4.609749  | -8.552116 | -7.297889 |
| 1 | 2.647343  | -8.124879 | -4.977177 | 1 | 2.357698  | -8.172028 | -4.923839 |
| 1 | 4.157604  | -7.552223 | -4.227785 | 1 | 3.898640  | -7.645106 | -4.207999 |
| 1 | 4.198911  | -8.847844 | -5.434703 | 1 | 3.871372  | -8.960298 | -5.390942 |
| 8 | -0.675485 | 5.172938  | -3.289331 | 8 | -0.567534 | 5.177876  | -3.307522 |
| 1 | -2.660043 | 4.557158  | -3.234670 | 1 | -2.539403 | 4.556413  | -3.214938 |
| 1 | -1.861458 | 4.340595  | -4.779024 | 1 | -1.763634 | 4.328439  | -4.766798 |
| 6 | -0.883548 | 6.492300  | -3.568173 | 6 | -0.784707 | 6.477083  | -3.601099 |
| 6 | 0.222358  | 7.344477  | -3.081815 | 6 | 0.302912  | 7.349710  | -3.115957 |
| 8 | -1.886537 | 6.871187  | -4.152364 | 8 | -1.782134 | 6.842611  | -4.194394 |
| 6 | 0.290927  | 8.771144  | -3.390075 | 6 | 0.409016  | 8.743256  | -3.516745 |
| 6 | 1.214762  | 6.764097  | -2.312123 | 6 | 1.233026  | 6.817322  | -2.254115 |
| 7 | 2.265227  | 7.420536  | -1.782442 | 7 | 2.253558  | 7.495714  | -1.708034 |
| 1 | 1.179061  | 5.707037  | -2.088773 | 1 | 1.165829  | 5.778212  | -1.963215 |
| 6 | 1.478970  | 9.453543  | -2.837181 | 6 | 1.567227  | 9.450549  | -2.941271 |
| 8 | -0.542253 | 9.398362  | -4.069607 | 8 | -0.365501 | 9.324788  | -4.288098 |
| 6 | 2.446237  | 8.786856  | -2.056074 | 6 | 2.467380  | 8.832763  | -2.062844 |

|                                     |           |           |           |                                    |           |           |           |
|-------------------------------------|-----------|-----------|-----------|------------------------------------|-----------|-----------|-----------|
| 6                                   | 3.264981  | 6.682139  | -1.019282 | 6                                  | 3.189635  | 6.808233  | -0.836917 |
| 6                                   | 2.832238  | 5.623267  | -0.041075 | 6                                  | 2.674177  | 5.847678  | 0.191604  |
| 6                                   | 3.408362  | 6.923328  | 0.463091  | 6                                  | 3.246990  | 7.168441  | 0.619384  |
| 1                                   | 4.172082  | 6.497917  | -1.590229 | 1                                  | 4.123432  | 6.561272  | -1.334216 |
| 1                                   | 2.716490  | 7.624068  | 0.921786  | 1                                  | 2.546664  | 7.919510  | 0.971015  |
| 1                                   | 4.414902  | 6.937933  | 0.871211  | 1                                  | 4.225059  | 7.197262  | 1.088627  |
| 1                                   | 3.437814  | 4.723089  | 0.002933  | 1                                  | 3.252949  | 4.944176  | 0.350364  |
| 1                                   | 1.769876  | 5.460141  | 0.113553  | 1                                  | 1.601129  | 5.719100  | 0.287652  |
| 6                                   | 1.667186  | 10.825042 | -3.094358 | 6                                  | 1.786493  | 10.794126 | -3.281851 |
| 6                                   | 2.767750  | 11.477560 | -2.603730 | 6                                  | 2.858173  | 11.465128 | -2.770547 |
| 6                                   | 3.779557  | 10.831811 | -1.845335 | 6                                  | 3.804145  | 10.864873 | -1.908497 |
| 6                                   | 3.582322  | 9.469113  | -1.585447 | 6                                  | 3.577285  | 9.534204  | -1.568769 |
| 1                                   | 0.920859  | 11.364954 | -3.666793 | 1                                  | 1.085607  | 11.297277 | -3.937835 |
| 1                                   | 4.328136  | 8.926960  | -1.023264 | 1                                  | 4.276932  | 9.027022  | -0.922100 |
| 9                                   | 2.873236  | 12.820551 | -2.825033 | 9                                  | 3.004632  | 12.780263 | -3.076269 |
| 7                                   | 4.867981  | 11.555345 | -1.346979 | 7                                  | 4.867940  | 11.613361 | -1.399652 |
| 6                                   | 5.711392  | 12.272735 | -2.325358 | 6                                  | 5.782199  | 12.210959 | -2.383568 |
| 6                                   | 5.682422  | 10.932722 | -0.299132 | 6                                  | 5.602493  | 11.053810 | -0.269890 |
| 6                                   | 6.554340  | 13.339160 | -1.631614 | 6                                  | 6.623412  | 13.300608 | -1.739236 |
| 1                                   | 5.082925  | 12.749858 | -3.076114 | 1                                  | 5.211615  | 12.641766 | -3.204333 |
| 1                                   | 6.372924  | 11.552960 | -2.836101 | 1                                  | 6.442269  | 11.430162 | -2.794364 |
| 6                                   | 6.527438  | 11.988565 | 0.417686  | 6                                  | 6.441780  | 12.132923 | 0.402257  |
| 1                                   | 6.344205  | 10.153796 | -0.715385 | 1                                  | 6.258250  | 10.227069 | -0.589247 |
| 1                                   | 5.022385  | 10.466608 | 0.437182  | 1                                  | 4.891709  | 10.665479 | 0.462991  |
| 7                                   | 7.329565  | 12.747036 | -0.542783 | 7                                  | 7.314458  | 12.778882 | -0.569334 |
| 1                                   | 7.184895  | 11.499181 | 1.133762  | 1                                  | 7.043865  | 11.686632 | 1.190165  |
| 1                                   | 5.864976  | 12.675637 | 0.965168  | 1                                  | 5.777872  | 12.883369 | 0.853244  |
| 1                                   | 5.898248  | 14.127332 | -1.232258 | 1                                  | 5.977426  | 14.138978 | -1.442990 |
| 1                                   | 7.242486  | 13.790539 | -2.346193 | 1                                  | 7.364005  | 13.667874 | -2.448039 |
| 6                                   | 8.611555  | 13.170253 | -0.317807 | 6                                  | 8.592651  | 13.170038 | -0.312197 |
| 8                                   | 9.219943  | 13.927315 | -1.075823 | 8                                  | 9.266136  | 13.838764 | -1.090340 |
| 8                                   | 9.117699  | 12.641798 | 0.817662  | 8                                  | 9.021007  | 12.722536 | 0.878579  |
| 6                                   | 10.512874 | 12.885500 | 1.253090  | 6                                  | 10.387662 | 12.960891 | 1.361237  |
| 6                                   | 10.596617 | 12.074202 | 2.549212  | 6                                  | 10.385905 | 12.259543 | 2.714674  |
| 6                                   | 10.725035 | 14.375769 | 1.536805  | 6                                  | 10.631034 | 14.456422 | 1.534347  |
| 6                                   | 11.493447 | 12.338607 | 0.211162  | 6                                  | 11.397415 | 12.308816 | 0.422782  |
| 1                                   | 11.274044 | 11.287122 | -0.006807 | 1                                  | 11.156074 | 11.250745 | 0.278741  |
| 1                                   | 12.512491 | 12.396411 | 0.610371  | 1                                  | 12.395212 | 12.371497 | 0.868236  |
| 1                                   | 11.451906 | 12.909870 | -0.718351 | 1                                  | 11.418110 | 12.804033 | -0.548595 |
| 1                                   | 9.970366  | 14.742450 | 2.241981  | 1                                  | 9.851342  | 14.899023 | 2.162592  |
| 1                                   | 10.674044 | 14.969442 | 0.622156  | 1                                  | 10.648360 | 14.972267 | 0.573806  |
| 1                                   | 11.711935 | 14.518709 | 1.991671  | 1                                  | 11.594336 | 14.609007 | 2.031174  |
| 1                                   | 9.865211  | 12.434023 | 3.281013  | 1                                  | 9.633148  | 12.697871 | 3.376760  |
| 1                                   | 11.597048 | 12.172152 | 2.983810  | 1                                  | 11.366287 | 12.363926 | 3.188278  |
| 1                                   | 10.405485 | 11.012810 | 2.357194  | 1                                  | 10.169771 | 11.193370 | 2.597570  |
| 9                                   | 0.593943  | -0.365949 | -1.855750 | 9                                  | 0.627451  | -0.439041 | -1.896314 |
| 9                                   | -1.380050 | -1.083477 | -2.778121 | 9                                  | -1.373594 | -1.073875 | -2.782113 |
| Min T <sub>1</sub> (implicit water) |           |           |           | TS T <sub>1</sub> (implicit water) |           |           |           |
| 6                                   | -1.796701 | -4.347280 | 3.837959  | 6                                  | -1.234142 | -4.286660 | 3.926734  |
| 6                                   | -2.440841 | -3.187587 | 4.355528  | 6                                  | -1.751383 | -3.075979 | 4.475127  |
| 6                                   | -2.525553 | -2.027377 | 3.606304  | 6                                  | -1.889135 | -1.946791 | 3.692203  |
| 6                                   | -1.250709 | -4.251849 | 2.523571  | 6                                  | -0.871877 | -4.273342 | 2.544430  |
| 6                                   | -1.344800 | -3.084632 | 1.789131  | 6                                  | -1.015815 | -3.135761 | 1.778008  |
| 6                                   | -1.985335 | -1.923047 | 2.297826  | 6                                  | -1.529059 | -1.924371 | 2.317959  |
| 1                                   | -2.874388 | -3.199565 | 5.348351  | 1                                  | -2.043392 | -3.028151 | 5.517037  |
| 1                                   | -3.025370 | -1.162658 | 4.037782  | 1                                  | -2.287235 | -1.041295 | 4.144572  |
| 1                                   | -0.910151 | -3.072504 | 0.793852  | 1                                  | -0.724279 | -3.183794 | 0.733184  |
| 6                                   | -2.110640 | -0.685229 | 1.578080  | 6                                  | -1.696244 | -0.714221 | 1.569126  |

|   |           |           |           |   |           |           |           |
|---|-----------|-----------|-----------|---|-----------|-----------|-----------|
| 7 | -1.704619 | -5.502339 | 4.567268  | 7 | -1.090614 | -5.409761 | 4.686863  |
| 1 | -0.749972 | -5.103834 | 2.079333  | 1 | -0.475401 | -5.166687 | 2.077566  |
| 6 | -2.279535 | -5.575198 | 5.906925  | 6 | -1.466499 | -5.399564 | 6.099423  |
| 6 | -1.035700 | -6.675528 | 4.012931  | 6 | -0.559781 | -6.640017 | 4.101919  |
| 1 | 0.014715  | -6.463592 | 3.775042  | 1 | 0.457089  | -6.492413 | 3.717717  |
| 1 | -1.533671 | -7.028902 | 3.100546  | 1 | -1.195120 | -6.998614 | 3.282657  |
| 1 | -1.061792 | -7.479720 | 4.747987  | 1 | -0.525670 | -7.411701 | 4.870168  |
| 1 | -3.361857 | -5.392344 | 5.889429  | 1 | -2.532580 | -5.173767 | 6.226504  |
| 1 | -1.815532 | -4.845556 | 6.583444  | 1 | -0.882689 | -4.659930 | 6.661188  |
| 1 | -2.109625 | -6.572066 | 6.313260  | 1 | -1.272417 | -6.383190 | 6.525661  |
| 6 | -1.644184 | -0.417034 | 0.303261  | 6 | -1.391349 | -0.515813 | 0.236129  |
| 1 | -2.630247 | 0.109079  | 2.111952  | 1 | -2.105687 | 0.123794  | 2.130706  |
| 6 | -1.792006 | 0.820558  | -0.359277 | 6 | -1.580272 | 0.708548  | -0.444874 |
| 1 | -1.126183 | -1.198271 | -0.242201 | 1 | -0.979462 | -1.335784 | -0.341061 |
| 6 | -2.407936 | 2.021414  | 0.092914  | 6 | -2.095954 | 1.943392  | 0.037737  |
| 6 | -2.325197 | 2.978326  | -0.895493 | 6 | -2.107545 | 2.861561  | -0.993336 |
| 7 | -1.320205 | 1.063016  | -1.652770 | 7 | -1.269089 | 0.889969  | -1.789349 |
| 6 | -1.629817 | 2.355740  | -2.014839 | 6 | -1.581741 | 2.174762  | -2.153114 |
| 1 | -2.862279 | 2.162631  | 1.065465  | 1 | -2.421293 | 2.133853  | 1.052202  |
| 6 | -2.855219 | 4.377750  | -0.759200 | 6 | -2.575741 | 4.281388  | -0.854100 |
| 1 | -3.171588 | 4.547472  | 0.275081  | 1 | -2.787194 | 4.494382  | 0.198401  |
| 1 | -3.729224 | 4.560085  | -1.397775 | 1 | -3.499320 | 4.470850  | -1.416335 |
| 1 | -2.102959 | 5.135328  | -1.004911 | 1 | -1.824671 | 5.000099  | -1.199341 |
| 5 | -0.576321 | 0.049856  | -2.531253 | 5 | -0.671163 | -0.186858 | -2.714434 |
| 7 | -0.196110 | 0.751017  | -3.840945 | 7 | -0.403604 | 0.459922  | -4.086365 |
| 6 | -1.268061 | 2.869323  | -3.288618 | 6 | -1.371604 | 2.634969  | -3.506239 |
| 6 | -0.515984 | 2.049515  | -4.171553 | 6 | -0.711505 | 1.749274  | -4.437231 |
| 6 | -1.665997 | 4.251531  | -3.690604 | 6 | -1.771897 | 3.913343  | -3.898499 |
| 6 | 0.534621  | 0.175752  | -4.884879 | 6 | 0.204295  | -0.173172 | -5.166690 |
| 6 | 0.048982  | 2.327663  | -5.485861 | 6 | -0.269798 | 1.969809  | -5.797173 |
| 6 | 0.679016  | 1.171138  | -5.892067 | 6 | 0.285625  | 0.778821  | -6.220729 |
| 6 | 0.016355  | 3.596455  | -6.290211 | 6 | -0.344609 | 3.213004  | -6.636077 |
| 6 | 1.001103  | -1.156248 | -4.864676 | 6 | 0.625332  | -1.522325 | -5.136998 |
| 1 | 1.209603  | 1.041969  | -6.826966 | 1 | 0.720048  | 0.600222  | -7.195747 |
| 1 | -0.983906 | 3.818726  | -6.683920 | 1 | -1.375640 | 3.458852  | -6.922192 |
| 1 | 0.686269  | 3.498633  | -7.150636 | 1 | 0.221477  | 3.063707  | -7.560848 |
| 1 | 0.343997  | 4.466439  | -5.710626 | 1 | 0.072539  | 4.084230  | -6.119589 |
| 6 | 1.711220  | -1.755444 | -5.890045 | 6 | 1.220763  | -2.170355 | -6.202239 |
| 1 | 0.774333  | -1.733887 | -3.975223 | 1 | 0.460529  | -2.063814 | -4.212412 |
| 6 | 2.204708  | -3.105048 | -5.920062 | 6 | 1.668135  | -3.531141 | -6.238438 |
| 1 | 1.929334  | -1.163541 | -6.777737 | 1 | 1.376918  | -1.607520 | -7.120996 |
| 6 | 2.032120  | -4.044609 | -4.868514 | 6 | 1.557040  | -4.439363 | -5.149778 |
| 6 | 2.914261  | -3.563960 | -7.060556 | 6 | 2.265613  | -4.035570 | -7.424722 |
| 6 | 2.525472  | -5.333362 | -4.947745 | 6 | 2.004248  | -5.741139 | -5.236709 |
| 6 | 3.237659  | -5.785591 | -6.098060 | 6 | 2.604953  | -6.240290 | -6.433437 |
| 6 | 3.414727  | -4.850360 | -7.157229 | 6 | 2.719631  | -5.335521 | -7.529897 |
| 1 | 1.497825  | -3.757817 | -3.967414 | 1 | 1.109345  | -4.114328 | -4.215462 |
| 1 | 2.360463  | -6.002975 | -4.112052 | 1 | 1.892681  | -6.386868 | -4.374288 |
| 7 | 3.728169  | -7.061319 | -6.178080 | 7 | 3.048726  | -7.526822 | -6.520882 |
| 1 | 3.070331  | -2.879276 | -7.891495 | 1 | 2.369354  | -3.373913 | -8.281665 |
| 1 | 3.946277  | -5.136431 | -8.056982 | 1 | 3.165214  | -5.659445 | -8.462502 |
| 6 | 3.525128  | -8.001802 | -5.080207 | 6 | 2.910676  | -8.439016 | -5.386776 |
| 6 | 4.445734  | -7.500901 | -7.370710 | 6 | 3.664688  | -8.014454 | -7.753559 |
| 1 | 5.343755  | -6.894027 | -7.544459 | 1 | 4.558594  | -7.432110 | -8.008617 |
| 1 | 3.811093  | -7.445010 | -8.264883 | 1 | 2.963483  | -7.966145 | -8.596077 |
| 1 | 4.756134  | -8.537082 | -7.237585 | 1 | 3.962198  | -9.053330 | -7.615117 |
| 1 | 2.457770  | -8.182028 | -4.896876 | 1 | 1.858039  | -8.572213 | -5.108222 |
| 1 | 3.980224  | -7.637111 | -4.150340 | 1 | 3.461232  | -8.073221 | -4.511202 |
| 1 | 3.991647  | -8.952809 | -5.336356 | 1 | 3.315998  | -9.411733 | -5.663093 |

|   |           |           |           |   |           |           |           |
|---|-----------|-----------|-----------|---|-----------|-----------|-----------|
| 8 | -0.614671 | 5.198865  | -3.285295 | 8 | -0.157574 | 5.209592  | -3.548779 |
| 1 | -2.594876 | 4.567168  | -3.221416 | 1 | -2.411177 | 4.508842  | -3.269885 |
| 1 | -1.799369 | 4.346850  | -4.765716 | 1 | -1.783234 | 4.189887  | -4.938465 |
| 6 | -0.838731 | 6.509571  | -3.560585 | 6 | -0.425563 | 6.464924  | -3.679628 |
| 6 | 0.260045  | 7.379217  | -3.077237 | 6 | 0.679516  | 7.393576  | -3.214083 |
| 8 | -1.847899 | 6.886107  | -4.139866 | 8 | -1.496441 | 6.939616  | -4.109444 |
| 6 | 0.327060  | 8.801531  | -3.403894 | 6 | 1.034328  | 8.617022  | -3.914350 |
| 6 | 1.247306  | 6.814268  | -2.290800 | 6 | 1.362112  | 7.042340  | -2.074737 |
| 7 | 2.290965  | 7.481522  | -1.758695 | 7 | 2.324744  | 7.792856  | -1.475537 |
| 1 | 1.212685  | 5.759927  | -2.054549 | 1 | 1.136432  | 6.107701  | -1.577304 |
| 6 | 1.507344  | 9.496103  | -2.848379 | 6 | 2.113241  | 9.396150  | -3.275290 |
| 8 | -0.499940 | 9.418182  | -4.101314 | 8 | 0.524955  | 8.995247  | -4.992123 |
| 6 | 2.469643  | 8.844023  | -2.048962 | 6 | 2.743826  | 8.982214  | -2.079746 |
| 6 | 3.285984  | 6.756446  | -0.977410 | 6 | 2.992675  | 7.290546  | -0.284361 |
| 6 | 2.847471  | 5.710684  | 0.012312  | 6 | 2.189299  | 6.624111  | 0.800752  |
| 6 | 3.417290  | 7.018801  | 0.502561  | 6 | 2.793861  | 7.985220  | 1.041082  |
| 1 | 4.198252  | 6.565786  | -1.538039 | 1 | 3.980959  | 6.885756  | -0.492813 |
| 1 | 2.720749  | 7.724786  | 0.945893  | 1 | 2.113203  | 8.831744  | 1.060355  |
| 1 | 4.420555  | 7.040871  | 0.918391  | 1 | 3.658094  | 8.076114  | 1.693049  |
| 1 | 3.454225  | 4.812333  | 0.074161  | 1 | 2.635048  | 5.755969  | 1.277119  |
| 1 | 1.784120  | 5.547858  | 0.160316  | 1 | 1.110326  | 6.573569  | 0.689526  |
| 6 | 1.693063  | 10.864865 | -3.122063 | 6 | 2.544772  | 10.599603 | -3.869100 |
| 6 | 2.786264  | 11.528393 | -2.629783 | 6 | 3.551631  | 11.333023 | -3.299842 |
| 6 | 3.793330  | 10.896984 | -1.853257 | 6 | 4.232282  | 10.931265 | -2.120311 |
| 6 | 3.598829  | 9.537309  | -1.577008 | 6 | 3.797965  | 9.739683  | -1.529831 |
| 1 | 0.950335  | 11.394043 | -3.709026 | 1 | 2.055632  | 10.949853 | -4.771626 |
| 1 | 4.341125  | 9.005551  | -1.000427 | 1 | 4.291465  | 9.383258  | -0.637633 |
| 9 | 2.888697  | 12.868914 | -2.868525 | 9 | 3.891470  | 12.525234 | -3.876749 |
| 7 | 4.874706  | 11.631541 | -1.354444 | 7 | 5.239634  | 11.738027 | -1.571517 |
| 6 | 5.724353  | 12.337741 | -2.335609 | 6 | 6.405731  | 12.027628 | -2.431098 |
| 6 | 5.682583  | 11.023973 | -0.292756 | 6 | 5.655623  | 11.460652 | -0.193918 |
| 6 | 6.560427  | 13.414452 | -1.649397 | 6 | 7.195458  | 13.215204 | -1.887588 |
| 1 | 5.100658  | 12.804245 | -3.096951 | 1 | 6.070887  | 12.257653 | -3.441982 |
| 1 | 6.390903  | 11.612738 | -2.832311 | 1 | 7.059002  | 11.139700 | -2.477796 |
| 6 | 6.520693  | 12.090214 | 0.416649  | 6 | 6.437286  | 12.645923 | 0.376861  |
| 1 | 6.348794  | 10.240946 | -0.694115 | 1 | 6.278682  | 10.551137 | -0.137588 |
| 1 | 5.018009  | 10.566022 | 0.444618  | 1 | 4.766698  | 11.307021 | 0.423933  |
| 7 | 7.328685  | 12.837568 | -0.547575 | 7 | 7.565092  | 12.985950 | -0.491739 |
| 1 | 7.173585  | 11.611147 | 1.143788  | 1 | 6.806827  | 12.391208 | 1.368407  |
| 1 | 5.853235  | 12.783284 | 0.950314  | 1 | 5.768740  | 13.515291 | 0.466302  |
| 1 | 5.900132  | 14.206452 | -1.264804 | 1 | 6.587072  | 14.129198 | -1.963007 |
| 1 | 7.252984  | 13.858007 | -2.364615 | 1 | 8.104588  | 13.355533 | -2.472323 |
| 6 | 8.609404  | 13.263164 | -0.320361 | 6 | 8.794618  | 13.385400 | -0.043264 |
| 8 | 9.222481  | 14.010779 | -1.083990 | 8 | 9.686359  | 13.801987 | -0.784520 |
| 8 | 9.108790  | 12.748517 | 0.824458  | 8 | 8.904202  | 13.247405 | 1.296229  |
| 6 | 10.501538 | 12.996871 | 1.264901  | 6 | 10.158268 | 13.548289 | 2.025477  |
| 6 | 10.577723 | 12.200443 | 2.570677  | 6 | 9.779130  | 13.225407 | 3.473641  |
| 6 | 10.712535 | 14.490255 | 1.532606  | 6 | 10.511133 | 15.031795 | 1.879783  |
| 6 | 11.488005 | 12.437898 | 0.235022  | 6 | 11.282180 | 12.625204 | 1.544902  |
| 1 | 11.269435 | 11.384110 | 0.027589  | 1 | 10.972163 | 11.576179 | 1.613451  |
| 1 | 12.504647 | 12.499806 | 0.639707  | 1 | 12.159992 | 12.761696 | 2.186819  |
| 1 | 11.452289 | 12.998737 | -0.701059 | 1 | 11.568362 | 12.844092 | 0.514298  |
| 1 | 9.953725  | 14.865377 | 2.228838  | 1 | 9.661933  | 15.658113 | 2.176207  |
| 1 | 10.667403 | 15.073242 | 0.610799  | 1 | 10.792746 | 15.278287 | 0.854328  |
| 1 | 11.696705 | 14.638179 | 1.991774  | 1 | 11.353401 | 15.268309 | 2.540017  |
| 1 | 9.842532  | 12.568941 | 3.294322  | 1 | 8.946226  | 13.853954 | 3.807015  |
| 1 | 11.575833 | 12.302830 | 3.009563  | 1 | 10.635566 | 13.409412 | 4.130886  |
| 1 | 10.387044 | 11.137029 | 2.389715  | 1 | 9.485900  | 12.174760 | 3.574144  |
| 9 | 0.591402  | -0.423453 | -1.864168 | 9 | -1.567827 | -1.277247 | -2.847822 |



|                                          |           |            |           |   |          |           |           |
|------------------------------------------|-----------|------------|-----------|---|----------|-----------|-----------|
| 9                                        | -1.396164 | -1.087613  | -2.789835 | 9 | 0.538467 | -0.682688 | -2.165984 |
| Products T <sub>1</sub> (implicit water) |           |            |           |   |          |           |           |
| 6                                        | -3.939495 | -9.053435  | 5.596117  |   |          |           |           |
| 6                                        | -4.503076 | -7.834796  | 6.086632  |   |          |           |           |
| 6                                        | -4.555674 | -6.713242  | 5.289790  |   |          |           |           |
| 6                                        | -3.439383 | -9.052632  | 4.253910  |   |          |           |           |
| 6                                        | -3.499767 | -7.922523  | 3.472448  |   |          |           |           |
| 6                                        | -4.059588 | -6.703359  | 3.954723  |   |          |           |           |
| 1                                        | -4.896650 | -7.780737  | 7.093826  |   |          |           |           |
| 1                                        | -4.990406 | -5.801947  | 5.693004  |   |          |           |           |
| 1                                        | -3.106058 | -7.976393  | 2.462447  |   |          |           |           |
| 6                                        | -4.146305 | -5.502987  | 3.191324  |   |          |           |           |
| 7                                        | -3.879666 | -10.167420 | 6.369497  |   |          |           |           |
| 1                                        | -3.002769 | -9.951310  | 3.836499  |   |          |           |           |
| 6                                        | -4.388795 | -10.148403 | 7.742541  |   |          |           |           |
| 6                                        | -3.304038 | -11.409321 | 5.848246  |   |          |           |           |
| 1                                        | -2.250777 | -11.273207 | 5.576575  |   |          |           |           |
| 1                                        | -3.854570 | -11.760073 | 4.967853  |   |          |           |           |
| 1                                        | -3.363821 | -12.176752 | 6.618519  |   |          |           |           |
| 1                                        | -5.460791 | -9.920014  | 7.762796  |   |          |           |           |
| 1                                        | -3.857117 | -9.406751  | 8.349787  |   |          |           |           |
| 1                                        | -4.237836 | -11.129885 | 8.189357  |   |          |           |           |
| 6                                        | -3.710451 | -5.314564  | 1.890646  |   |          |           |           |
| 1                                        | -4.604605 | -4.659016  | 3.703217  |   |          |           |           |
| 6                                        | -3.825441 | -4.090903  | 1.196004  |   |          |           |           |
| 1                                        | -3.249778 | -6.139225  | 1.359283  |   |          |           |           |
| 6                                        | -4.377946 | -2.852731  | 1.629624  |   |          |           |           |
| 6                                        | -4.250531 | -1.924737  | 0.614066  |   |          |           |           |
| 7                                        | -3.369955 | -3.907738  | -0.102661 |   |          |           |           |
| 6                                        | -3.601575 | -2.609889  | -0.474452 |   |          |           |           |
| 1                                        | -4.830654 | -2.669761  | 2.595163  |   |          |           |           |
| 6                                        | -4.742767 | -0.509035  | 0.697052  |   |          |           |           |
| 1                                        | -5.304078 | -0.371043  | 1.626007  |   |          |           |           |
| 1                                        | -5.407753 | -0.252940  | -0.135994 |   |          |           |           |
| 1                                        | -3.920536 | 0.217312   | 0.700938  |   |          |           |           |
| 5                                        | -2.717428 | -4.999716  | -0.976982 |   |          |           |           |
| 7                                        | -2.476141 | -4.403486  | -2.380259 |   |          |           |           |
| 6                                        | -3.201384 | -2.129551  | -1.791493 |   |          |           |           |
| 6                                        | -2.706965 | -3.106193  | -2.754542 |   |          |           |           |
| 6                                        | -3.255615 | -0.796451  | -2.102986 |   |          |           |           |
| 6                                        | -1.993992 | -5.107840  | -3.475341 |   |          |           |           |
| 6                                        | -2.381730 | -2.961800  | -4.150511 |   |          |           |           |
| 6                                        | -1.946274 | -4.202999  | -4.573162 |   |          |           |           |
| 6                                        | -2.490386 | -1.757752  | -5.040385 |   |          |           |           |
| 6                                        | -1.628332 | -6.470239  | -3.418159 |   |          |           |           |
| 1                                        | -1.626405 | -4.448247  | -5.577279 |   |          |           |           |
| 1                                        | -3.491438 | -1.311676  | -5.013073 |   |          |           |           |
| 1                                        | -2.283105 | -2.048312  | -6.074636 |   |          |           |           |
| 1                                        | -1.770475 | -0.975096  | -4.770277 |   |          |           |           |
| 6                                        | -1.134941 | -7.180157  | -4.499747 |   |          |           |           |
| 1                                        | -1.746356 | -6.969942  | -2.463772 |   |          |           |           |
| 6                                        | -0.740730 | -8.549793  | -4.512716 |   |          |           |           |
| 1                                        | -1.028462 | -6.657199  | -5.448168 |   |          |           |           |
| 6                                        | -0.795697 | -9.411613  | -3.378336 |   |          |           |           |
| 6                                        | -0.254866 | -9.120012  | -5.724200 |   |          |           |           |
| 6                                        | -0.399714 | -10.726898 | -3.446209 |   |          |           |           |
| 6                                        | 0.088494  | -11.291983 | -4.668481 |   |          |           |           |
| 6                                        | 0.145285  | -10.434551 | -5.810808 |   |          |           |           |

|   |           |            |           |
|---|-----------|------------|-----------|
| 1 | -1.157520 | -9.034347  | -2.427083 |
| 1 | -0.463340 | -11.336556 | -2.553598 |
| 7 | 0.481112  | -12.589549 | -4.737134 |
| 1 | -0.198004 | -8.493729  | -6.611096 |
| 1 | 0.506124  | -10.811243 | -6.759656 |
| 6 | 0.420540  | -13.452338 | -3.555082 |
| 6 | 0.970771  | -13.153266 | -5.996964 |
| 1 | 1.866808  | -12.625364 | -6.343371 |
| 1 | 0.203502  | -13.098585 | -6.777889 |
| 1 | 1.227316  | -14.199824 | -5.839991 |
| 1 | -0.608562 | -13.551735 | -3.190843 |
| 1 | 1.046090  | -13.057553 | -2.746319 |
| 1 | 0.788148  | -14.442227 | -3.821147 |
| 8 | -2.203003 | 3.845090   | -2.126872 |
| 1 | -3.591469 | -0.056913  | -1.392632 |
| 1 | -2.936740 | -0.420800  | -3.062939 |
| 6 | -2.464786 | 5.005343   | -1.691004 |
| 6 | -1.280267 | 5.829310   | -1.187969 |
| 8 | -3.609921 | 5.528429   | -1.593094 |
| 6 | -1.025980 | 7.194178   | -1.609994 |
| 6 | -0.426930 | 5.230365   | -0.297674 |
| 7 | 0.631366  | 5.840560   | 0.312167  |
| 1 | -0.573011 | 4.193854   | -0.018827 |
| 6 | 0.149543  | 7.825623   | -0.981790 |
| 8 | -1.701332 | 7.808956   | -2.468932 |
| 6 | 0.959609  | 7.150430   | -0.038641 |
| 6 | 1.477692  | 5.079075   | 1.216512  |
| 6 | 0.852092  | 4.147503   | 2.220824  |
| 6 | 1.511758  | 5.421627   | 2.686699  |
| 1 | 2.412115  | 4.760775   | 0.758011  |
| 1 | 0.858887  | 6.221321   | 3.025081  |
| 1 | 2.472766  | 5.369534   | 3.190809  |
| 1 | 1.354290  | 3.199644   | 2.390435  |
| 1 | -0.231327 | 4.100852   | 2.277048  |
| 6 | 0.493384  | 9.150330   | -1.322584 |
| 6 | 1.585670  | 9.752232   | -0.757420 |
| 6 | 2.441806  | 9.095090   | 0.165404  |
| 6 | 2.097049  | 7.783867   | 0.505989  |
| 1 | -0.131256 | 9.694811   | -2.022604 |
| 1 | 2.724296  | 7.236015   | 1.193805  |
| 9 | 1.843135  | 11.058820  | -1.071484 |
| 7 | 3.532355  | 9.775752   | 0.729930  |
| 6 | 4.553959  | 10.285058  | -0.207367 |
| 6 | 4.155760  | 9.186543   | 1.917909  |
| 6 | 5.438735  | 11.326448  | 0.472334  |
| 1 | 4.068360  | 10.741591  | -1.069395 |
| 1 | 5.176983  | 9.447781   | -0.565959 |
| 6 | 5.035670  | 10.218474  | 2.626570  |
| 1 | 4.766425  | 8.304583   | 1.656796  |
| 1 | 3.372907  | 8.868617   | 2.611921  |
| 7 | 6.018497  | 10.781385  | 1.699184  |
| 1 | 5.552415  | 9.742688   | 3.458012  |
| 1 | 4.403253  | 11.026039  | 3.025019  |
| 1 | 4.841407  | 12.219533  | 0.710970  |
| 1 | 6.247820  | 11.620209  | -0.196373 |
| 6 | 7.303650  | 11.106221  | 2.039404  |
| 8 | 8.070947  | 11.716493  | 1.293051  |
| 8 | 7.619241  | 10.659189  | 3.274646  |
| 6 | 8.970098  | 10.827895  | 3.859233  |

|                                     |           |           |           |                                     |                               |
|-------------------------------------|-----------|-----------|-----------|-------------------------------------|-------------------------------|
| 6                                   | 8.820617  | 10.153180 | 5.225816  |                                     |                               |
| 6                                   | 9.290223  | 12.316534 | 4.026346  |                                     |                               |
| 6                                   | 10.010054 | 10.093645 | 3.007407  |                                     |                               |
| 1                                   | 9.717053  | 9.047535  | 2.862282  |                                     |                               |
| 1                                   | 10.975052 | 10.106160 | 3.526900  |                                     |                               |
| 1                                   | 10.135093 | 10.566039 | 2.031132  |                                     |                               |
| 1                                   | 8.495679  | 12.817914 | 4.590758  |                                     |                               |
| 1                                   | 9.406697  | 12.812593 | 3.060926  |                                     |                               |
| 1                                   | 10.224768 | 12.423274 | 4.588956  |                                     |                               |
| 1                                   | 8.044971  | 10.647508 | 5.820757  |                                     |                               |
| 1                                   | 9.766805  | 10.212387 | 5.774002  |                                     |                               |
| 1                                   | 8.553033  | 9.097134  | 5.111262  |                                     |                               |
| 9                                   | -3.577483 | -6.117802 | -1.071243 |                                     |                               |
| 9                                   | -1.496352 | -5.424600 | -0.404947 |                                     |                               |
| Min S <sub>0</sub> (explicit water) |           |           |           | Min S <sub>1</sub> (explicit water) |                               |
| 6                                   | -1.044450 | -4.176343 | 4.109990  | 6                                   | -1.040071 -4.213389 3.978642  |
| 6                                   | -1.584302 | -2.987314 | 4.672672  | 6                                   | -1.564876 -3.039388 4.578888  |
| 6                                   | -1.756353 | -1.848910 | 3.899598  | 6                                   | -1.733227 -1.886463 3.844370  |
| 6                                   | -0.695760 | -4.137093 | 2.728396  | 6                                   | -0.701205 -4.140940 2.599491  |
| 6                                   | -0.874650 | -2.990036 | 1.974255  | 6                                   | -0.875664 -2.980024 1.882404  |
| 6                                   | -1.410187 | -1.802884 | 2.529363  | 6                                   | -1.397975 -1.804401 2.473174  |
| 1                                   | -1.869876 | -2.955696 | 5.717350  | 1                                   | -1.840722 -3.037211 5.625621  |
| 1                                   | -2.173063 | -0.959408 | 4.367997  | 1                                   | -2.138704 -1.006736 4.337900  |
| 1                                   | -0.590906 | -3.019610 | 0.925903  | 1                                   | -0.599987 -2.982018 0.832692  |
| 6                                   | -1.615279 | -0.577477 | 1.785798  | 6                                   | -1.597244 -0.572471 1.772401  |
| 7                                   | -0.866650 | -5.309994 | 4.859816  | 7                                   | -0.868133 -5.360072 4.690476  |
| 1                                   | -0.281759 | -5.014522 | 2.245892  | 1                                   | -0.297171 -5.008292 2.093147  |
| 6                                   | -1.234296 | -5.321234 | 6.271241  | 6                                   | -1.214895 -5.404606 6.101405  |
| 6                                   | -0.318651 | -6.518133 | 4.252768  | 6                                   | -0.332418 -6.550146 4.049887  |
| 1                                   | 0.691351  | -6.348211 | 3.856726  | 1                                   | 0.678181 -6.377161 3.661463   |
| 1                                   | -0.953739 | -6.882851 | 3.434404  | 1                                   | -0.970241 -6.881740 3.222253  |
| 1                                   | -0.258534 | -7.300425 | 5.009491  | 1                                   | -0.281530 -7.354816 4.781517  |
| 1                                   | -2.305822 | -5.124395 | 6.411043  | 1                                   | -2.280504 -5.200454 6.259519  |
| 1                                   | -0.668724 | -4.571422 | 6.840309  | 1                                   | -0.632942 -4.677647 6.680077  |
| 1                                   | -1.012027 | -6.302924 | 6.689654  | 1                                   | -0.998487 -6.398443 6.489717  |
| 6                                   | -1.330716 | -0.348659 | 0.469879  | 6                                   | -1.319184 -0.323822 0.449534  |
| 1                                   | -2.044481 | 0.237580  | 2.367650  | 1                                   | -2.011597 0.237098 2.370373   |
| 6                                   | -1.566537 | 0.903878  | -0.190659 | 6                                   | -1.537291 0.916947 -0.187236  |
| 1                                   | -0.899922 | -1.139622 | -0.133594 | 1                                   | -0.904119 -1.115123 -0.163783 |
| 6                                   | -2.117707 | 2.101815  | 0.337785  | 6                                   | -2.061146 2.124308 0.345999   |
| 6                                   | -2.162668 | 3.056801  | -0.662565 | 6                                   | -2.100114 3.076772 -0.643994  |
| 7                                   | -1.270668 | 1.123062  | -1.509352 | 7                                   | -1.251367 1.146568 -1.518389  |
| 6                                   | -1.619661 | 2.434514  | -1.844862 | 6                                   | -1.580602 2.447548 -1.837356  |
| 1                                   | -2.448409 | 2.246524  | 1.357931  | 1                                   | -2.376470 2.271996 1.370654   |
| 6                                   | -2.697319 | 4.446515  | -0.455407 | 6                                   | -2.596842 4.476681 -0.443812  |
| 1                                   | -2.925055 | 4.593536  | 0.604810  | 1                                   | -2.779411 4.647734 0.620507   |
| 1                                   | -3.626600 | 4.620897  | -1.012335 | 1                                   | -3.541889 4.662854 -0.966872  |
| 1                                   | -1.982508 | 5.221910  | -0.749082 | 1                                   | -1.877386 5.229487 -0.779389  |
| 5                                   | -0.656170 | 0.095538  | -2.479283 | 5                                   | -0.666095 0.120723 -2.486078  |
| 7                                   | -0.486868 | 0.774273  | -3.852580 | 7                                   | -0.480410 0.801358 -3.840548  |
| 6                                   | -1.408591 | 2.916014  | -3.150537 | 6                                   | -1.383243 2.946973 -3.144634  |
| 6                                   | -0.839390 | 2.095575  | -4.144281 | 6                                   | -0.808997 2.110226 -4.128703  |
| 6                                   | -1.789416 | 4.331059  | -3.491309 | 6                                   | -1.761263 4.347772 -3.480411  |
| 6                                   | 0.034718  | 0.190677  | -4.976033 | 6                                   | 0.055198 0.206917 -4.965914   |
| 6                                   | -0.507564 | 2.339233  | -5.527129 | 6                                   | -0.450497 2.361571 -5.507299  |
| 6                                   | 0.026172  | 1.159303  | -6.014839 | 6                                   | 0.071837 1.186988 -5.993273   |
| 6                                   | -0.659408 | 3.581912  | -6.360286 | 6                                   | -0.572357 3.620880 -6.311787  |
| 6                                   | 0.488484  | -1.170747 | -5.015543 | 6                                   | 0.483541 -1.137555 -5.002212  |

|   |           |           |           |   |           |           |           |
|---|-----------|-----------|-----------|---|-----------|-----------|-----------|
| 1 | 0.383987  | 1.004096  | -7.024222 | 1 | 0.444211  | 1.035863  | -6.998092 |
| 1 | -1.711148 | 3.834131  | -6.544735 | 1 | -1.614535 | 3.879806  | -6.530855 |
| 1 | -0.190757 | 3.422733  | -7.336308 | 1 | -0.066008 | 3.486669  | -7.271488 |
| 1 | -0.181191 | 4.456178  | -5.905699 | 1 | -0.112321 | 4.481848  | -5.816405 |
| 6 | 0.995507  | -1.768638 | -6.133708 | 6 | 1.009139  | -1.751350 | -6.114098 |
| 1 | 0.409641  | -1.733545 | -4.092287 | 1 | 0.379919  | -1.702259 | -4.082979 |
| 6 | 1.471316  | -3.129976 | -6.263759 | 6 | 1.460154  | -3.106126 | -6.211806 |
| 1 | 1.060058  | -1.178345 | -7.047111 | 1 | 1.101025  | -1.166771 | -7.027522 |
| 6 | 1.477885  | -4.074212 | -5.209041 | 6 | 1.429661  | -4.032911 | -5.142264 |
| 6 | 1.965205  | -3.575994 | -7.511387 | 6 | 1.974618  | -3.581639 | -7.440065 |
| 6 | 1.943456  | -5.366161 | -5.383842 | 6 | 1.875128  | -5.326428 | -5.285426 |
| 6 | 2.442925  | -5.808922 | -6.643352 | 6 | 2.390998  | -5.795619 | -6.524733 |
| 6 | 2.435447  | -4.865846 | -7.707448 | 6 | 2.424805  | -4.873190 | -7.602745 |
| 1 | 1.108347  | -3.793484 | -4.226660 | 1 | 1.045667  | -3.729128 | -4.173733 |
| 1 | 1.920414  | -6.043583 | -4.538519 | 1 | 1.825973  | -5.990085 | -4.431655 |
| 7 | 2.909304  | -7.086211 | -6.817798 | 7 | 2.832441  | -7.074519 | -6.668347 |
| 1 | 1.977482  | -2.884095 | -8.351210 | 1 | 2.016579  | -2.902785 | -8.288095 |
| 1 | 2.799245  | -5.143895 | -8.689435 | 1 | 2.807202  | -5.175431 | -8.569341 |
| 6 | 2.881641  | -8.039238 | -5.713531 | 6 | 2.785434  | -7.999023 | -5.547295 |
| 6 | 3.378864  | -7.523369 | -8.127738 | 6 | 3.344207  | -7.533024 | -7.949297 |
| 1 | 4.228949  | -6.919603 | -8.471497 | 1 | 4.221972  | -6.954604 | -8.260612 |
| 1 | 2.584125  | -7.462599 | -8.883822 | 1 | 2.583208  | -7.458621 | -8.735101 |
| 1 | 3.705867  | -8.561084 | -8.060857 | 1 | 3.639744  | -8.577202 | -7.861158 |
| 1 | 1.856483  | -8.232747 | -5.368949 | 1 | 1.757530  | -8.159626 | -5.200931 |
| 1 | 3.471123  | -7.680981 | -4.859752 | 1 | 3.383362  | -7.636186 | -4.703225 |
| 1 | 3.312048  | -8.983205 | -6.048070 | 1 | 3.191623  | -8.958960 | -5.861670 |
| 8 | -0.644664 | 5.196028  | -3.191892 | 8 | -0.627376 | 5.229835  | -3.177968 |
| 1 | -2.639282 | 4.678653  | -2.909231 | 1 | -2.611417 | 4.700518  | -2.902649 |
| 1 | -2.037963 | 4.441934  | -4.542262 | 1 | -2.002085 | 4.466163  | -4.531571 |
| 6 | -0.793199 | 6.516224  | -3.500774 | 6 | -0.772591 | 6.533742  | -3.492887 |
| 6 | 0.335528  | 7.342663  | -3.039262 | 6 | 0.349163  | 7.366671  | -3.033785 |
| 8 | -1.780324 | 6.930982  | -4.091637 | 8 | -1.754604 | 6.945364  | -4.087224 |
| 6 | 0.662561  | 8.609584  | -3.689527 | 6 | 0.660975  | 8.635749  | -3.671491 |
| 6 | 1.070516  | 6.916188  | -1.949237 | 6 | 1.092511  | 6.937904  | -1.959624 |
| 7 | 2.084134  | 7.606082  | -1.391733 | 7 | 2.100449  | 7.626194  | -1.405004 |
| 1 | 0.838548  | 5.979079  | -1.461829 | 1 | 0.874406  | 5.991975  | -1.483475 |
| 6 | 1.813939  | 9.312387  | -3.093166 | 6 | 1.804378  | 9.344413  | -3.073717 |
| 8 | 0.069647  | 9.069372  | -4.682273 | 8 | 0.065047  | 9.098253  | -4.652628 |
| 6 | 2.510147  | 8.814096  | -1.970928 | 6 | 2.506827  | 8.841619  | -1.969836 |
| 6 | 2.795686  | 7.042121  | -0.250130 | 6 | 2.827333  | 7.056448  | -0.284418 |
| 6 | 2.028040  | 6.366585  | 0.854642  | 6 | 2.072917  | 6.377117  | 0.818145  |
| 6 | 2.687107  | 7.700841  | 1.102509  | 6 | 2.730501  | 7.704383  | 1.066185  |
| 1 | 3.756067  | 6.614818  | -0.528475 | 1 | 3.783951  | 6.632580  | -0.576507 |
| 1 | 2.034397  | 8.565449  | 1.183101  | 1 | 2.079560  | 8.568480  | 1.154283  |
| 1 | 3.587253  | 7.746730  | 1.708696  | 1 | 3.633945  | 7.747025  | 1.665810  |
| 1 | 2.470726  | 5.469964  | 1.277759  | 1 | 2.518680  | 5.479986  | 1.233973  |
| 1 | 0.943326  | 6.353232  | 0.803259  | 1 | 0.988780  | 6.363027  | 0.772852  |
| 6 | 2.248235  | 10.527534 | -3.656810 | 6 | 2.215903  | 10.567835 | -3.624277 |
| 6 | 3.324136  | 11.190673 | -3.127692 | 6 | 3.280564  | 11.234370 | -3.093131 |
| 6 | 4.070269  | 10.703050 | -2.022144 | 6 | 4.032843  | 10.741682 | -2.002093 |
| 6 | 3.626926  | 9.498358  | -1.459806 | 6 | 3.614449  | 9.531311  | -1.455747 |
| 1 | 1.710030  | 10.944325 | -4.501132 | 1 | 1.668249  | 10.986166 | -4.460866 |
| 1 | 4.166001  | 9.077250  | -0.624220 | 1 | 4.162066  | 9.107297  | -0.627964 |
| 9 | 3.668782  | 12.395309 | -3.668444 | 9 | 3.612700  | 12.443275 | -3.614269 |
| 7 | 5.143903  | 11.436345 | -1.508142 | 7 | 5.099338  | 11.482776 | -1.490601 |
| 6 | 6.250427  | 11.760166 | -2.432560 | 6 | 6.193129  | 11.795558 | -2.421721 |
| 6 | 5.650256  | 11.071602 | -0.181615 | 6 | 5.616174  | 11.101790 | -0.180360 |
| 6 | 7.100908  | 12.899813 | -1.878861 | 6 | 7.055952  | 12.920503 | -1.874330 |
| 1 | 5.849548  | 12.055025 | -3.401339 | 1 | 5.784874  | 12.097632 | -3.384415 |

|                                     |           |           |           |                                    |           |           |           |
|-------------------------------------|-----------|-----------|-----------|------------------------------------|-----------|-----------|-----------|
| 1                                   | 6.879414  | 10.865843 | -2.577058 | 1                                  | 6.812498  | 10.897528 | -2.575782 |
| 6                                   | 6.496425  | 12.207617 | 0.397583  | 6                                  | 6.473508  | 12.221115 | 0.396490  |
| 1                                   | 6.253951  | 10.148798 | -0.223520 | 1                                  | 6.213517  | 10.177148 | -0.240062 |
| 1                                   | 4.804572  | 10.900436 | 0.489660  | 1                                  | 4.778709  | 10.927313 | 0.498798  |
| 7                                   | 7.565284  | 12.580535 | -0.529818 | 7                                  | 7.528978  | 12.589285 | -0.538162 |
| 1                                   | 6.930990  | 11.887059 | 1.342575  | 1                                  | 6.917164  | 11.891982 | 1.333208  |
| 1                                   | 5.854128  | 13.080621 | 0.587495  | 1                                  | 5.841699  | 13.097036 | 0.598875  |
| 1                                   | 6.508129  | 13.826859 | -1.856566 | 1                                  | 6.471434  | 13.850641 | -1.839344 |
| 1                                   | 7.968336  | 13.059160 | -2.519388 | 1                                  | 7.917594  | 13.077396 | -2.521425 |
| 6                                   | 8.827535  | 12.946556 | -0.146705 | 6                                  | 8.793199  | 12.934007 | -0.168751 |
| 8                                   | 9.668693  | 13.400035 | -0.924204 | 8                                  | 9.627656  | 13.384347 | -0.947850 |
| 8                                   | 9.029137  | 12.730283 | 1.171283  | 8                                  | 9.011317  | 12.705487 | 1.135777  |
| 6                                   | 10.334242 | 12.981373 | 1.826576  | 6                                  | 10.317273 | 12.941350 | 1.765538  |
| 6                                   | 10.055428 | 12.574479 | 3.276333  | 6                                  | 10.066075 | 12.526793 | 3.210755  |
| 6                                   | 10.688215 | 14.469432 | 1.744402  | 6                                  | 10.677674 | 14.421264 | 1.689619  |
| 6                                   | 11.413332 | 12.083535 | 1.213719  | 6                                  | 11.376051 | 12.046949 | 1.129408  |
| 1                                   | 11.098818 | 11.033944 | 1.240229  | 1                                  | 11.054483 | 11.000704 | 1.151996  |
| 1                                   | 12.334798 | 12.175914 | 1.799881  | 1                                  | 12.306292 | 12.128028 | 1.700436  |
| 1                                   | 11.629399 | 12.363264 | 0.180785  | 1                                  | 11.574939 | 12.335069 | 0.096606  |
| 1                                   | 9.868188  | 15.080175 | 2.139104  | 1                                  | 9.867992  | 15.031833 | 2.102069  |
| 1                                   | 10.896674 | 14.776415 | 0.717801  | 1                                  | 10.870205 | 14.733926 | 0.662919  |
| 1                                   | 11.578248 | 14.662045 | 2.354317  | 1                                  | 11.577337 | 14.603459 | 2.285806  |
| 1                                   | 9.252646  | 13.184773 | 3.704126  | 1                                  | 9.275503  | 13.137753 | 3.656680  |
| 1                                   | 10.957234 | 12.717036 | 3.881081  | 1                                  | 10.978778 | 12.659143 | 3.798808  |
| 1                                   | 9.762593  | 11.520588 | 3.335454  | 1                                  | 9.768148  | 11.475438 | 3.265724  |
| 8                                   | 2.172479  | 3.933944  | -3.071771 | 8                                  | 2.021104  | 3.928807  | -2.791183 |
| 1                                   | 2.160388  | 2.968418  | -3.168831 | 1                                  | 2.014031  | 2.960727  | -2.827672 |
| 1                                   | 1.242755  | 4.203413  | -3.178860 | 1                                  | 1.108930  | 4.196297  | -2.999728 |
| 8                                   | -4.348256 | 6.458166  | -5.278016 | 8                                  | -4.194734 | 6.143744  | -5.260746 |
| 1                                   | -4.557959 | 7.286528  | -5.736700 | 1                                  | -4.512609 | 6.900997  | -5.773129 |
| 1                                   | -3.468252 | 6.604448  | -4.877595 | 1                                  | -3.351244 | 6.432737  | -4.860194 |
| 9                                   | 0.602664  | -0.347291 | -1.993030 | 9                                  | 0.576731  | -0.365470 | -2.001732 |
| 9                                   | -1.500301 | -1.040639 | -2.592309 | 9                                  | -1.526397 | -1.001948 | -2.604702 |
| Min T <sub>1</sub> (explicit water) |           |           |           | TS T <sub>1</sub> (explicit water) |           |           |           |
| 6                                   | -1.042338 | -4.281280 | 4.000360  | 6                                  | -0.893194 | -4.236799 | 4.031874  |
| 6                                   | -1.563355 | -3.101584 | 4.604896  | 6                                  | -1.395202 | -3.045025 | 4.632358  |
| 6                                   | -1.733549 | -1.942293 | 3.869671  | 6                                  | -1.594835 | -1.903317 | 3.880745  |
| 6                                   | -0.709596 | -4.206270 | 2.614906  | 6                                  | -0.610840 | -4.191289 | 2.632158  |
| 6                                   | -0.885311 | -3.039217 | 1.896054  | 6                                  | -0.816476 | -3.041787 | 1.897300  |
| 6                                   | -1.403570 | -1.857706 | 2.491436  | 6                                  | -1.316354 | -1.849336 | 2.488829  |
| 1                                   | -1.834591 | -3.098068 | 5.653798  | 1                                  | -1.626881 | -3.020965 | 5.690195  |
| 1                                   | -2.134732 | -1.062215 | 4.367878  | 1                                  | -1.979157 | -1.013038 | 4.373536  |
| 1                                   | -0.614321 | -3.042782 | 0.844300  | 1                                  | -0.584622 | -3.065761 | 0.836727  |
| 6                                   | -1.603960 | -0.618635 | 1.792537  | 6                                  | -1.546955 | -0.628418 | 1.773468  |
| 7                                   | -0.868485 | -5.435602 | 4.714496  | 7                                  | -0.690797 | -5.372570 | 4.760700  |
| 1                                   | -0.310005 | -5.073951 | 2.103619  | 1                                  | -0.228042 | -5.069018 | 2.125732  |
| 6                                   | -1.209457 | -5.482503 | 6.133214  | 6                                  | -0.989348 | -5.395743 | 6.191075  |
| 6                                   | -0.334028 | -6.631481 | 4.069459  | 6                                  | -0.173362 | -6.581746 | 4.123123  |
| 1                                   | 0.676008  | -6.458314 | 3.675966  | 1                                  | 0.817873  | -6.409292 | 3.685744  |
| 1                                   | -0.976589 | -6.962651 | 3.243590  | 1                                  | -0.847256 | -6.936661 | 3.333423  |
| 1                                   | -0.280503 | -7.436388 | 4.802167  | 1                                  | -0.083281 | -7.366943 | 4.873009  |
| 1                                   | -2.274807 | -5.274392 | 6.296804  | 1                                  | -2.049318 | -5.185001 | 6.380619  |
| 1                                   | -0.621389 | -4.757525 | 6.710737  | 1                                  | -0.383926 | -4.661197 | 6.736703  |
| 1                                   | -0.994258 | -6.479059 | 6.518098  | 1                                  | -0.762274 | -6.385757 | 6.585166  |
| 6                                   | -1.325363 | -0.363405 | 0.461399  | 6                                  | -1.328508 | -0.403517 | 0.427559  |
| 1                                   | -2.016503 | 0.189762  | 2.394311  | 1                                  | -1.933399 | 0.193469  | 2.373978  |
| 6                                   | -1.540615 | 0.877093  | -0.176560 | 6                                  | -1.575154 | 0.827676  | -0.221080 |
| 1                                   | -0.910411 | -1.156634 | -0.150746 | 1                                  | -0.943476 | -1.208979 | -0.187479 |

|   |           |           |           |   |           |           |           |
|---|-----------|-----------|-----------|---|-----------|-----------|-----------|
| 6 | -2.066756 | 2.088267  | 0.353221  | 6 | -2.072431 | 2.048891  | 0.311561  |
| 6 | -2.100431 | 3.044879  | -0.638722 | 6 | -2.159205 | 2.982602  | -0.701540 |
| 7 | -1.245720 | 1.112040  | -1.522742 | 7 | -1.352837 | 1.033007  | -1.581291 |
| 6 | -1.570266 | 2.411970  | -1.838760 | 6 | -1.699257 | 2.320090  | -1.904833 |
| 1 | -2.388755 | 2.235270  | 1.376340  | 1 | -2.336993 | 2.219854  | 1.347018  |
| 6 | -2.606444 | 4.445326  | -0.437628 | 6 | -2.643646 | 4.390973  | -0.508517 |
| 1 | -2.807390 | 4.609465  | 0.625874  | 1 | -2.812053 | 4.575139  | 0.557102  |
| 1 | -3.544983 | 4.632101  | -0.975463 | 1 | -3.594345 | 4.578494  | -1.024227 |
| 1 | -1.885146 | 5.204822  | -0.757976 | 1 | -1.920546 | 5.132939  | -0.864659 |
| 5 | -0.661636 | 0.080095  | -2.495779 | 5 | -0.806953 | -0.023574 | -2.558264 |
| 7 | -0.478685 | 0.764589  | -3.856376 | 7 | -0.662160 | 0.636861  | -3.941050 |
| 6 | -1.367601 | 2.921341  | -3.151204 | 6 | -1.581225 | 2.799792  | -3.258417 |
| 6 | -0.798733 | 2.073614  | -4.141464 | 6 | -1.009626 | 1.926830  | -4.252305 |
| 6 | -1.739017 | 4.324777  | -3.482934 | 6 | -1.974857 | 4.109478  | -3.596707 |
| 6 | 0.051157  | 0.159485  | -4.999661 | 6 | -0.148399 | 0.014717  | -5.076869 |
| 6 | -0.446975 | 2.326215  | -5.532873 | 6 | -0.697248 | 2.157150  | -5.648227 |
| 6 | 0.065020  | 1.144944  | -6.025619 | 6 | -0.172238 | 0.973053  | -6.127173 |
| 6 | -0.569782 | 3.587777  | -6.340460 | 6 | -0.875614 | 3.395361  | -6.480116 |
| 6 | 0.470334  | -1.187862 | -5.042081 | 6 | 0.288107  | -1.329471 | -5.093714 |
| 1 | 0.427463  | 0.992522  | -7.034330 | 1 | 0.169277  | 0.802991  | -7.139995 |
| 1 | -1.614140 | 3.856760  | -6.544603 | 1 | -1.933764 | 3.637623  | -6.642576 |
| 1 | -0.079343 | 3.446658  | -7.308971 | 1 | -0.424332 | 3.239429  | -7.464959 |
| 1 | -0.094990 | 4.447502  | -5.854121 | 1 | -0.400010 | 4.273664  | -6.030077 |
| 6 | 0.987558  | -1.812935 | -6.162709 | 6 | 0.790872  | -1.967276 | -6.211807 |
| 1 | 0.369418  | -1.754663 | -4.123019 | 1 | 0.213431  | -1.876955 | -4.160969 |
| 6 | 1.427307  | -3.177385 | -6.260764 | 6 | 1.247519  | -3.323598 | -6.294342 |
| 1 | 1.079541  | -1.230733 | -7.078308 | 1 | 0.855958  | -1.400126 | -7.138831 |
| 6 | 1.394991  | -4.108412 | -5.188056 | 6 | 1.248052  | -4.235610 | -5.203468 |
| 6 | 1.932412  | -3.660891 | -7.496204 | 6 | 1.736946  | -3.819112 | -7.532534 |
| 6 | 1.829965  | -5.411831 | -5.334998 | 6 | 1.698969  | -5.532624 | -5.336075 |
| 6 | 2.336245  | -5.889018 | -6.580623 | 6 | 2.189651  | -6.023002 | -6.585071 |
| 6 | 2.371603  | -4.962336 | -7.661593 | 6 | 2.191989  | -5.114510 | -7.684118 |
| 1 | 1.019279  | -3.802861 | -4.215920 | 1 | 0.885542  | -3.917855 | -4.230491 |
| 1 | 1.778608  | -6.074235 | -4.479190 | 1 | 1.674009  | -6.181679 | -4.469266 |
| 7 | 2.767841  | -7.179443 | -6.727647 | 7 | 2.635925  | -7.305519 | -6.717827 |
| 1 | 1.976232  | -2.983133 | -8.346102 | 1 | 1.754569  | -3.154364 | -8.393243 |
| 1 | 2.745562  | -5.266655 | -8.631888 | 1 | 2.553024  | -5.430778 | -8.655202 |
| 6 | 2.719973  | -8.108314 | -5.602189 | 6 | 2.626617  | -8.217095 | -5.575206 |
| 6 | 3.267469  | -7.646943 | -8.017160 | 6 | 3.123989  | -7.788760 | -8.007832 |
| 1 | 4.149875  | -7.077034 | -8.335716 | 1 | 3.993909  | -7.212254 | -8.346451 |
| 1 | 2.500458  | -7.564673 | -8.798191 | 1 | 2.343819  | -7.728765 | -8.776888 |
| 1 | 3.552686  | -8.695108 | -7.929456 | 1 | 3.423575  | -8.831326 | -7.906151 |
| 1 | 1.691367  | -8.261848 | -5.250419 | 1 | 1.608060  | -8.377842 | -5.200134 |
| 1 | 3.324973  | -7.748683 | -4.760104 | 1 | 3.245266  | -7.833761 | -4.754423 |
| 1 | 3.118814  | -9.071512 | -5.919612 | 1 | 3.031886  | -9.179305 | -5.886415 |
| 8 | -0.592930 | 5.225818  | -3.177532 | 8 | -0.438379 | 5.273678  | -3.350534 |
| 1 | -2.584770 | 4.685868  | -2.903283 | 1 | -2.602765 | 4.667817  | -2.921985 |
| 1 | -1.975466 | 4.454818  | -4.534198 | 1 | -2.109595 | 4.370321  | -4.633063 |
| 6 | -0.750138 | 6.536314  | -3.490466 | 6 | -0.649298 | 6.554415  | -3.463147 |
| 6 | 0.371609  | 7.379711  | -3.030871 | 6 | 0.490448  | 7.421765  | -3.011711 |
| 8 | -1.738122 | 6.950534  | -4.085264 | 8 | -1.708528 | 7.062953  | -3.873216 |
| 6 | 0.704339  | 8.634625  | -3.699822 | 6 | 0.846927  | 8.657016  | -3.694184 |
| 6 | 1.093718  | 6.976003  | -1.924828 | 6 | 1.202763  | 7.020292  | -1.905499 |
| 7 | 2.100149  | 7.678196  | -1.366800 | 7 | 2.207214  | 7.726731  | -1.331221 |
| 1 | 0.857508  | 6.047147  | -1.423838 | 1 | 0.964794  | 6.085264  | -1.414657 |
| 6 | 1.848350  | 9.350225  | -3.103700 | 6 | 1.974313  | 9.384836  | -3.081383 |
| 8 | 0.123000  | 9.076287  | -4.708162 | 8 | 0.298471  | 9.076949  | -4.734114 |
| 6 | 2.532131  | 8.874338  | -1.964117 | 6 | 2.639089  | 8.920170  | -1.924239 |
| 6 | 2.798569  | 7.136483  | -0.206939 | 6 | 2.899894  | 7.181777  | -0.171931 |

|                                          |           |           |           |   |           |           |           |
|------------------------------------------|-----------|-----------|-----------|---|-----------|-----------|-----------|
| 6                                        | 2.018344  | 6.481563  | 0.901440  | 6 | 2.114364  | 6.517912  | 0.927683  |
| 6                                        | 2.674052  | 7.820599  | 1.131774  | 6 | 2.765473  | 7.856805  | 1.171175  |
| 1                                        | 3.762395  | 6.704255  | -0.465317 | 1 | 3.867693  | 6.753339  | -0.423356 |
| 1                                        | 2.020347  | 8.686392  | 1.188302  | 1 | 2.109964  | 8.721212  | 1.228706  |
| 1                                        | 3.566928  | 7.878179  | 1.747670  | 1 | 3.653634  | 7.911759  | 1.794244  |
| 1                                        | 2.456320  | 5.593437  | 1.346853  | 1 | 2.551083  | 5.628410  | 1.371759  |
| 1                                        | 0.934376  | 6.466362  | 0.837040  | 1 | 1.031057  | 6.500300  | 0.854233  |
| 6                                        | 2.288543  | 10.554597 | -3.685894 | 6 | 2.418069  | 10.589433 | -3.662499 |
| 6                                        | 3.358332  | 11.228451 | -3.158030 | 6 | 3.469842  | 11.276358 | -3.116836 |
| 6                                        | 4.092513  | 10.762616 | -2.035285 | 6 | 4.184171  | 10.823501 | -1.976125 |
| 6                                        | 3.643341  | 9.569313  | -1.454273 | 6 | 3.736195  | 9.629810  | -1.398265 |
| 1                                        | 1.759688  | 10.954351 | -4.544255 | 1 | 1.903655  | 10.978420 | -4.534583 |
| 1                                        | 4.173340  | 9.164783  | -0.604764 | 1 | 4.253363  | 9.235219  | -0.536107 |
| 9                                        | 3.709151  | 12.422493 | -3.718617 | 9 | 3.822679  | 12.471624 | -3.677005 |
| 7                                        | 5.161469  | 11.506317 | -1.525028 | 7 | 5.235252  | 11.584025 | -1.447984 |
| 6                                        | 6.278348  | 11.806558 | -2.444922 | 6 | 6.372537  | 11.874650 | -2.345032 |
| 6                                        | 5.653519  | 11.167624 | -0.186292 | 6 | 5.698605  | 11.260710 | -0.095701 |
| 6                                        | 7.127660  | 12.954561 | -1.906794 | 6 | 7.205855  | 13.032176 | -1.802240 |
| 1                                        | 5.888043  | 12.082591 | -3.423565 | 1 | 6.004161  | 12.137352 | -3.335948 |
| 1                                        | 6.905477  | 10.907202 | -2.564673 | 1 | 7.005203  | 10.975843 | -2.439295 |
| 6                                        | 6.498071  | 12.312587 | 0.377407  | 6 | 6.525362  | 12.415036 | 0.475032  |
| 1                                        | 6.254548  | 10.242247 | -0.202903 | 1 | 6.304395  | 10.338081 | -0.088890 |
| 1                                        | 4.800661  | 11.013045 | 0.479945  | 1 | 4.831649  | 11.108071 | 0.552693  |
| 7                                        | 7.577558  | 12.661844 | -0.546891 | 7 | 7.624578  | 12.758956 | -0.428178 |
| 1                                        | 6.921909  | 12.010757 | 1.333370  | 1 | 6.928731  | 12.125529 | 1.443609  |
| 1                                        | 5.857263  | 13.191799 | 0.542002  | 1 | 5.877474  | 13.293304 | 0.615387  |
| 1                                        | 6.538040  | 13.883866 | -1.909501 | 1 | 6.613578  | 13.959380 | -1.830940 |
| 1                                        | 8.001871  | 13.097625 | -2.541911 | 1 | 8.094402  | 13.170180 | -2.418330 |
| 6                                        | 8.838444  | 13.027874 | -0.159643 | 6 | 8.872625  | 13.140211 | -0.015262 |
| 8                                        | 9.689227  | 13.461306 | -0.938156 | 8 | 9.739160  | 13.569859 | -0.778444 |
| 8                                        | 9.027120  | 12.835989 | 1.164063  | 8 | 9.030370  | 12.967827 | 1.315246  |
| 6                                        | 10.327710 | 13.092518 | 1.826092  | 6 | 10.312147 | 13.244406 | 2.005128  |
| 6                                        | 10.033919 | 12.714504 | 3.280708  | 6 | 9.984879  | 12.886621 | 3.457719  |
| 6                                        | 10.690399 | 14.576886 | 1.718997  | 6 | 10.667138 | 14.729573 | 1.883960  |
| 6                                        | 11.407499 | 12.177687 | 1.240108  | 6 | 11.412756 | 12.328858 | 1.460425  |
| 1                                        | 11.086705 | 11.130521 | 1.282543  | 1 | 11.099093 | 11.279961 | 1.512262  |
| 1                                        | 12.323725 | 12.275540 | 1.833555  | 1 | 12.313552 | 12.443763 | 2.074129  |
| 1                                        | 11.635319 | 12.437357 | 0.204464  | 1 | 11.663670 | 12.573574 | 0.426450  |
| 1                                        | 9.870339  | 15.199288 | 2.094981  | 1 | 9.833164  | 15.351778 | 2.228364  |
| 1                                        | 10.909257 | 14.863214 | 0.688595  | 1 | 10.911068 | 15.001166 | 0.855206  |
| 1                                        | 11.576236 | 14.776389 | 2.332788  | 1 | 11.535093 | 14.945235 | 2.517497  |
| 1                                        | 9.230488  | 13.336759 | 3.689628  | 1 | 9.167461  | 13.509460 | 3.836953  |
| 1                                        | 10.931022 | 12.863940 | 3.890768  | 1 | 10.865572 | 13.051420 | 4.087419  |
| 1                                        | 9.735121  | 11.663395 | 3.357035  | 1 | 9.691068  | 11.834775 | 3.542799  |
| 8                                        | 2.129652  | 3.906368  | -2.903001 | 8 | 2.086907  | 3.979038  | -3.561143 |
| 1                                        | 2.085302  | 2.937097  | -2.901496 | 1 | 1.920688  | 3.177416  | -4.081591 |
| 1                                        | 1.208307  | 4.195475  | -3.038318 | 1 | 1.212284  | 4.422675  | -3.495092 |
| 8                                        | -4.316826 | 6.383846  | -5.171859 | 8 | -3.909782 | 6.412161  | -5.441908 |
| 1                                        | -4.617466 | 7.236636  | -5.522317 | 1 | -4.069229 | 7.219887  | -5.953997 |
| 1                                        | -3.428360 | 6.559239  | -4.800555 | 1 | -3.121646 | 6.611570  | -4.885177 |
| 9                                        | 0.587151  | -0.408181 | -2.013145 | 9 | 0.451686  | -0.500797 | -2.109945 |
| 9                                        | -1.530627 | -1.042914 | -2.613735 | 9 | -1.689181 | -1.132656 | -2.630845 |
| Products T <sub>1</sub> (explicit water) |           |           |           |   |           |           |           |
| 6                                        | -0.568322 | -4.350627 | 6.192108  |   |           |           |           |
| 6                                        | -1.647034 | -3.482659 | 6.547560  |   |           |           |           |
| 6                                        | -2.468747 | -2.949158 | 5.580103  |   |           |           |           |
| 6                                        | -0.384779 | -4.634985 | 4.800319  |   |           |           |           |
| 6                                        | -1.216055 | -4.093763 | 3.847722  |   |           |           |           |

|   |           |           |           |
|---|-----------|-----------|-----------|
| 6 | -2.294277 | -3.227988 | 4.194347  |
| 1 | -1.829799 | -3.234168 | 7.585453  |
| 1 | -3.280195 | -2.292246 | 5.883626  |
| 1 | -1.033338 | -4.342221 | 2.807022  |
| 6 | -3.186457 | -2.641479 | 3.250204  |
| 7 | 0.250191  | -4.884961 | 7.134017  |
| 1 | 0.418368  | -5.287061 | 4.480513  |
| 6 | 0.042947  | -4.590383 | 8.553498  |
| 6 | 1.352915  | -5.769561 | 6.751024  |
| 1 | 2.060311  | -5.254835 | 6.090762  |
| 1 | 0.981326  | -6.666483 | 6.242067  |
| 1 | 1.885148  | -6.079766 | 7.648958  |
| 1 | -0.946614 | -4.925728 | 8.885104  |
| 1 | 0.137553  | -3.516394 | 8.751337  |
| 1 | 0.797346  | -5.115283 | 9.137533  |
| 6 | -3.165148 | -2.809823 | 1.876063  |
| 1 | -3.956344 | -1.999880 | 3.674398  |
| 6 | -4.083625 | -2.196077 | 0.996995  |
| 1 | -2.408609 | -3.445411 | 1.430716  |
| 6 | -5.169899 | -1.323403 | 1.287630  |
| 6 | -5.782836 | -0.960588 | 0.103951  |
| 7 | -4.048621 | -2.367196 | -0.380137 |
| 6 | -5.053843 | -1.627666 | -0.945099 |
| 1 | -5.470781 | -1.000248 | 2.275479  |
| 6 | -6.983519 | -0.063517 | 0.018999  |
| 1 | -7.335287 | 0.170847  | 1.028153  |
| 1 | -7.813463 | -0.532996 | -0.522156 |
| 1 | -6.757835 | 0.888014  | -0.478111 |
| 5 | -3.043566 | -3.261839 | -1.135968 |
| 7 | -3.417992 | -3.237857 | -2.632837 |
| 6 | -5.242484 | -1.607809 | -2.390781 |
| 6 | -4.421882 | -2.499510 | -3.201584 |
| 6 | -6.144587 | -0.755811 | -2.972193 |
| 6 | -2.790083 | -3.981306 | -3.622860 |
| 6 | -4.461626 | -2.783515 | -4.613900 |
| 6 | -3.450574 | -3.694725 | -4.850638 |
| 6 | -5.390872 | -2.263367 | -5.671971 |
| 6 | -1.697805 | -4.839011 | -3.369578 |
| 1 | -3.205333 | -4.125597 | -5.812335 |
| 1 | -6.444019 | -2.425434 | -5.413638 |
| 1 | -5.196672 | -2.782507 | -6.615269 |
| 1 | -5.254262 | -1.190325 | -5.854706 |
| 6 | -1.056160 | -5.577528 | -4.349351 |
| 1 | -1.357331 | -4.909603 | -2.343129 |
| 6 | 0.044895  | -6.463397 | -4.163801 |
| 1 | -1.413821 | -5.487809 | -5.373289 |
| 6 | 0.658898  | -6.726221 | -2.904293 |
| 6 | 0.585035  | -7.145254 | -5.291574 |
| 6 | 1.718071  | -7.594636 | -2.780265 |
| 6 | 2.254577  | -8.276928 | -3.919649 |
| 6 | 1.645251  | -8.017401 | -5.186385 |
| 1 | 0.290960  | -6.235552 | -2.008765 |
| 1 | 2.145784  | -7.757249 | -1.798877 |
| 7 | 3.299175  | -9.135438 | -3.799172 |
| 1 | 0.143419  | -6.970656 | -6.269569 |
| 1 | 2.011840  | -8.506984 | -6.079860 |
| 6 | 3.904658  | -9.397136 | -2.491426 |
| 6 | 3.834691  | -9.825559 | -4.974616 |
| 1 | 4.195177  | -9.109197 | -5.721638 |



|   |           |            |           |
|---|-----------|------------|-----------|
| 1 | 3.074609  | -10.466676 | -5.436444 |
| 1 | 4.671531  | -10.450642 | -4.666986 |
| 1 | 3.172603  | -9.822810  | -1.795463 |
| 1 | 4.315654  | -8.479132  | -2.055859 |
| 1 | 4.716731  | -10.112065 | -2.614902 |
| 8 | -3.507464 | 2.824693   | -3.350719 |
| 1 | -6.741967 | -0.071933  | -2.389746 |
| 1 | -6.279730 | -0.709290  | -4.041529 |
| 6 | -3.476513 | 3.922120   | -2.713049 |
| 6 | -2.197178 | 4.261927   | -1.970339 |
| 8 | -4.443288 | 4.730871   | -2.613775 |
| 6 | -1.577115 | 5.575062   | -2.008141 |
| 6 | -1.614139 | 3.259105   | -1.236842 |
| 7 | -0.508550 | 3.400298   | -0.454808 |
| 1 | -2.042191 | 2.264346   | -1.240772 |
| 6 | -0.353465 | 5.698896   | -1.193368 |
| 8 | -1.988554 | 6.535988   | -2.696519 |
| 6 | 0.166276  | 4.623611   | -0.436508 |
| 6 | 0.027878  | 2.245667   | 0.249001  |
| 6 | -0.906244 | 1.295339   | 0.949777  |
| 6 | -0.007255 | 2.198126   | 1.757535  |
| 1 | 0.898058  | 1.816196   | -0.243543 |
| 1 | -0.477001 | 3.033253   | 2.269548  |
| 1 | 0.855083  | 1.774812   | 2.264947  |
| 1 | -0.670677 | 0.237549   | 0.882067  |
| 1 | -1.968219 | 1.521837   | 0.953080  |
| 6 | 0.337429  | 6.927458   | -1.160348 |
| 6 | 1.481592  | 7.061101   | -0.419822 |
| 6 | 2.052518  | 5.994901   | 0.324183  |
| 6 | 1.362399  | 4.778820   | 0.294037  |
| 1 | -0.059856 | 7.772514   | -1.712291 |
| 1 | 1.762011  | 3.932472   | 0.833023  |
| 9 | 2.081582  | 8.288965   | -0.367853 |
| 7 | 3.213275  | 6.201124   | 1.084559  |
| 6 | 4.417666  | 6.647847   | 0.355024  |
| 6 | 3.551199  | 5.191870   | 2.091875  |
| 6 | 5.453257  | 7.217731   | 1.320501  |
| 1 | 4.146880  | 7.416604   | -0.368001 |
| 1 | 4.853727  | 5.796016   | -0.194235 |
| 6 | 4.577433  | 5.747834   | 3.081356  |
| 1 | 3.953120  | 4.275946   | 1.624716  |
| 1 | 2.648288  | 4.925905   | 2.648142  |
| 7 | 5.756338  | 6.249868   | 2.373780  |
| 1 | 4.876171  | 4.961381   | 3.771919  |
| 1 | 4.121507  | 6.565444   | 3.659716  |
| 1 | 5.067777  | 8.145054   | 1.770896  |
| 1 | 6.372940  | 7.450146   | 0.783708  |
| 6 | 7.040248  | 6.134035   | 2.833440  |
| 8 | 8.004144  | 6.691091   | 2.305488  |
| 8 | 7.110554  | 5.325581   | 3.913534  |
| 6 | 8.394441  | 4.989259   | 4.571851  |
| 6 | 7.947227  | 4.057736   | 5.702109  |
| 6 | 9.041918  | 6.254898   | 5.142343  |
| 6 | 9.311237  | 4.247782   | 3.594173  |
| 1 | 8.794309  | 3.381275   | 3.166132  |
| 1 | 10.193576 | 3.883980   | 4.133069  |
| 1 | 9.643446  | 4.899025   | 2.783393  |
| 1 | 8.336045  | 6.787181   | 5.790167  |
| 1 | 9.373177  | 6.928589   | 4.349787  |

|   |           |           |           |
|---|-----------|-----------|-----------|
| 1 | 9.911286  | 5.973306  | 5.747416  |
| 1 | 7.256701  | 4.571866  | 6.379442  |
| 1 | 8.818305  | 3.730641  | 6.279642  |
| 1 | 7.446213  | 3.170494  | 5.299931  |
| 8 | -1.412942 | 1.315842  | -4.251775 |
| 1 | -1.722117 | 1.000132  | -5.114441 |
| 1 | -2.149649 | 1.884755  | -3.903220 |
| 8 | -6.786465 | 4.266366  | -3.928494 |
| 1 | -7.253729 | 5.111032  | -3.837753 |
| 1 | -5.912917 | 4.399605  | -3.466073 |
| 9 | -1.725163 | -2.787480 | -0.950271 |
| 9 | -3.113157 | -4.585566 | -0.643245 |

| Compound 5                          |           |           |           |                                     |           |           |           |
|-------------------------------------|-----------|-----------|-----------|-------------------------------------|-----------|-----------|-----------|
| Min S <sub>0</sub> (implicit water) |           |           |           | Min S <sub>1</sub> (implicit water) |           |           |           |
| 6                                   | -2.477169 | 0.095276  | 0.447544  | 6                                   | -2.633277 | -0.018345 | 0.382904  |
| 6                                   | -2.446630 | 1.215920  | -0.487608 | 6                                   | -2.567215 | 1.116075  | -0.496310 |
| 6                                   | -3.179493 | 2.409007  | -0.214966 | 6                                   | -3.298085 | 2.310400  | -0.211701 |
| 6                                   | -2.938891 | 3.290466  | -1.250360 | 6                                   | -3.004034 | 3.230164  | -1.188079 |
| 7                                   | -1.785791 | 1.360526  | -1.679311 | 7                                   | -1.845193 | 1.313745  | -1.652664 |
| 6                                   | -2.077413 | 2.637063  | -2.171456 | 6                                   | -2.111255 | 2.601895  | -2.101645 |
| 5                                   | -0.856458 | 0.361010  | -2.424966 | 5                                   | -0.903807 | 0.342726  | -2.386497 |
| 7                                   | -0.509733 | 0.927165  | -3.831378 | 7                                   | -0.486468 | 0.952518  | -3.736108 |
| 9                                   | -1.496423 | -0.885136 | -2.553337 | 9                                   | -1.544273 | -0.893564 | -2.589803 |
| 9                                   | 0.345310  | 0.206336  | -1.681451 | 9                                   | 0.256087  | 0.124186  | -1.592511 |
| 6                                   | -1.607573 | 3.069672  | -3.416273 | 6                                   | -1.590138 | 3.091539  | -3.310369 |
| 6                                   | -0.852289 | 2.222096  | -4.234577 | 6                                   | -0.799618 | 2.252867  | -4.112702 |
| 6                                   | -1.923680 | 4.467632  | -3.883787 | 6                                   | -1.895702 | 4.481678  | -3.754240 |
| 6                                   | 0.155060  | 0.332171  | -4.871739 | 6                                   | 0.220257  | 0.376554  | -4.768571 |
| 6                                   | -0.379761 | 2.422437  | -5.558991 | 6                                   | -0.253805 | 2.500117  | -5.403945 |
| 6                                   | 0.231992  | 1.250932  | -5.960001 | 6                                   | 0.357968  | 1.341096  | -5.813968 |
| 6                                   | 0.744767  | -0.998969 | -4.980844 | 6                                   | 0.806625  | -0.929748 | -4.886877 |
| 8                                   | -0.878443 | 5.335248  | -3.375710 | 8                                   | -0.854961 | 5.360189  | -3.255323 |
| 1                                   | -2.887012 | 4.813587  | -3.505825 | 1                                   | -2.854334 | 4.832098  | -3.369856 |
| 1                                   | -1.945276 | 4.536606  | -4.971913 | 1                                   | -1.923125 | 4.565805  | -4.841549 |
| 6                                   | -0.972920 | 6.652127  | -3.720234 | 6                                   | -0.961304 | 6.664119  | -3.589214 |
| 6                                   | 0.146924  | 7.450062  | -3.178448 | 6                                   | 0.159315  | 7.469186  | -3.065113 |
| 8                                   | -1.895953 | 7.068395  | -4.402228 | 8                                   | -1.892039 | 7.079459  | -4.253424 |
| 6                                   | 0.217268  | 8.899411  | -3.351703 | 6                                   | 0.212635  | 8.913770  | -3.224971 |
| 6                                   | 1.154834  | 6.794946  | -2.493582 | 6                                   | 1.181738  | 6.820885  | -2.411708 |
| 7                                   | 2.230328  | 7.391502  | -1.944158 | 7                                   | 2.260378  | 7.418262  | -1.883987 |
| 1                                   | 1.115045  | 5.722381  | -2.365568 | 1                                   | 1.150254  | 5.746958  | -2.292617 |
| 6                                   | 1.433997  | 9.517976  | -2.785676 | 6                                   | 1.434024  | 9.537034  | -2.682952 |
| 8                                   | -0.641787 | 9.595605  | -3.923184 | 8                                   | -0.659980 | 9.605920  | -3.765334 |
| 6                                   | 2.419545  | 8.774816  | -2.102581 | 6                                   | 2.433163  | 8.799178  | -2.034699 |
| 6                                   | 3.246325  | 6.577750  | -1.286382 | 6                                   | 3.294835  | 6.612227  | -1.260941 |
| 6                                   | 2.833522  | 5.439648  | -0.391969 | 6                                   | 2.906155  | 5.482072  | -0.356669 |
| 6                                   | 3.443526  | 6.683500  | 0.205603  | 6                                   | 3.528062  | 6.722517  | 0.218035  |
| 1                                   | 4.130689  | 6.436262  | -1.903376 | 1                                   | 4.161030  | 6.470917  | -1.901407 |
| 1                                   | 2.776821  | 7.347047  | 0.749078  | 1                                   | 2.876049  | 7.389804  | 0.772842  |
| 1                                   | 4.463459  | 6.651471  | 0.577878  | 1                                   | 4.555538  | 6.690456  | 0.565775  |
| 1                                   | 3.428680  | 4.533322  | -0.449942 | 1                                   | 3.498841  | 4.576132  | -0.423695 |
| 1                                   | 1.775072  | 5.273566  | -0.215055 | 1                                   | 1.852384  | 5.318223  | -0.156711 |
| 6                                   | 1.630999  | 10.905041 | -2.926504 | 6                                   | 1.611896  | 10.922418 | -2.817578 |
| 6                                   | 2.757646  | 11.499941 | -2.421697 | 6                                   | 2.739910  | 11.518776 | -2.335567 |
| 6                                   | 3.786988  | 10.779089 | -1.761135 | 6                                   | 3.783383  | 10.801302 | -1.707618 |
| 6                                   | 3.580270  | 9.401067  | -1.614752 | 6                                   | 3.596583  | 9.429025  | -1.568212 |

|   |           |           |           |   |           |           |           |
|---|-----------|-----------|-----------|---|-----------|-----------|-----------|
| 1 | 0.871623  | 11.501639 | -3.420059 | 1 | 0.836430  | 11.514419 | -3.289716 |
| 1 | 4.337680  | 8.803730  | -1.129326 | 1 | 4.368876  | 8.834905  | -1.104003 |
| 9 | 2.873939  | 12.855952 | -2.527888 | 9 | 2.850924  | 12.868786 | -2.432747 |
| 7 | 4.903504  | 11.443862 | -1.242467 | 7 | 4.904413  | 11.474827 | -1.216844 |
| 6 | 5.721594  | 12.231383 | -2.188320 | 6 | 5.691977  | 12.238508 | -2.195555 |
| 6 | 5.746378  | 10.718444 | -0.287102 | 6 | 5.771079  | 10.750527 | -0.293020 |
| 6 | 6.614212  | 13.216974 | -1.439147 | 6 | 6.612984  | 13.221003 | -1.491008 |
| 1 | 5.073093  | 12.784602 | -2.866457 | 1 | 5.025686  | 12.788880 | -2.857488 |
| 1 | 6.346702  | 11.549031 | -2.788541 | 1 | 6.291180  | 11.545221 | -2.807433 |
| 6 | 6.641474  | 11.692103 | 0.483094  | 6 | 6.692799  | 11.718862 | 0.437515  |
| 1 | 6.374756  | 9.967837  | -0.796686 | 1 | 6.378088  | 9.996941  | -0.821385 |
| 1 | 5.106706  | 10.200796 | 0.432641  | 1 | 5.154858  | 10.237305 | 0.448612  |
| 7 | 7.420419  | 12.517089 | -0.440715 | 7 | 7.441386  | 12.526674 | -0.516320 |
| 1 | 7.316250  | 11.129797 | 1.125813  | 1 | 7.385642  | 11.159719 | 1.061938  |
| 1 | 6.016465  | 12.340365 | 1.115391  | 1 | 6.093878  | 12.376108 | 1.083016  |
| 1 | 5.991534  | 13.977301 | -0.943853 | 1 | 6.013706  | 13.990300 | -0.984119 |
| 1 | 7.281922  | 13.718806 | -2.139352 | 1 | 7.261819  | 13.709687 | -2.216207 |
| 6 | 8.721357  | 12.890673 | -0.238415 | 6 | 8.743763  | 12.890125 | -0.359521 |
| 8 | 9.316240  | 13.696163 | -0.956169 | 8 | 9.319633  | 13.682599 | -1.098882 |
| 8 | 9.261597  | 12.255790 | 0.824526  | 8 | 9.313465  | 12.266812 | 0.683831  |
| 6 | 10.678916 | 12.433825 | 1.218572  | 6 | 10.730295 | 12.447182 | 1.027038  |
| 6 | 10.796663 | 11.514506 | 2.437634  | 6 | 10.890868 | 11.546472 | 2.246288  |
| 6 | 10.937354 | 13.890293 | 1.616743  | 6 | 11.000948 | 13.901421 | 1.398430  |
| 6 | 11.602259 | 11.957082 | 0.093152  | 6 | 11.613108 | 11.960679 | -0.117373 |
| 1 | 11.349067 | 10.932276 | -0.201695 | 1 | 11.348408 | 10.934799 | -0.393089 |
| 1 | 12.638338 | 11.960388 | 0.450583  | 1 | 12.658583 | 11.965488 | 0.206601  |
| 1 | 11.535289 | 12.605207 | -0.782907 | 1 | 11.518110 | 12.600189 | -0.995610 |
| 1 | 10.220650 | 14.210736 | 2.381533  | 1 | 10.308472 | 14.229764 | 2.180209  |
| 1 | 10.863053 | 14.560407 | 0.758228  | 1 | 10.899882 | 14.560134 | 0.535371  |
| 1 | 11.944858 | 13.974673 | 2.039968  | 1 | 12.019658 | 13.989237 | 1.789073  |
| 1 | 10.103845 | 11.825272 | 3.227182  | 1 | 10.224686 | 11.865965 | 3.053295  |
| 1 | 11.815759 | 11.556243 | 2.836439  | 1 | 11.921466 | 11.593368 | 2.609615  |
| 1 | 10.573955 | 10.476961 | 2.165898  | 1 | 10.659755 | 10.507382 | 1.993274  |
| 1 | -3.340495 | 4.289602  | -1.355760 | 1 | -3.384571 | 4.239094  | -1.266669 |
| 1 | -0.495652 | 3.323881  | -6.145945 | 1 | -0.325870 | 3.427900  | -5.954437 |
| 6 | -4.019347 | 2.537027  | 1.019654  | 6 | -4.160740 | 2.414077  | 1.000780  |
| 6 | -4.608257 | 1.159849  | 1.363103  | 6 | -4.754814 | 1.039291  | 1.310043  |
| 1 | -4.818078 | 3.272307  | 0.875775  | 1 | -4.952431 | 3.154530  | 0.855435  |
| 1 | -3.405462 | 2.892299  | 1.861447  | 1 | -3.559062 | 2.754213  | 1.855717  |
| 6 | -3.540165 | 0.083756  | 1.393874  | 6 | -3.702470 | -0.041988 | 1.326220  |
| 1 | -5.358043 | 0.896384  | 0.601357  | 1 | -5.494492 | 0.793621  | 0.534803  |
| 1 | -5.132356 | 1.193128  | 2.323708  | 1 | -5.289233 | 1.054267  | 2.263675  |
| 6 | -1.516110 | -0.938443 | 0.514013  | 6 | -1.705216 | -1.087374 | 0.411375  |
| 6 | -1.606631 | -1.951071 | 1.455732  | 6 | -1.826666 | -2.120354 | 1.312771  |
| 6 | -2.669902 | -1.966268 | 2.374077  | 6 | -2.886991 | -2.134743 | 2.230766  |
| 6 | -3.627318 | -0.943225 | 2.338090  | 6 | -3.815609 | -1.089528 | 2.229909  |
| 8 | -2.679634 | -2.998656 | 3.260418  | 8 | -2.926582 | -3.186217 | 3.076205  |
| 6 | -3.731904 | -3.071227 | 4.228784  | 6 | -3.973257 | -3.260743 | 4.040062  |
| 1 | -3.530534 | -3.969682 | 4.812802  | 1 | -3.797065 | -4.180155 | 4.596451  |
| 1 | -4.708826 | -3.160054 | 3.740475  | 1 | -4.951157 | -3.308074 | 3.551142  |
| 1 | -3.721450 | -2.194383 | 4.885902  | 1 | -3.937371 | -2.405362 | 4.721715  |
| 1 | -4.450975 | -0.931664 | 3.043428  | 1 | -4.642012 | -1.084674 | 2.930819  |
| 1 | -0.675846 | -0.937594 | -0.165578 | 1 | -0.865918 | -1.086451 | -0.267461 |
| 1 | -0.856544 | -2.735215 | 1.501948  | 1 | -1.103256 | -2.929082 | 1.334271  |
| 6 | 0.890627  | 0.872173  | -7.252072 | 6 | 1.103892  | 1.021255  | -7.065866 |
| 6 | 1.028795  | -1.464638 | -6.302360 | 6 | 1.210646  | -1.340263 | -6.198052 |
| 6 | 1.098609  | -1.824308 | -3.897878 | 6 | 1.053201  | -1.814226 | -3.816996 |
| 6 | 1.692481  | -3.071561 | -4.084342 | 6 | 1.661476  | -3.043514 | -4.007436 |
| 6 | 1.951587  | -3.524479 | -5.385319 | 6 | 2.046750  | -3.429983 | -5.295378 |

|                                     |           |           |           |                                    |           |           |           |
|-------------------------------------|-----------|-----------|-----------|------------------------------------|-----------|-----------|-----------|
| 6                                   | 1.619038  | -2.709635 | -6.480632 | 6                                  | 1.816326  | -2.566687 | -6.375994 |
| 8                                   | 2.525721  | -4.720681 | -5.687950 | 8                                  | 2.646583  | -4.601936 | -5.593915 |
| 6                                   | 2.895578  | -5.598200 | -4.618472 | 6                                  | 2.911249  | -5.527683 | -4.543543 |
| 1                                   | 3.324873  | -6.478679 | -5.097361 | 1                                  | 3.385853  | -6.385198 | -5.018273 |
| 1                                   | 2.018870  | -5.889324 | -4.029142 | 1                                  | 1.982381  | -5.842617 | -4.058302 |
| 1                                   | 3.643472  | -5.130540 | -3.968348 | 1                                  | 3.590729  | -5.093814 | -3.803544 |
| 1                                   | 0.931190  | -1.485384 | -2.885396 | 1                                  | 0.789169  | -1.524119 | -2.811208 |
| 1                                   | 1.954214  | -3.666811 | -3.217301 | 1                                  | 1.840084  | -3.683344 | -3.152118 |
| 1                                   | 1.834461  | -3.074098 | -7.481699 | 1                                  | 2.121362  | -2.889069 | -7.367232 |
| 6                                   | 0.655151  | -0.624812 | -7.507981 | 6                                  | 0.922330  | -0.462160 | -7.390740 |
| 1                                   | -0.410839 | -0.779939 | -7.734231 | 1                                  | -0.118356 | -0.628379 | -7.702923 |
| 1                                   | 1.217122  | -0.960639 | -8.385395 | 1                                  | 1.556291  | -0.755692 | -8.231627 |
| 1                                   | 1.972414  | 1.068499  | -7.199213 | 1                                  | 2.172536  | 1.238150  | -6.926143 |
| 1                                   | 0.498841  | 1.471235  | -8.080930 | 1                                  | 0.759457  | 1.645215  | -7.895487 |
| Min T <sub>1</sub> (implicit water) |           |           |           | TS T <sub>1</sub> (implicit water) |           |           |           |
| 6                                   | -2.824750 | -0.067727 | 0.372666  | 6                                  | -2.943735 | -0.237029 | 0.362506  |
| 6                                   | -2.721684 | 1.072777  | -0.502227 | 6                                  | -3.078928 | 0.885215  | -0.527012 |
| 6                                   | -3.468819 | 2.270066  | -0.249691 | 6                                  | -4.094884 | 1.882063  | -0.314380 |
| 6                                   | -3.133634 | 3.192024  | -1.214485 | 6                                  | -3.947732 | 2.840853  | -1.288727 |
| 7                                   | -1.940768 | 1.280072  | -1.641374 | 7                                  | -2.342372 | 1.249938  | -1.643245 |
| 6                                   | -2.193679 | 2.564162  | -2.094874 | 6                                  | -2.866498 | 2.433802  | -2.118829 |
| 5                                   | -0.962474 | 0.310044  | -2.343282 | 5                                  | -1.148754 | 0.506722  | -2.306849 |
| 7                                   | -0.480264 | 0.937772  | -3.671204 | 7                                  | -0.802890 | 1.193788  | -3.657937 |
| 9                                   | -1.597135 | -0.927687 | -2.590932 | 9                                  | -1.489885 | -0.836219 | -2.530616 |
| 9                                   | 0.164074  | 0.084126  | -1.495039 | 9                                  | -0.023694 | 0.583064  | -1.449051 |
| 6                                   | -1.619311 | 3.071291  | -3.281059 | 6                                  | -2.380773 | 3.057931  | -3.319605 |
| 6                                   | -0.784440 | 2.233932  | -4.052229 | 6                                  | -1.369850 | 2.376964  | -4.081854 |
| 6                                   | -1.913004 | 4.463287  | -3.730487 | 6                                  | -2.873630 | 4.285370  | -3.735447 |
| 6                                   | 0.291625  | 0.368898  | -4.686704 | 6                                  | 0.070154  | 0.770818  | -4.648201 |
| 6                                   | -0.175105 | 2.501341  | -5.321281 | 6                                  | -0.844600 | 2.725235  | -5.357443 |
| 6                                   | 0.469563  | 1.351627  | -5.715703 | 6                                  | 0.031732  | 1.730090  | -5.720924 |
| 6                                   | 0.894496  | -0.935851 | -4.791387 | 6                                  | 0.937438  | -0.374762 | -4.709957 |
| 8                                   | -0.886911 | 5.361672  | -3.186170 | 8                                  | -1.569210 | 5.871954  | -2.784426 |
| 1                                   | -2.884856 | 4.814769  | -3.379902 | 1                                  | -3.704808 | 4.750565  | -3.225018 |
| 1                                   | -1.897066 | 4.559130  | -4.818100 | 1                                  | -2.596670 | 4.718502  | -4.685626 |
| 6                                   | -0.987528 | 6.672633  | -3.523478 | 6                                  | -1.034119 | 6.674368  | -3.629822 |
| 6                                   | 0.140249  | 7.473706  | -2.992518 | 6                                  | 0.124723  | 7.494976  | -3.088504 |
| 8                                   | -1.914130 | 7.099773  | -4.197405 | 8                                  | -1.358135 | 6.800119  | -4.833214 |
| 6                                   | 0.126828  | 8.933988  | -3.003784 | 6                                  | 0.293905  | 8.909338  | -3.374102 |
| 6                                   | 1.239469  | 6.805741  | -2.486138 | 6                                  | 1.043521  | 6.849582  | -2.298908 |
| 7                                   | 2.341421  | 7.398206  | -1.983119 | 7                                  | 2.165955  | 7.417471  | -1.777957 |
| 1                                   | 1.259435  | 5.724845  | -2.477931 | 1                                  | 0.904453  | 5.805042  | -2.049983 |
| 6                                   | 1.367860  | 9.554930  | -2.496780 | 6                                  | 1.544108  | 9.493877  | -2.852323 |
| 8                                   | -0.822680 | 9.638815  | -3.394160 | 8                                  | -0.535799 | 9.613942  | -3.991350 |
| 6                                   | 2.451946  | 8.798181  | -2.003878 | 6                                  | 2.465089  | 8.748696  | -2.080571 |
| 6                                   | 3.459016  | 6.576295  | -1.534361 | 6                                  | 3.101790  | 6.598682  | -1.022872 |
| 6                                   | 3.199599  | 5.323597  | -0.741221 | 6                                  | 2.583023  | 5.613173  | -0.009367 |
| 6                                   | 3.814255  | 6.526325  | -0.068873 | 6                                  | 3.306268  | 6.854685  | 0.450618  |
| 1                                   | 4.276351  | 6.555524  | -2.251635 | 1                                  | 3.972838  | 6.303239  | -1.604540 |
| 1                                   | 3.181921  | 7.085553  | 0.614901  | 1                                  | 2.704888  | 7.636394  | 0.906165  |
| 1                                   | 4.869413  | 6.511987  | 0.188730  | 1                                  | 4.317404  | 6.768748  | 0.838423  |
| 1                                   | 3.825741  | 4.465545  | -0.966488 | 1                                  | 3.090234  | 4.654577  | 0.046516  |
| 1                                   | 2.175760  | 5.077497  | -0.475697 | 1                                  | 1.512625  | 5.568739  | 0.168291  |
| 6                                   | 1.487637  | 10.957980 | -2.500129 | 6                                  | 1.847762  | 10.843081 | -3.126122 |
| 6                                   | 2.634289  | 11.556905 | -2.048288 | 6                                  | 3.012866  | 11.399017 | -2.669019 |
| 6                                   | 3.758442  | 10.827462 | -1.579370 | 6                                  | 3.980364  | 10.671504 | -1.926606 |
| 6                                   | 3.629415  | 9.432527  | -1.568112 | 6                                  | 3.670380  | 9.336881  | -1.644930 |
| 1                                   | 0.654636  | 11.560858 | -2.844821 | 1                                  | 1.138487  | 11.442001 | -3.687246 |

|   |           |           |           |   |           |           |           |
|---|-----------|-----------|-----------|---|-----------|-----------|-----------|
| 1 | 4.459546  | 8.829429  | -1.231365 | 1 | 4.377422  | 8.737118  | -1.090808 |
| 9 | 2.679471  | 12.921083 | -2.014077 | 9 | 3.236395  | 12.726559 | -2.909742 |
| 7 | 4.893468  | 11.494746 | -1.105052 | 7 | 5.143880  | 11.304587 | -1.465255 |
| 6 | 5.571839  | 12.418959 | -2.037446 | 6 | 6.028648  | 11.902159 | -2.485990 |
| 6 | 5.863608  | 10.721269 | -0.324296 | 6 | 5.923009  | 10.622319 | -0.428572 |
| 6 | 6.493797  | 13.369862 | -1.279223 | 6 | 6.998531  | 12.891769 | -1.846710 |
| 1 | 4.831684  | 13.002405 | -2.583521 | 1 | 5.431190  | 12.424140 | -3.232666 |
| 1 | 6.159847  | 11.837336 | -2.767292 | 1 | 6.596217  | 11.104449 | -2.994830 |
| 6 | 6.791625  | 11.657497 | 0.453427  | 6 | 6.894259  | 11.598377 | 0.238921  |
| 1 | 6.467051  | 10.063432 | -0.973174 | 1 | 6.488840  | 9.771147  | -0.845794 |
| 1 | 5.326995  | 10.097210 | 0.395272  | 1 | 5.242436  | 10.240250 | 0.337087  |
| 7 | 7.430962  | 12.616074 | -0.448437 | 7 | 7.740527  | 12.250923 | -0.761591 |
| 1 | 7.555109  | 11.069729 | 0.959536  | 1 | 7.520486  | 11.057210 | 0.945825  |
| 1 | 6.209288  | 12.200844 | 1.212581  | 1 | 6.324069  | 12.360743 | 0.790787  |
| 1 | 5.893546  | 14.039389 | -0.644774 | 1 | 6.440200  | 13.755081 | -1.453744 |
| 1 | 7.061333  | 13.977277 | -1.984106 | 1 | 7.708642  | 13.249695 | -2.592191 |
| 6 | 8.728838  | 13.036256 | -0.339904 | 6 | 9.056624  | 12.572459 | -0.565814 |
| 8 | 9.208482  | 13.943708 | -1.021384 | 8 | 9.712350  | 13.259513 | -1.350583 |
| 8 | 9.406058  | 12.323495 | 0.586526  | 8 | 9.537503  | 12.028815 | 0.573528  |
| 6 | 10.851167 | 12.525047 | 0.843971  | 6 | 10.951924 | 12.178786 | 0.988454  |
| 6 | 11.135520 | 11.488222 | 1.934556  | 6 | 10.993418 | 11.387833 | 2.299111  |
| 6 | 11.102391 | 13.941708 | 1.369663  | 6 | 11.273201 | 13.655186 | 1.240461  |
| 6 | 11.659829 | 12.213835 | -0.419086 | 6 | 11.878202 | 11.543293 | -0.052923 |
| 1 | 11.412816 | 11.214747 | -0.795968 | 1 | 11.580733 | 10.506657 | -0.248335 |
| 1 | 12.728336 | 12.229590 | -0.175739 | 1 | 12.903318 | 11.534177 | 0.334733  |
| 1 | 11.472360 | 12.946693 | -1.206380 | 1 | 11.866927 | 12.098957 | -0.992628 |
| 1 | 10.462543 | 14.148137 | 2.235247  | 1 | 10.555547 | 14.087862 | 1.946884  |
| 1 | 10.913649 | 14.693959 | 0.601521  | 1 | 11.252570 | 14.233717 | 0.314932  |
| 1 | 12.146552 | 14.026119 | 1.692048  | 1 | 12.273472 | 13.736330 | 1.681055  |
| 1 | 10.526043 | 11.682186 | 2.823876  | 1 | 10.299161 | 11.812868 | 3.032120  |
| 1 | 12.191100 | 11.532936 | 2.222736  | 1 | 12.003812 | 11.421263 | 2.720218  |
| 1 | 10.917705 | 10.476378 | 1.575822  | 1 | 10.724110 | 10.339617 | 2.129772  |
| 1 | -3.510885 | 4.201108  | -1.308392 | 1 | -4.548193 | 3.730201  | -1.419805 |
| 1 | -0.228609 | 3.436029  | -5.862550 | 1 | -1.106769 | 3.603582  | -5.930604 |
| 6 | -4.390255 | 2.371044  | 0.924345  | 6 | -5.055571 | 1.775910  | 0.824629  |
| 6 | -4.997676 | 0.988496  | 1.207805  | 6 | -5.333257 | 0.292297  | 1.112582  |
| 1 | -5.176702 | 3.111163  | 0.743462  | 1 | -5.984685 | 2.310494  | 0.603446  |
| 1 | -3.828892 | 2.711905  | 1.807748  | 1 | -4.620520 | 2.247077  | 1.718762  |
| 6 | -3.940890 | -0.094317 | 1.270983  | 6 | -4.057058 | -0.514009 | 1.223102  |
| 1 | -5.704773 | 0.743813  | 0.400378  | 1 | -5.938895 | -0.119636 | 0.291475  |
| 1 | -5.574248 | 1.004299  | 2.138074  | 1 | -5.924472 | 0.182642  | 2.026575  |
| 6 | -1.893241 | -1.137582 | 0.444998  | 6 | -1.786939 | -1.053983 | 0.483641  |
| 6 | -2.052076 | -2.174652 | 1.344936  | 6 | -1.730683 | -2.089590 | 1.392227  |
| 6 | -3.155580 | -2.192254 | 2.219252  | 6 | -2.836307 | -2.361656 | 2.225752  |
| 6 | -4.090166 | -1.145510 | 2.173917  | 6 | -3.989798 | -1.564965 | 2.133358  |
| 8 | -3.226260 | -3.249216 | 3.067604  | 8 | -2.688568 | -3.395481 | 3.080613  |
| 6 | -4.317347 | -3.329374 | 3.993552  | 6 | -3.762437 | -3.735096 | 3.971766  |
| 1 | -4.155189 | -4.248982 | 4.556059  | 1 | -3.401830 | -4.587582 | 4.546836  |
| 1 | -5.275266 | -3.383519 | 3.464878  | 1 | -4.657912 | -4.018410 | 3.409190  |
| 1 | -4.313712 | -2.472744 | 4.676386  | 1 | -3.986000 | -2.900799 | 4.644443  |
| 1 | -4.947716 | -1.142782 | 2.837662  | 1 | -4.846708 | -1.760812 | 2.767790  |
| 1 | -1.023639 | -1.135360 | -0.195360 | 1 | -0.917132 | -0.848617 | -0.122415 |
| 1 | -1.325451 | -2.980129 | 1.397967  | 1 | -0.837594 | -2.699311 | 1.488172  |
| 6 | 1.276711  | 1.052652  | -6.939444 | 6 | 0.873371  | 1.558219  | -6.943685 |
| 6 | 1.365935  | -1.328214 | -6.092520 | 6 | 1.470331  | -0.711558 | -6.003611 |
| 6 | 1.100131  | -1.835338 | -3.718535 | 6 | 1.342347  | -1.155387 | -3.599752 |
| 6 | 1.732516  | -3.060924 | -3.895236 | 6 | 2.218331  | -2.221441 | -3.734396 |
| 6 | 2.186273  | -3.429461 | -5.171909 | 6 | 2.723302  | -2.546397 | -5.007327 |
| 6 | 1.996111  | -2.551006 | -6.255879 | 6 | 2.341516  | -1.779688 | -6.126139 |

|                                 |           |           |           |   |          |           |           |
|---------------------------------|-----------|-----------|-----------|---|----------|-----------|-----------|
| 8                               | 2.817612  | -4.595816 | -5.460393 | 8 | 3.577881 | -3.561268 | -5.255430 |
| 6                               | 3.048268  | -5.539746 | -4.406731 | 6 | 4.015577 | -4.394945 | -4.170763 |
| 1                               | 3.556532  | -6.382285 | -4.875992 | 1 | 4.681834 | -5.129800 | -4.621965 |
| 1                               | 2.101774  | -5.875674 | -3.969495 | 1 | 3.164772 | -4.901743 | -3.704099 |
| 1                               | 3.688270  | -5.108300 | -3.629364 | 1 | 4.561388 | -3.806919 | -3.425879 |
| 1                               | 0.785001  | -1.561756 | -2.722394 | 1 | 0.990725 | -0.904398 | -2.609926 |
| 1                               | 1.876048  | -3.709361 | -3.038726 | 1 | 2.511371 | -2.781190 | -2.854262 |
| 1                               | 2.350870  | -2.857132 | -7.236533 | 1 | 2.744987 | -2.050057 | -7.097906 |
| 6                               | 1.125078  | -0.435277 | -7.291458 | 6 | 1.040299 | 0.058225  | -7.233674 |
| 1                               | 0.101278  | -0.605722 | -7.657902 | 1 | 0.076581 | -0.343063 | -7.581099 |
| 1                               | 1.802486  | -0.710741 | -8.105826 | 1 | 1.759330 | -0.099945 | -8.042954 |
| 1                               | 2.337160  | 1.277338  | -6.747968 | 1 | 1.862031 | 2.011687  | -6.777342 |
| 1                               | 0.965257  | 1.684281  | -7.777928 | 1 | 0.427189 | 2.073666  | -7.799960 |
| Products $T_1$ (implicit water) |           |           |           |   |          |           |           |
| 6                               | -2.717295 | -1.299929 | 0.164760  |   |          |           |           |
| 6                               | -3.022477 | 0.055496  | -0.188282 |   |          |           |           |
| 6                               | -4.222493 | 0.697616  | 0.293979  |   |          |           |           |
| 6                               | -4.210570 | 1.992461  | -0.163399 |   |          |           |           |
| 7                               | -2.318029 | 0.970638  | -0.948907 |   |          |           |           |
| 6                               | -3.032466 | 2.149605  | -0.942738 |   |          |           |           |
| 5                               | -0.987665 | 0.765853  | -1.735558 |   |          |           |           |
| 7                               | -0.731992 | 2.007345  | -2.638878 |   |          |           |           |
| 9                               | -1.083199 | -0.385877 | -2.526623 |   |          |           |           |
| 9                               | 0.077059  | 0.641175  | -0.814131 |   |          |           |           |
| 6                               | -2.610641 | 3.304711  | -1.699632 |   |          |           |           |
| 6                               | -1.476007 | 3.166926  | -2.581218 |   |          |           |           |
| 6                               | -3.290641 | 4.498152  | -1.614692 |   |          |           |           |
| 6                               | 0.221538  | 2.181226  | -3.625316 |   |          |           |           |
| 6                               | -0.991357 | 4.106487  | -3.533459 |   |          |           |           |
| 6                               | 0.046635  | 3.496943  | -4.195513 |   |          |           |           |
| 6                               | 1.268683  | 1.312666  | -4.078688 |   |          |           |           |
| 8                               | -3.113745 | 8.950511  | -2.601058 |   |          |           |           |
| 1                               | -4.144569 | 4.606382  | -0.955878 |   |          |           |           |
| 1                               | -3.000060 | 5.366903  | -2.200135 |   |          |           |           |
| 6                               | -2.233475 | 8.162894  | -3.053464 |   |          |           |           |
| 6                               | -0.777163 | 8.582614  | -2.872908 |   |          |           |           |
| 8                               | -2.444395 | 7.040830  | -3.599597 |   |          |           |           |
| 6                               | 0.198613  | 8.543824  | -3.946734 |   |          |           |           |
| 6                               | -0.390970 | 9.013268  | -1.629827 |   |          |           |           |
| 7                               | 0.878707  | 9.372711  | -1.280030 |   |          |           |           |
| 1                               | -1.118540 | 9.088743  | -0.830913 |   |          |           |           |
| 6                               | 1.577673  | 8.871258  | -3.539520 |   |          |           |           |
| 8                               | -0.072875 | 8.276970  | -5.140416 |   |          |           |           |
| 6                               | 1.904320  | 9.262512  | -2.220089 |   |          |           |           |
| 6                               | 1.168422  | 9.735865  | 0.097730  |   |          |           |           |
| 6                               | 0.229018  | 10.647659 | 0.842361  |   |          |           |           |
| 6                               | 1.592343  | 11.145794 | 0.431133  |   |          |           |           |
| 1                               | 1.631239  | 8.929327  | 0.663352  |   |          |           |           |
| 1                               | 1.632010  | 11.858673 | -0.387661 |   |          |           |           |
| 1                               | 2.362779  | 11.271706 | 1.186691  |   |          |           |           |
| 1                               | 0.044350  | 10.415062 | 1.886956  |   |          |           |           |
| 1                               | -0.627742 | 11.051637 | 0.311206  |   |          |           |           |
| 6                               | 2.620916  | 8.792405  | -4.485162 |   |          |           |           |
| 6                               | 3.911541  | 9.067667  | -4.119945 |   |          |           |           |
| 6                               | 4.283668  | 9.423031  | -2.796407 |   |          |           |           |
| 6                               | 3.246069  | 9.515530  | -1.863800 |   |          |           |           |
| 1                               | 2.386539  | 8.528343  | -5.510828 |   |          |           |           |
| 1                               | 3.478180  | 9.775000  | -0.841213 |   |          |           |           |

|   |           |           |           |
|---|-----------|-----------|-----------|
| 9 | 4.881373  | 9.032157  | -5.084294 |
| 7 | 5.621911  | 9.716385  | -2.491210 |
| 6 | 6.608430  | 8.643393  | -2.729742 |
| 6 | 5.893066  | 10.408421 | -1.228501 |
| 6 | 8.025482  | 9.209094  | -2.755624 |
| 1 | 6.403393  | 8.159133  | -3.684004 |
| 1 | 6.528032  | 7.883798  | -1.933332 |
| 6 | 7.304482  | 10.999453 | -1.236202 |
| 1 | 5.786558  | 9.728239  | -0.365394 |
| 1 | 5.179186  | 11.228073 | -1.109611 |
| 7 | 8.296187  | 9.964155  | -1.532858 |
| 1 | 7.517905  | 11.437618 | -0.262972 |
| 1 | 7.364044  | 11.792783 | -1.996457 |
| 1 | 8.145190  | 9.866235  | -3.630427 |
| 1 | 8.748092  | 8.396619  | -2.831900 |
| 6 | 9.542041  | 9.905811  | -0.969053 |
| 8 | 10.420736 | 9.126532  | -1.341500 |
| 8 | 9.670878  | 10.788266 | 0.045628  |
| 6 | 10.902310 | 10.881764 | 0.864056  |
| 6 | 10.547660 | 11.987678 | 1.862146  |
| 6 | 12.086094 | 11.306110 | -0.010673 |
| 6 | 11.152720 | 9.558371  | 1.593691  |
| 1 | 10.264566 | 9.260779  | 2.162814  |
| 1 | 11.980366 | 9.687486  | 2.300508  |
| 1 | 11.412290 | 8.758586  | 0.897300  |
| 1 | 11.847116 | 12.224830 | -0.558496 |
| 1 | 12.355881 | 10.526866 | -0.725952 |
| 1 | 12.952648 | 11.508641 | 0.629134  |
| 1 | 10.324009 | 12.924816 | 1.340906  |
| 1 | 11.391449 | 12.161332 | 2.538303  |
| 1 | 9.676026  | 11.705290 | 2.462530  |
| 1 | -4.961526 | 2.749826  | 0.012598  |
| 1 | -1.384843 | 5.106242  | -3.690626 |
| 6 | -5.198408 | -0.033189 | 1.155267  |
| 6 | -5.196182 | -1.521580 | 0.773499  |
| 1 | -6.201330 | 0.393260  | 1.056702  |
| 1 | -4.907384 | 0.074285  | 2.210746  |
| 6 | -3.795579 | -2.087670 | 0.695193  |
| 1 | -5.674826 | -1.635979 | -0.210359 |
| 1 | -5.793183 | -2.100260 | 1.484201  |
| 6 | -1.429416 | -1.899313 | 0.074117  |
| 6 | -1.214974 | -3.198535 | 0.473978  |
| 6 | -2.285366 | -3.969484 | 0.981991  |
| 6 | -3.566998 | -3.400829 | 1.089500  |
| 8 | -1.978879 | -5.227724 | 1.343256  |
| 6 | -3.000420 | -6.083241 | 1.884573  |
| 1 | -2.502345 | -7.029888 | 2.091071  |
| 1 | -3.802300 | -6.234888 | 1.155424  |
| 1 | -3.402498 | -5.663043 | 2.811612  |
| 1 | -4.395786 | -3.981955 | 1.476879  |
| 1 | -0.590285 | -1.320645 | -0.282040 |
| 1 | -0.227231 | -3.645034 | 0.418636  |
| 6 | 0.937284  | 3.987681  | -5.289686 |
| 6 | 1.885046  | 1.645178  | -5.338028 |
| 6 | 1.770290  | 0.195499  | -3.363094 |
| 6 | 2.816265  | -0.571260 | -3.845596 |
| 6 | 3.402102  | -0.241931 | -5.084661 |
| 6 | 2.925463  | 0.867966  | -5.812078 |
| 8 | 4.420348  | -0.916763 | -5.648810 |

|                                     |           |           |           |                                     |           |           |           |
|-------------------------------------|-----------|-----------|-----------|-------------------------------------|-----------|-----------|-----------|
| 6                                   | 4.973930  | -2.061176 | -4.976495 |                                     |           |           |           |
| 1                                   | 5.766108  | -2.423240 | -5.630988 |                                     |           |           |           |
| 1                                   | 4.213882  | -2.837778 | -4.846824 |                                     |           |           |           |
| 1                                   | 5.393883  | -1.773548 | -4.007627 |                                     |           |           |           |
| 1                                   | 1.355911  | -0.054415 | -2.397738 |                                     |           |           |           |
| 1                                   | 3.178511  | -1.406121 | -3.258057 |                                     |           |           |           |
| 1                                   | 3.395169  | 1.098860  | -6.763821 |                                     |           |           |           |
| 6                                   | 1.365040  | 2.799702  | -6.165699 |                                     |           |           |           |
| 1                                   | 0.494711  | 2.454368  | -6.742990 |                                     |           |           |           |
| 1                                   | 2.123233  | 3.109476  | -6.890848 |                                     |           |           |           |
| 1                                   | 1.829710  | 4.460123  | -4.852812 |                                     |           |           |           |
| 1                                   | 0.433310  | 4.752808  | -5.887718 |                                     |           |           |           |
| Min S <sub>0</sub> (explicit water) |           |           |           | Min S <sub>1</sub> (explicit water) |           |           |           |
| 6                                   | -3.242655 | -0.274296 | 0.029889  | 6                                   | -3.260406 | -0.265439 | -0.014738 |
| 6                                   | -3.078844 | 0.946026  | -0.752862 | 6                                   | -3.084411 | 0.939996  | -0.775747 |
| 6                                   | -3.944604 | 2.062089  | -0.546995 | 6                                   | -3.922272 | 2.076239  | -0.556950 |
| 6                                   | -3.534577 | 3.068979  | -1.396641 | 6                                   | -3.490833 | 3.086374  | -1.380949 |
| 7                                   | -2.168908 | 1.260826  | -1.727440 | 7                                   | -2.158411 | 1.262902  | -1.743473 |
| 6                                   | -2.431767 | 2.570738  | -2.143671 | 6                                   | -2.400158 | 2.573136  | -2.138474 |
| 5                                   | -1.013812 | 0.400469  | -2.318292 | 5                                   | -1.038080 | 0.391832  | -2.341042 |
| 7                                   | -0.392020 | 1.137773  | -3.537710 | 7                                   | -0.398207 | 1.124781  | -3.533567 |
| 9                                   | -1.507348 | -0.854680 | -2.715958 | 9                                   | -1.557360 | -0.847640 | -2.755981 |
| 9                                   | -0.013822 | 0.228210  | -1.323462 | 9                                   | -0.047078 | 0.157652  | -1.348903 |
| 6                                   | -1.718335 | 3.160303  | -3.192703 | 6                                   | -1.674791 | 3.178685  | -3.178036 |
| 6                                   | -0.733454 | 2.447585  | -3.886274 | 6                                   | -0.703448 | 2.435964  | -3.870736 |
| 6                                   | -2.018288 | 4.579951  | -3.596572 | 6                                   | -1.954014 | 4.584385  | -3.581669 |
| 6                                   | 0.538015  | 0.698574  | -4.443798 | 6                                   | 0.523021  | 0.662450  | -4.447464 |
| 6                                   | 0.010560  | 2.819489  | -5.036847 | 6                                   | 0.061449  | 2.808886  | -5.010921 |
| 6                                   | 0.788285  | 1.734631  | -5.391956 | 6                                   | 0.802580  | 1.711836  | -5.376579 |
| 6                                   | 1.239588  | -0.577812 | -4.535575 | 6                                   | 1.192294  | -0.604600 | -4.540320 |
| 8                                   | -1.005827 | 5.433698  | -2.981672 | 8                                   | -0.942990 | 5.446700  | -2.973428 |
| 1                                   | -3.000885 | 4.902917  | -3.255201 | 1                                   | -2.933777 | 4.921246  | -3.246210 |
| 1                                   | -1.968628 | 4.711935  | -4.678599 | 1                                   | -1.896143 | 4.721174  | -4.662832 |
| 6                                   | -1.046729 | 6.755353  | -3.320032 | 6                                   | -0.997587 | 6.758973  | -3.286893 |
| 6                                   | 0.112516  | 7.505878  | -2.811818 | 6                                   | 0.154331  | 7.516190  | -2.778777 |
| 8                                   | -1.960003 | 7.218309  | -3.988576 | 8                                   | -1.916102 | 7.224021  | -3.939728 |
| 6                                   | 0.061792  | 8.955184  | -2.632763 | 6                                   | 0.088724  | 8.955186  | -2.581042 |
| 6                                   | 1.277974  | 6.816004  | -2.532149 | 6                                   | 1.322677  | 6.839297  | -2.515711 |
| 7                                   | 2.417305  | 7.383248  | -2.093710 | 7                                   | 2.453134  | 7.410127  | -2.077753 |
| 1                                   | 1.328895  | 5.745186  | -2.674315 | 1                                   | 1.382713  | 5.770757  | -2.670470 |
| 6                                   | 1.340497  | 9.553562  | -2.205060 | 6                                   | 1.358696  | 9.560992  | -2.148429 |
| 8                                   | -0.952730 | 9.654698  | -2.804742 | 8                                   | -0.926953 | 9.644137  | -2.739871 |
| 6                                   | 2.492326  | 8.779557  | -1.947019 | 6                                   | 2.510836  | 8.799472  | -1.909038 |
| 6                                   | 3.598826  | 6.553164  | -1.884649 | 6                                   | 3.642828  | 6.598130  | -1.889095 |
| 6                                   | 3.457320  | 5.204392  | -1.230874 | 6                                   | 3.518436  | 5.246857  | -1.252469 |
| 6                                   | 4.123579  | 6.335940  | -0.487117 | 6                                   | 4.169257  | 6.373764  | -0.501300 |
| 1                                   | 4.325398  | 6.653633  | -2.687476 | 1                                   | 4.364179  | 6.718264  | -2.692441 |
| 1                                   | 3.564801  | 6.785529  | 0.328959  | 1                                   | 3.605998  | 6.811017  | 0.317313  |
| 1                                   | 5.201884  | 6.328367  | -0.356041 | 1                                   | 5.246576  | 6.376773  | -0.370235 |
| 1                                   | 4.071951  | 4.404231  | -1.632686 | 1                                   | 4.143993  | 4.460320  | -1.661537 |
| 1                                   | 2.475099  | 4.896400  | -0.882813 | 1                                   | 2.539084  | 4.923798  | -0.911609 |
| 6                                   | 1.430191  | 10.949496 | -2.043871 | 6                                   | 1.428214  | 10.950530 | -1.965649 |
| 6                                   | 2.612088  | 11.527739 | -1.661119 | 6                                   | 2.598889  | 11.532328 | -1.576708 |
| 6                                   | 3.799772  | 10.785561 | -1.426986 | 6                                   | 3.788363  | 10.800319 | -1.357830 |
| 6                                   | 3.700665  | 9.395880  | -1.577787 | 6                                   | 3.709743  | 9.421259  | -1.531329 |
| 1                                   | 0.549178  | 11.561007 | -2.205279 | 1                                   | 0.539507  | 11.552331 | -2.116705 |
| 1                                   | 4.577653  | 8.785350  | -1.422238 | 1                                   | 4.592973  | 8.818584  | -1.384847 |
| 9                                   | 2.634358  | 12.877101 | -1.458830 | 9                                   | 2.614055  | 12.871606 | -1.354800 |



|   |           |           |           |   |           |           |           |
|---|-----------|-----------|-----------|---|-----------|-----------|-----------|
| 7 | 4.970367  | 11.426995 | -1.010791 | 7 | 4.948581  | 11.452725 | -0.936951 |
| 6 | 5.510871  | 12.487558 | -1.886434 | 6 | 5.471541  | 12.503646 | -1.821889 |
| 6 | 6.044531  | 10.598445 | -0.455049 | 6 | 6.027473  | 10.628298 | -0.402782 |
| 6 | 6.494214  | 13.369748 | -1.122553 | 6 | 6.459245  | 13.386798 | -1.077507 |
| 1 | 4.697797  | 13.106601 | -2.263230 | 1 | 4.652390  | 13.118967 | -2.189623 |
| 1 | 6.020721  | 12.025506 | -2.748449 | 1 | 5.970922  | 12.040292 | -2.687873 |
| 6 | 7.035284  | 11.463529 | 0.327123  | 6 | 7.022881  | 11.490877 | 0.362487  |
| 1 | 6.581473  | 10.052941 | -1.249965 | 1 | 6.553932  | 10.088393 | -1.206978 |
| 1 | 5.612624  | 9.867406  | 0.233504  | 1 | 5.608622  | 9.893228  | 0.288084  |
| 7 | 7.540425  | 12.553912 | -0.508178 | 7 | 7.509828  | 12.576269 | -0.479041 |
| 1 | 7.867296  | 10.846118 | 0.660436  | 1 | 7.861271  | 10.877973 | 0.684959  |
| 1 | 6.534258  | 11.881594 | 1.213116  | 1 | 6.533773  | 11.909148 | 1.253123  |
| 1 | 5.958241  | 13.932834 | -0.343473 | 1 | 5.933556  | 13.948564 | -0.292587 |
| 1 | 6.960369  | 14.080724 | -1.804605 | 1 | 6.915218  | 14.097139 | -1.765388 |
| 6 | 8.825717  | 13.023912 | -0.469269 | 6 | 8.789652  | 13.040717 | -0.464689 |
| 8 | 9.196157  | 14.038525 | -1.061803 | 8 | 9.151008  | 14.049536 | -1.062957 |
| 8 | 9.622688  | 12.228919 | 0.277093  | 8 | 9.596954  | 12.254223 | 0.263990  |
| 6 | 11.075028 | 12.479035 | 0.431394  | 6 | 11.037741 | 12.510594 | 0.390764  |
| 6 | 11.512156 | 11.318918 | 1.330393  | 6 | 11.499425 | 11.362368 | 1.280738  |
| 6 | 11.307165 | 13.820631 | 1.133313  | 6 | 11.274359 | 13.849915 | 1.080757  |
| 6 | 11.771982 | 12.397161 | -0.930052 | 6 | 11.707846 | 12.429774 | -0.976677 |
| 1 | 11.536615 | 11.447760 | -1.424534 | 1 | 11.467157 | 11.479185 | -1.463489 |
| 1 | 12.857086 | 12.442513 | -0.782769 | 1 | 12.793743 | 12.479909 | -0.849029 |
| 1 | 11.475449 | 13.220389 | -1.582886 | 1 | 11.395003 | 13.249591 | -1.624130 |
| 1 | 10.746102 | 13.862472 | 2.073885  | 1 | 10.729427 | 13.890990 | 2.029353  |
| 1 | 11.007045 | 14.660423 | 0.503741  | 1 | 10.958502 | 14.684180 | 0.453657  |
| 1 | 12.372438 | 13.924361 | 1.369311  | 1 | 12.341587 | 13.959433 | 1.297712  |
| 1 | 10.983369 | 11.349241 | 2.289248  | 1 | 10.988428 | 11.392838 | 2.247737  |
| 1 | 12.587431 | 11.386819 | 1.526541  | 1 | 12.576414 | 11.438184 | 1.455842  |
| 1 | 11.308699 | 10.355949 | 0.849518  | 1 | 11.292761 | 10.398148 | 0.806700  |
| 1 | -3.977585 | 4.051341  | -1.491773 | 1 | -3.906634 | 4.081241  | -1.459006 |
| 1 | -0.041053 | 3.773675  | -5.544641 | 1 | 0.042845  | 3.774885  | -5.496601 |
| 6 | -5.059548 | 2.004304  | 0.452385  | 6 | -5.016093 | 2.043262  | 0.456497  |
| 6 | -5.604931 | 0.568657  | 0.503741  | 6 | -5.581032 | 0.624351  | 0.535616  |
| 1 | -5.855537 | 2.709968  | 0.192330  | 1 | -5.802850 | 2.760482  | 0.205978  |
| 1 | -4.690596 | 2.291180  | 1.448921  | 1 | -4.619482 | 2.335418  | 1.439302  |
| 6 | -4.494521 | -0.447930 | 0.685085  | 6 | -4.493460 | -0.410520 | 0.687151  |
| 1 | -6.132023 | 0.356647  | -0.439103 | 1 | -6.135137 | 0.414240  | -0.390325 |
| 1 | -6.341091 | 0.464591  | 1.307234  | 1 | -6.295683 | 0.537872  | 1.358367  |
| 6 | -2.247506 | -1.258963 | 0.223782  | 6 | -2.296676 | -1.293508 | 0.125269  |
| 6 | -2.478872 | -2.375629 | 1.010466  | 6 | -2.536479 | -2.400992 | 0.906022  |
| 6 | -3.724149 | -2.549908 | 1.638054  | 6 | -3.756508 | -2.534677 | 1.585453  |
| 6 | -4.722095 | -1.579427 | 1.473099  | 6 | -4.724696 | -1.532381 | 1.470780  |
| 8 | -3.862356 | -3.675599 | 2.388613  | 8 | -3.903802 | -3.652368 | 2.326778  |
| 6 | -5.105269 | -3.915182 | 3.058578  | 6 | -5.116178 | -3.850537 | 3.048994  |
| 1 | -4.976560 | -4.862145 | 3.583425  | 1 | -5.000673 | -4.803550 | 3.563093  |
| 1 | -5.927758 | -4.000629 | 2.339689  | 1 | -5.971740 | -3.900702 | 2.368528  |
| 1 | -5.321288 | -3.119866 | 3.780626  | 1 | -5.268008 | -3.052693 | 3.782357  |
| 1 | -5.686759 | -1.690547 | 1.955853  | 1 | -5.673077 | -1.619236 | 1.987637  |
| 1 | -1.273667 | -1.137518 | -0.228516 | 1 | -1.339921 | -1.201786 | -0.366138 |
| 1 | -1.702845 | -3.120735 | 1.159283  | 1 | -1.786868 | -3.177939 | 1.016456  |
| 6 | 1.752217  | 1.536613  | -6.522475 | 6 | 1.788607  | 1.523128  | -6.480101 |
| 6 | 1.854040  | -0.879609 | -5.790690 | 6 | 1.861158  | -0.893279 | -5.773441 |
| 6 | 1.399980  | -1.495816 | -3.481548 | 6 | 1.278770  | -1.559385 | -3.506203 |
| 6 | 2.116286  | -2.681109 | -3.638921 | 6 | 1.978637  | -2.743883 | -3.659609 |
| 6 | 2.700331  | -2.974358 | -4.879109 | 6 | 2.623093  | -3.011642 | -4.872268 |
| 6 | 2.564643  | -2.063899 | -5.940807 | 6 | 2.556077  | -2.076168 | -5.914876 |
| 8 | 3.419671  | -4.097424 | -5.148811 | 8 | 3.331968  | -4.130656 | -5.128953 |
| 6 | 3.602549  | -5.065484 | -4.109463 | 6 | 3.441911  | -5.125740 | -4.114623 |

|                                     |           |           |           |                                    |           |           |           |
|-------------------------------------|-----------|-----------|-----------|------------------------------------|-----------|-----------|-----------|
| 1                                   | 4.194874  | -5.865099 | -4.555105 | 1                                  | 4.044153  | -5.923062 | -4.547566 |
| 1                                   | 2.639537  | -5.464084 | -3.771341 | 1                                  | 2.456142  | -5.514854 | -3.842244 |
| 1                                   | 4.145708  | -4.632656 | -3.261869 | 1                                  | 3.943588  | -4.725124 | -3.228428 |
| 1                                   | 0.979413  | -1.278893 | -2.509784 | 1                                  | 0.812286  | -1.359759 | -2.553201 |
| 1                                   | 2.218397  | -3.352715 | -2.794484 | 1                                  | 2.025707  | -3.441637 | -2.832759 |
| 1                                   | 3.031117  | -2.304899 | -6.892514 | 1                                  | 3.061926  | -2.307404 | -6.847695 |
| 6                                   | 1.701066  | 0.065903  | -6.965873 | 6                                  | 1.756792  | 0.063440  | -6.935467 |
| 1                                   | 0.731091  | -0.122081 | -7.451022 | 1                                  | 0.806128  | -0.121604 | -7.455094 |
| 1                                   | 2.473921  | -0.139754 | -7.713371 | 1                                  | 2.555297  | -0.135702 | -7.655035 |
| 1                                   | 2.774203  | 1.785637  | -6.198257 | 1                                  | 2.797296  | 1.774063  | -6.122209 |
| 1                                   | 1.513753  | 2.200194  | -7.360403 | 1                                  | 1.572341  | 2.194923  | -7.315627 |
| 8                                   | -0.017683 | 4.713749  | -0.182983 | 8                                  | 0.201950  | 4.586197  | -0.385996 |
| 1                                   | -0.372611 | 3.865953  | 0.128717  | 1                                  | -0.123463 | 3.735090  | -0.056932 |
| 1                                   | -0.455041 | 4.864609  | -1.040421 | 1                                  | -0.305162 | 4.757408  | -1.199217 |
| 8                                   | -4.583312 | 6.915300  | -5.103545 | 8                                  | -4.423101 | 6.601558  | -5.084138 |
| 1                                   | -3.689806 | 7.005909  | -4.716386 | 1                                  | -3.558597 | 6.827222  | -4.687726 |
| 1                                   | -4.893917 | 7.824200  | -5.237534 | 1                                  | -4.834825 | 7.448102  | -5.309767 |
| Min T <sub>1</sub> (explicit water) |           |           |           | TS T <sub>1</sub> (explicit water) |           |           |           |
| 6                                   | -3.320454 | -0.305099 | 0.001474  | 6                                  | -3.105537 | -0.274838 | 0.031059  |
| 6                                   | -3.120015 | 0.902570  | -0.758998 | 6                                  | -3.123539 | 0.881277  | -0.825908 |
| 6                                   | -3.939083 | 2.058714  | -0.542592 | 6                                  | -4.127009 | 1.899529  | -0.676082 |
| 6                                   | -3.487663 | 3.060938  | -1.370415 | 6                                  | -3.862910 | 2.886084  | -1.598226 |
| 7                                   | -2.176205 | 1.216049  | -1.739181 | 7                                  | -2.271316 | 1.262615  | -1.854264 |
| 6                                   | -2.398481 | 2.525741  | -2.131483 | 6                                  | -2.717121 | 2.474585  | -2.337968 |
| 5                                   | -1.067262 | 0.323221  | -2.344207 | 5                                  | -1.031852 | 0.515067  | -2.418447 |
| 7                                   | -0.408186 | 1.058432  | -3.534613 | 7                                  | -0.523184 | 1.246864  | -3.690389 |
| 9                                   | -1.612536 | -0.906226 | -2.774289 | 9                                  | -1.376755 | -0.809783 | -2.734452 |
| 9                                   | -0.078830 | 0.063449  | -1.348010 | 9                                  | -0.004159 | 0.522866  | -1.440552 |
| 6                                   | -1.660554 | 3.132716  | -3.172475 | 6                                  | -2.101083 | 3.121173  | -3.458995 |
| 6                                   | -0.696452 | 2.369270  | -3.869109 | 6                                  | -1.015809 | 2.460162  | -4.122063 |
| 6                                   | -1.929785 | 4.539757  | -3.578635 | 6                                  | -2.539114 | 4.380284  | -3.888016 |
| 6                                   | 0.521011  | 0.581354  | -4.461441 | 6                                  | 0.458571  | 0.848859  | -4.589071 |
| 6                                   | 0.077862  | 2.741142  | -5.014982 | 6                                  | -0.329051 | 2.855328  | -5.305833 |
| 6                                   | 0.810831  | 1.637634  | -5.387407 | 6                                  | 0.569239  | 1.858350  | -5.606776 |
| 6                                   | 1.177335  | -0.696761 | -4.560747 | 6                                  | 1.304384  | -0.315482 | -4.604245 |
| 8                                   | -0.921109 | 5.423839  | -2.949433 | 8                                  | -1.447235 | 5.737926  | -2.864809 |
| 1                                   | -2.913177 | 4.882942  | -3.258372 | 1                                  | -3.472675 | 4.783773  | -3.522499 |
| 1                                   | -1.849576 | 4.686222  | -4.657711 | 1                                  | -2.218006 | 4.771916  | -4.843157 |
| 6                                   | -0.983337 | 6.742443  | -3.266582 | 6                                  | -1.205500 | 6.864518  | -3.463220 |
| 6                                   | 0.172166  | 7.507775  | -2.761654 | 6                                  | -0.021494 | 7.621059  | -2.931287 |
| 8                                   | -1.907298 | 7.211255  | -3.920292 | 8                                  | -1.856982 | 7.301635  | -4.433958 |
| 6                                   | 0.093400  | 8.947983  | -2.532822 | 6                                  | 0.034609  | 9.075445  | -2.889215 |
| 6                                   | 1.359981  | 6.838084  | -2.537156 | 6                                  | 1.048506  | 6.883821  | -2.477958 |
| 7                                   | 2.499155  | 7.417548  | -2.110629 | 7                                  | 2.207459  | 7.403332  | -2.005258 |
| 1                                   | 1.431173  | 5.774092  | -2.716983 | 1                                  | 1.004306  | 5.802506  | -2.491362 |
| 6                                   | 1.368657  | 9.562676  | -2.117575 | 6                                  | 1.324364  | 9.619486  | -2.420741 |
| 8                                   | -0.941257 | 9.629240  | -2.654386 | 8                                  | -0.908328 | 9.833627  | -3.196449 |
| 6                                   | 2.545075  | 8.808717  | -1.916959 | 6                                  | 2.389523  | 8.792422  | -1.999442 |
| 6                                   | 3.706224  | 6.610884  | -1.968853 | 6                                  | 3.293876  | 6.511092  | -1.625513 |
| 6                                   | 3.618365  | 5.235263  | -1.363510 | 6                                  | 2.995637  | 5.260496  | -0.841934 |
| 6                                   | 4.280168  | 6.354538  | -0.597422 | 6                                  | 3.712886  | 6.410518  | -0.179173 |
| 1                                   | 4.405140  | 6.759228  | -2.788692 | 1                                  | 4.075989  | 6.454217  | -2.379636 |
| 1                                   | 3.736966  | 6.758598  | 0.252307  | 1                                  | 3.148313  | 6.994019  | 0.542599  |
| 1                                   | 5.362001  | 6.369332  | -0.499999 | 1                                  | 4.775825  | 6.326795  | 0.028660  |
| 1                                   | 4.239678  | 4.467006  | -1.814412 | 1                                  | 3.557822  | 4.370730  | -1.109339 |
| 1                                   | 2.655138  | 4.889037  | -0.998718 | 1                                  | 1.971198  | 5.072402  | -0.534550 |
| 6                                   | 1.429461  | 10.954164 | -1.910010 | 6                                  | 1.516169  | 11.015032 | -2.386256 |
| 6                                   | 2.606884  | 11.547898 | -1.537590 | 6                                  | 2.710846  | 11.541396 | -1.971372 |

|   |           |           |           |   |           |           |           |
|---|-----------|-----------|-----------|---|-----------|-----------|-----------|
| 6 | 3.817323  | 10.827402 | -1.359257 | 6 | 3.816890  | 10.741662 | -1.579423 |
| 6 | 3.747829  | 9.442105  | -1.556950 | 6 | 3.617782  | 9.356205  | -1.603262 |
| 1 | 0.530020  | 11.548705 | -2.027288 | 1 | 0.700001  | 11.669657 | -2.672203 |
| 1 | 4.642857  | 8.848384  | -1.444935 | 1 | 4.430545  | 8.702412  | -1.323482 |
| 9 | 2.602895  | 12.889939 | -1.289147 | 9 | 2.827584  | 12.900857 | -1.896758 |
| 7 | 4.982288  | 11.483474 | -0.948522 | 7 | 5.005969  | 11.337060 | -1.139161 |
| 6 | 5.477727  | 12.582715 | -1.802574 | 6 | 5.686485  | 12.255337 | -2.075440 |
| 6 | 6.087857  | 10.663980 | -0.443569 | 6 | 5.971435  | 10.488613 | -0.434515 |
| 6 | 6.457481  | 13.464466 | -1.033679 | 6 | 6.692893  | 13.132140 | -1.335125 |
| 1 | 4.641919  | 13.193463 | -2.141458 | 1 | 4.952778  | 12.894119 | -2.565463 |
| 1 | 5.978065  | 12.159826 | -2.689948 | 1 | 6.207334  | 11.669660 | -2.851781 |
| 6 | 7.075011  | 11.527985 | 0.344263  | 6 | 6.984338  | 11.348242 | 0.325242  |
| 1 | 6.619932  | 10.157072 | -1.266904 | 1 | 6.507162  | 9.824024  | -1.134353 |
| 1 | 5.688981  | 9.901110  | 0.230284  | 1 | 5.439014  | 9.867287  | 0.290524  |
| 7 | 7.535813  | 12.655754 | -0.466926 | 7 | 7.628568  | 12.304207 | -0.576120 |
| 1 | 7.928606  | 10.920889 | 0.639876  | 1 | 7.739616  | 10.705064 | 0.772932  |
| 1 | 6.584111  | 11.905936 | 1.253634  | 1 | 6.469107  | 11.893683 | 1.130064  |
| 1 | 5.926149  | 13.991173 | -0.226425 | 1 | 6.159999  | 13.809628 | -0.650828 |
| 1 | 6.891784  | 14.206423 | -1.703639 | 1 | 7.256568  | 13.733538 | -2.048278 |
| 6 | 8.808503  | 13.159692 | -0.433437 | 6 | 8.949186  | 12.657643 | -0.515529 |
| 8 | 9.141992  | 14.201015 | -1.000992 | 8 | 9.440928  | 13.566422 | -1.186623 |
| 8 | 9.638364  | 12.365397 | 0.276872  | 8 | 9.633254  | 11.878262 | 0.350254  |
| 6 | 11.085702 | 12.650263 | 0.416607  | 6 | 11.095274 | 12.008906 | 0.552013  |
| 6 | 11.567127 | 11.478035 | 1.276393  | 6 | 11.380777 | 10.915079 | 1.585128  |
| 6 | 11.293611 | 13.977674 | 1.152270  | 6 | 11.427720 | 13.389974 | 1.125201  |
| 6 | 11.763175 | 12.624706 | -0.956846 | 6 | 11.836818 | 11.719905 | -0.756780 |
| 1 | 11.545077 | 11.683432 | -1.474246 | 1 | 11.529279 | 10.750504 | -1.165383 |
| 1 | 12.848902 | 12.694921 | -0.824596 | 1 | 12.913906 | 11.677613 | -0.558631 |
| 1 | 11.434941 | 13.457555 | -1.581771 | 1 | 11.651244 | 12.494710 | -1.503263 |
| 1 | 10.745943 | 13.978851 | 2.101621  | 1 | 10.837102 | 13.581984 | 2.028274  |
| 1 | 10.962510 | 14.826356 | 0.550811  | 1 | 11.234664 | 14.182679 | 0.399958  |
| 1 | 12.359330 | 14.102506 | 1.375725  | 1 | 12.488092 | 13.419713 | 1.400905  |
| 1 | 11.052017 | 11.467515 | 2.243091  | 1 | 10.816373 | 11.093938 | 2.506763  |
| 1 | 12.642960 | 11.569841 | 1.459141  | 1 | 12.448138 | 10.905748 | 1.830017  |
| 1 | 11.382351 | 10.523530 | 0.771704  | 1 | 11.107212 | 9.929160  | 1.193863  |
| 1 | -3.883005 | 4.064269  | -1.449286 | 1 | -4.427463 | 3.794856  | -1.754750 |
| 1 | 0.069603  | 3.710505  | -5.494488 | 1 | -0.500695 | 3.764057  | -5.865828 |
| 6 | -5.040016 | 2.046350  | 0.469839  | 6 | -5.195401 | 1.786169  | 0.362270  |
| 6 | -5.635080 | 0.631975  | 0.548775  | 6 | -5.539718 | 0.303211  | 0.569957  |
| 1 | -5.813069 | 2.779653  | 0.217674  | 1 | -6.084092 | 2.355813  | 0.072842  |
| 1 | -4.640378 | 2.330686  | 1.455284  | 1 | -4.835520 | 2.214554  | 1.309812  |
| 6 | -4.564106 | -0.427584 | 0.702564  | 6 | -4.302361 | -0.544626 | 0.773410  |
| 1 | -6.194933 | 0.434594  | -0.378257 | 1 | -6.073999 | -0.062815 | -0.319666 |
| 1 | -6.353010 | 0.561552  | 1.371950  | 1 | -6.219514 | 0.181788  | 1.418622  |
| 6 | -2.374703 | -1.355021 | 0.145344  | 6 | -1.990793 | -1.133469 | 0.230278  |
| 6 | -2.638562 | -2.462850 | 0.928539  | 6 | -2.050383 | -2.198741 | 1.104696  |
| 6 | -3.866882 | -2.574955 | 1.607899  | 6 | -3.235167 | -2.459810 | 1.824040  |
| 6 | -4.818485 | -1.549476 | 1.489313  | 6 | -4.351247 | -1.624638 | 1.650754  |
| 8 | -4.035184 | -3.697113 | 2.351832  | 8 | -3.197509 | -3.523167 | 2.656471  |
| 6 | -5.258971 | -3.878441 | 3.075819  | 6 | -4.357459 | -3.849310 | 3.436985  |
| 1 | -5.156023 | -4.835954 | 3.586625  | 1 | -4.077863 | -4.728361 | 4.017283  |
| 1 | -6.115024 | -3.913702 | 2.393224  | 1 | -5.207185 | -4.087309 | 2.788795  |
| 1 | -5.399074 | -3.079752 | 3.812266  | 1 | -4.615265 | -3.025869 | 4.111035  |
| 1 | -5.770469 | -1.618172 | 2.003912  | 1 | -5.269802 | -1.812300 | 2.195116  |
| 1 | -1.414358 | -1.282575 | -0.343332 | 1 | -1.062650 | -0.938741 | -0.285945 |
| 1 | -1.901655 | -3.252923 | 1.039344  | 1 | -1.188352 | -2.840013 | 1.261036  |
| 6 | 1.794266  | 1.443694  | -6.497883 | 6 | 1.555346  | 1.728798  | -6.722416 |
| 6 | 1.843340  | -0.987312 | -5.802301 | 6 | 1.988662  | -0.599894 | -5.837728 |
| 6 | 1.258566  | -1.661026 | -3.527946 | 6 | 1.550300  | -1.164739 | -3.498294 |

|                                          |           |           |           |   |           |           |           |
|------------------------------------------|-----------|-----------|-----------|---|-----------|-----------|-----------|
| 6                                        | 1.950157  | -2.855851 | -3.689114 | 6 | 2.415342  | -2.246036 | -3.581492 |
| 6                                        | 2.592396  | -3.126238 | -4.908577 | 6 | 3.071561  | -2.516386 | -4.795971 |
| 6                                        | 2.530410  | -2.180814 | -5.950558 | 6 | 2.848025  | -1.682643 | -5.909238 |
| 8                                        | 3.295149  | -4.255114 | -5.176700 | 8 | 3.933371  | -3.538858 | -4.990875 |
| 6                                        | 3.401611  | -5.265044 | -4.164700 | 6 | 4.214305  | -4.437045 | -3.906645 |
| 1                                        | 3.996870  | -6.062259 | -4.610140 | 1 | 4.922646  | -5.161851 | -4.307404 |
| 1                                        | 2.412917  | -5.649501 | -3.891898 | 1 | 3.302997  | -4.949400 | -3.581308 |
| 1                                        | 3.910845  | -4.875360 | -3.276588 | 1 | 4.667354  | -3.901300 | -3.066069 |
| 1                                        | 0.796279  | -1.462325 | -2.572186 | 1 | 1.080592  | -0.958739 | -2.548014 |
| 1                                        | 1.992564  | -3.557283 | -2.864048 | 1 | 2.582220  | -2.859458 | -2.704066 |
| 1                                        | 3.031485  | -2.411586 | -6.886968 | 1 | 3.364843  | -1.912204 | -6.836923 |
| 6                                        | 1.746746  | -0.020027 | -6.963212 | 6 | 1.731075  | 0.242097  | -7.068948 |
| 1                                        | 0.793120  | -0.190636 | -7.485583 | 1 | 0.811814  | -0.117102 | -7.555299 |
| 1                                        | 2.543700  | -0.221430 | -7.685812 | 1 | 2.543514  | 0.107862  | -7.789450 |
| 1                                        | 2.807850  | 1.681596  | -6.140547 | 1 | 2.523028  | 2.149124  | -6.409479 |
| 1                                        | 1.583929  | 2.123286  | -7.330249 | 1 | 1.230262  | 2.297729  | -7.599223 |
| 8                                        | 0.187638  | 4.561603  | -0.285586 | 8 | -1.283965 | 5.224777  | -0.095313 |
| 1                                        | -0.093024 | 3.668187  | -0.031493 | 1 | -2.026843 | 4.622994  | 0.069965  |
| 1                                        | -0.267173 | 4.734644  | -1.130944 | 1 | -1.323695 | 5.412629  | -1.060418 |
| 8                                        | -4.485088 | 6.825510  | -5.085980 | 8 | -4.566623 | 6.996415  | -4.933708 |
| 1                                        | -3.602249 | 6.937177  | -4.678349 | 1 | -3.600599 | 7.085533  | -4.747449 |
| 1                                        | -4.808192 | 7.726865  | -5.239716 | 1 | -4.892697 | 7.905269  | -5.021711 |
| Products T <sub>1</sub> (explicit water) |           |           |           |   |           |           |           |
| 6                                        | -3.976302 | -4.992583 | 1.349040  |   |           |           |           |
| 6                                        | -3.907512 | -4.092217 | 0.235403  |   |           |           |           |
| 6                                        | -4.570659 | -2.809539 | 0.271549  |   |           |           |           |
| 6                                        | -4.286334 | -2.158414 | -0.903964 |   |           |           |           |
| 7                                        | -3.249659 | -4.204409 | -0.975949 |   |           |           |           |
| 6                                        | -3.480142 | -3.039057 | -1.675989 |   |           |           |           |
| 5                                        | -2.405436 | -5.392174 | -1.523538 |   |           |           |           |
| 7                                        | -2.071317 | -5.133478 | -3.024238 |   |           |           |           |
| 9                                        | -3.129865 | -6.584671 | -1.404116 |   |           |           |           |
| 9                                        | -1.199298 | -5.474857 | -0.791738 |   |           |           |           |
| 6                                        | -2.995407 | -2.844681 | -3.021746 |   |           |           |           |
| 6                                        | -2.342180 | -3.951525 | -3.679358 |   |           |           |           |
| 6                                        | -3.187048 | -1.646062 | -3.669907 |   |           |           |           |
| 6                                        | -1.514093 | -5.999782 | -3.946805 |   |           |           |           |
| 6                                        | -1.948297 | -4.056236 | -5.041137 |   |           |           |           |
| 6                                        | -1.450760 | -5.323358 | -5.221424 |   |           |           |           |
| 6                                        | -1.016258 | -7.335425 | -3.795984 |   |           |           |           |
| 8                                        | -3.011816 | 1.841320  | 0.797526  |   |           |           |           |
| 1                                        | -3.701367 | -0.816206 | -3.195933 |   |           |           |           |
| 1                                        | -2.827952 | -1.493432 | -4.680983 |   |           |           |           |
| 6                                        | -2.522410 | 2.550587  | -0.135208 |   |           |           |           |
| 6                                        | -1.344795 | 3.441861  | 0.209997  |   |           |           |           |
| 8                                        | -2.916053 | 2.539437  | -1.337325 |   |           |           |           |
| 6                                        | -1.211080 | 4.808841  | -0.263958 |   |           |           |           |
| 6                                        | -0.368224 | 2.906572  | 1.012141  |   |           |           |           |
| 7                                        | 0.773895  | 3.543090  | 1.389437  |   |           |           |           |
| 1                                        | -0.471732 | 1.899147  | 1.395133  |   |           |           |           |
| 6                                        | 0.061167  | 5.461855  | 0.100371  |   |           |           |           |
| 8                                        | -2.086355 | 5.424782  | -0.912287 |   |           |           |           |
| 6                                        | 1.035916  | 4.826676  | 0.903769  |   |           |           |           |
| 6                                        | 1.758601  | 2.835278  | 2.192892  |   |           |           |           |
| 6                                        | 1.301984  | 1.984588  | 3.348728  |   |           |           |           |
| 6                                        | 2.030765  | 3.279911  | 3.609452  |   |           |           |           |
| 1                                        | 2.604375  | 2.475792  | 1.610143  |   |           |           |           |
| 1                                        | 1.442133  | 4.109842  | 3.990289  |   |           |           |           |

|   |           |           |           |
|---|-----------|-----------|-----------|
| 1 | 3.060816  | 3.251991  | 3.953667  |
| 1 | 1.825620  | 1.045405  | 3.501329  |
| 1 | 0.241318  | 1.956351  | 3.581574  |
| 6 | 0.331840  | 6.765985  | -0.361886 |
| 6 | 1.515310  | 7.381287  | -0.051143 |
| 6 | 2.533369  | 6.760478  | 0.719931  |
| 6 | 2.256689  | 5.472125  | 1.188888  |
| 1 | -0.416037 | 7.285460  | -0.951249 |
| 1 | 3.001486  | 4.952262  | 1.773490  |
| 9 | 1.708155  | 8.667462  | -0.474054 |
| 7 | 3.714156  | 7.452974  | 1.026320  |
| 6 | 4.531303  | 7.915527  | -0.113980 |
| 6 | 4.559280  | 6.912696  | 2.094549  |
| 6 | 5.528408  | 8.980671  | 0.333533  |
| 1 | 3.885653  | 8.336336  | -0.884059 |
| 1 | 5.074852  | 7.059720  | -0.549490 |
| 6 | 5.558449  | 7.969053  | 2.571105  |
| 1 | 5.108144  | 6.015767  | 1.758460  |
| 1 | 3.928336  | 6.631733  | 2.942111  |
| 7 | 6.338805  | 8.486395  | 1.445805  |
| 1 | 6.229482  | 7.526228  | 3.304771  |
| 1 | 5.014213  | 8.796374  | 3.050901  |
| 1 | 4.986618  | 9.886767  | 0.644716  |
| 1 | 6.189909  | 9.239972  | -0.492992 |
| 6 | 7.663336  | 8.824115  | 1.515802  |
| 8 | 8.266412  | 9.401564  | 0.609747  |
| 8 | 8.216203  | 8.429484  | 2.683536  |
| 6 | 9.654485  | 8.617960  | 2.984847  |
| 6 | 9.778425  | 8.001428  | 4.381174  |
| 6 | 9.993872  | 10.111169 | 3.023931  |
| 6 | 10.510975 | 7.845003  | 1.977188  |
| 1 | 10.200848 | 6.794535  | 1.936858  |
| 1 | 11.559105 | 7.876797  | 2.296023  |
| 1 | 10.439292 | 8.274857  | 0.976155  |
| 1 | 9.323108  | 10.638221 | 3.712075  |
| 1 | 9.916119  | 10.566365 | 2.034771  |
| 1 | 11.020132 | 10.238019 | 3.387156  |
| 1 | 9.132944  | 8.523895  | 5.095558  |
| 1 | 10.813557 | 8.078681  | 4.730238  |
| 1 | 9.496965  | 6.942892  | 4.365519  |
| 1 | -4.608334 | -1.169208 | -1.209490 |
| 1 | -2.045388 | -3.284303 | -5.791572 |
| 6 | -5.364567 | -2.385560 | 1.462953  |
| 6 | -6.002721 | -3.623090 | 2.112618  |
| 1 | -6.128891 | -1.654590 | 1.182344  |
| 1 | -4.701384 | -1.892249 | 2.189006  |
| 6 | -5.000429 | -4.736254 | 2.323514  |
| 1 | -6.804270 | -3.994163 | 1.456829  |
| 1 | -6.471433 | -3.358629 | 3.064886  |
| 6 | -3.087688 | -6.080240 | 1.580096  |
| 6 | -3.203635 | -6.874521 | 2.698149  |
| 6 | -4.223395 | -6.622456 | 3.643774  |
| 6 | -5.110417 | -5.549721 | 3.445510  |
| 8 | -4.259012 | -7.454042 | 4.700210  |
| 6 | -5.255317 | -7.268425 | 5.720535  |
| 1 | -5.073340 | -8.059775 | 6.446872  |
| 1 | -6.260813 | -7.371365 | 5.300920  |
| 1 | -5.140029 | -6.290407 | 6.197968  |
| 1 | -5.895937 | -5.345583 | 4.163883  |

|   |           |            |           |
|---|-----------|------------|-----------|
| 1 | -2.282365 | -6.274295  | 0.887576  |
| 1 | -2.512806 | -7.692303  | 2.877267  |
| 6 | -0.889291 | -5.997780  | -6.429518 |
| 6 | -0.796706 | -8.085266  | -5.007188 |
| 6 | -0.677206 | -7.945257  | -2.560588 |
| 6 | -0.155297 | -9.224732  | -2.497326 |
| 6 | 0.043899  | -9.951297  | -3.689236 |
| 6 | -0.279763 | -9.364655  | -4.930339 |
| 8 | 0.542055  | -11.198887 | -3.745617 |
| 6 | 0.904085  | -11.876624 | -2.529565 |
| 1 | 1.267437  | -12.854558 | -2.843464 |
| 1 | 0.031732  | -11.993998 | -1.879457 |
| 1 | 1.698534  | -11.333838 | -2.008093 |
| 1 | -0.792201 | -7.393198  | -1.639605 |
| 1 | 0.105516  | -9.645196  | -1.533654 |
| 1 | -0.116487 | -9.947364  | -5.832297 |
| 6 | -1.181626 | -7.504410  | -6.349756 |
| 1 | -2.258569 | -7.664523  | -6.506050 |
| 1 | -0.662336 | -8.039453  | -7.149942 |
| 1 | 0.198430  | -5.836881  | -6.466251 |
| 1 | -1.305914 | -5.566827  | -7.345032 |
| 8 | -2.645267 | 2.065254   | 3.497279  |
| 1 | -3.525763 | 1.902234   | 3.868860  |
| 1 | -2.764738 | 2.016337   | 2.511419  |
| 8 | -4.891145 | 0.887528   | -2.186587 |
| 1 | -4.188821 | 1.488290   | -1.805839 |
| 1 | -5.723735 | 1.182686   | -1.786804 |

## 10. References

1. Sitkowska, K.; Feringa, B. L.; Szymański, W., Green-Light-Sensitive BODIPY Photoprotecting Groups for Amines. *The Journal of Organic Chemistry* **2018**, *83* (4), 1819-1827.
2. Peterson, J. A.; Wijesooriya, C.; Gehrmann, E. J.; Mahoney, K. M.; Goswami, P. P.; Albright, T. R.; Syed, A.; Dutton, A. S.; Smith, E. A.; Winter, A. H., Family of BODIPY Photocages Cleaved by Single Photons of Visible/Near-Infrared Light. *J. Am. Chem. Soc.* **2018**, *140* (23), 7343-7346.
3. Megerle, U.; Lechner, R.; König, B.; Riedle, E., Laboratory apparatus for the accurate, facile and rapid determination of visible light photoreaction quantum yields. *Photochem. Photobiol. Sci.* **2010**, *9* (10), 1400-1406.
4. European Committee on Antimicrobial Susceptibility Testing, Determination of minimum inhibitory concentrations (MICs) of antibacterial agents by broth microdilution, EUCAST Discussion Document E.Def 5.1. *Clin. Microbiol. Infect.* **2003**, *9* (7), 1-10.
5. Becke, A. D., Density-functional thermochemistry. III. The role of exact exchange. *The Journal of Chemical Physics* **1993**, *98* (7), 5648-5652.
6. Lee, C.; Yang, W.; Parr, R. G., Development of the Colle-Salvetti correlation-energy formula into a functional of the electron density. *Phys. Rev. B* **1988**, *37* (2), 785-789.
7. Yanai, T.; Tew, D. P.; Handy, N. C., A new hybrid exchange–correlation functional using the Coulomb-attenuating method (CAM-B3LYP). *Chem. Phys. Lett.* **2004**, *393* (1), 51-57.
8. Tomasi, J.; Mennucci, B.; Cammi, R., Quantum Mechanical Continuum Solvation Models. *Chem. Rev.* **2005**, *105* (8), 2999-3094.

9. Frisch, M. J.; Trucks, G. W.; Schlegel, H. B.; Scuseria, G. E.; Robb, M. A.; Cheeseman, J. R.; Scalmani, G.; Barone, V.; Petersson, G. A.; Nakatsuji, H.; Li, X.; Caricato, M.; Marenich, A. V.; Bloino, J.; Janesko, B. G.; Gomperts, R.; Mennucci, B.; Hratchian, H. P.; Ortiz, J. V.; Izmaylov, A. F.; Sonnenberg, J. L.; Williams; Ding, F.; Lipparini, F.; Egidi, F.; Goings, J.; Peng, B.; Petrone, A.; Henderson, T.; Ranasinghe, D.; Zakrzewski, V. G.; Gao, J.; Rega, N.; Zheng, G.; Liang, W.; Hada, M.; Ehara, M.; Toyota, K.; Fukuda, R.; Hasegawa, J.; Ishida, M.; Nakajima, T.; Honda, Y.; Kitao, O.; Nakai, H.; Vreven, T.; Throssell, K.; Montgomery Jr., J. A.; Peralta, J. E.; Ogliaro, F.; Bearpark, M. J.; Heyd, J. J.; Brothers, E. N.; Kudin, K. N.; Staroverov, V. N.; Keith, T. A.; Kobayashi, R.; Normand, J.; Raghavachari, K.; Rendell, A. P.; Burant, J. C.; Iyengar, S. S.; Tomasi, J.; Cossi, M.; Millam, J. M.; Klene, M.; Adamo, C.; Cammi, R.; Ochterski, J. W.; Martin, R. L.; Morokuma, K.; Farkas, O.; Foresman, J. B.; Fox, D. J. Gaussian 16 Rev. C.01, Wallingford, CT, 2016.
10. Weigend, F.; Ahlrichs, R. Balanced basis sets of split valence, triple zeta valence and quadruple zeta valence quality for H to Rn: Design and assessment of accuracy. *Phys. Chem. Chem. Phys.* **2005**, *7*, 3297-3305.
11. Rappoport, D.; Furche, F. Property-optimized Gaussian basis sets for molecular response calculations. *J. Chem. Phys.*, **2010**, *133*, 134105.
12. Neese, F.; Wennmohs, F.; Becker, U.; Riplinger, C. The ORCA quantum chemistry program package. *J. Chem. Phys.*, **2020**, *152*, 224108.
